# Supplementary material for: Dnajb8, a target gene of SOX30, is dispensable for male fertility in mice
Source: PeerJ. 2020 Dec 21;8:e10582. doi: 10.7717/peerj.10582 (PMC7759119; doi:10.7717/peerj.10582)
Supplement: Supplemental Information 1 [file peerj-08-10582-s001.xlsx]

## Sheet: Fig 1A
symbol	logFC	logCPM	PValue	FDR	state	pac_wt.cpm	pac_ko.cpm
Abhd16b	-5.36296	1.662	4.42441e-06	0.000349282	D	5.58827	0.121994
Ace3	-6.72031	3.81621	3.36101e-11	7.49176e-09	D	27.2033	0.243987
Acot10	-8.92398	1.90581	1.12212e-07	1.34987e-05	D	6.85354	0
Acsbg2	-7.58486	5.21117	1.15106e-14	8.44207e-12	D	72.9638	0.365981
Acsl1	-3.33434	6.50839	4.00767e-06	0.00032084	D	165.012	16.3471
Actg2	-5.07705	4.58001	1.56657e-09	2.52607e-07	D	45.7605	1.34193
Actl10	-8.73491	1.73125	3.44558e-07	3.59352e-05	D	6.01002	0
Actl7a	-3.12253	5.54222	1.61894e-05	0.00108341	D	82.9805	9.5155
Actrt2	-9.23527	5.37358	1.4912e-16	3.08218e-13	D	82.0315	0.121994
Actrt3	-8.94596	1.9262	9.83586e-08	1.18951e-05	D	6.95897	0
Adam1a	-6.81577	4.45669	1.92173e-12	6.33517e-10	D	42.8082	0.365981
Adam29	-9.64191	2.58023	1.7365e-09	2.76091e-07	D	11.282	0
Adam4	-5.32501	2.4907	1.82151e-07	2.0811e-05	D	10.333	0.243987
Adcy10	-4.35032	6.5009	1.10485e-08	1.56999e-06	D	171.971	8.41755
Adcy2	-3.67772	1.53902	0.000180606	0.00922753	D	4.85019	0.365981
Adig	-8.11331	1.1688	7.72046e-06	0.000564412	D	3.90124	0
Adtrp	-4.71135	1.93007	5.07388e-06	0.000397792	D	6.7481	0.243987
AI507597	-11.3504	4.23441	3.20144e-14	2.07965e-11	D	36.9037	0
Aif1	-6.67811	5.0281	1.05894e-12	3.94689e-10	D	63.896	0.609968
Akap1	-4.28289	6.416	1.72386e-08	2.31916e-06	D	161.743	8.29556
Akap4	-4.37247	7.46485	7.41702e-09	1.08098e-06	D	336.35	16.2251
Aknad1	-4.38455	1.63958	2.65437e-05	0.00169047	D	5.37739	0.243987
Alas2	-4.03669	2.76817	6.04803e-06	0.000453822	D	12.2309	0.731961
Allc	-8.43818	5.50024	3.72363e-16	4.98003e-13	D	89.5177	0.243987
Amph	-7.55021	0.678543	0.000125561	0.00665445	D	2.63598	0
Ank2	-3.85108	4.79433	4.74587e-07	4.83866e-05	D	51.2434	3.53781
Ankrd53	-5.2282	2.93397	4.31463e-08	5.51109e-06	D	14.2343	0.365981
Ankrd9	-4.08041	2.56162	9.37092e-06	0.00067357	D	10.5439	0.609968
Antxrl	-8.21686	4.36996	1.40226e-13	6.93083e-11	D	40.4886	0.121994
Apol7b	-7.66067	0.772995	7.44607e-05	0.00418009	D	2.84685	0
Aqp7	-5.20404	4.25495	2.04843e-09	3.23424e-07	D	36.4819	0.975948
Arhgef2	-4.08106	5.50161	8.57781e-08	1.05419e-05	D	84.8784	5.00173
Arrdc5	-4.46003	3.71498	1.33547e-07	1.54915e-05	D	24.4618	1.09794
Asb15	-4.88094	2.08319	2.16178e-06	0.000186883	D	7.59161	0.243987
Asb17	-10.9492	3.84158	4.48649e-13	1.88898e-10	D	27.9413	0
Asb9	-4.29737	3.00577	1.35949e-06	0.000124134	D	14.656	0.731961
Atp1a4	-6.12917	6.1325	5.62265e-13	2.3243e-10	D	137.598	1.9519
AY702102	-8.83254	1.82121	1.93558e-07	2.17858e-05	D	6.43178	0
Banf2	-8.80875	1.79925	2.22885e-07	2.44807e-05	D	6.32634	0
BC048507	-4.20448	1.48238	6.80293e-05	0.00388622	D	4.74476	0.243987
BC048562	-3.85972	2.06857	2.92624e-05	0.00182276	D	7.27529	0.487974
BC049762	-2.85585	4.45896	8.93437e-05	0.00494238	D	38.0635	5.24572
Bpifa3	-9.79508	2.7261	6.93525e-10	1.23187e-07	D	12.5472	0
Btnl10	-3.45255	1.71632	0.000193372	0.0098136	D	5.48283	0.487974
Cabs1	-9.28985	5.4276	1.02876e-16	2.59887e-13	D	85.1947	0.121994
Calr3	-4.02949	3.46249	1.20913e-06	0.00011313	D	20.1389	1.21994
Capza3	-8.17107	4.32509	1.89108e-13	8.95743e-11	D	39.2233	0.121994
Car2	-5.47723	3.55772	7.29683e-09	1.07033e-06	D	22.3531	0.487974
Catsper1	-6.03854	4.65833	3.04618e-11	6.85722e-09	D	49.0291	0.731961
Catsper3	-7.17932	3.36107	1.18143e-10	2.35622e-08	D	19.7171	0.121994
Catsper4	-6.42204	4.07374	2.49274e-11	5.72475e-09	D	32.5807	0.365981
Ccdc159	-3.32307	2.82833	5.80162e-05	0.0033822	D	12.3364	1.21994
Ccdc182	-5.38986	1.68618	4.42441e-06	0.000349282	D	5.69371	0.121994
Ccdc183	-5.70384	4.54923	1.41263e-10	2.76876e-08	D	45.2333	0.853955
Ccdc185	-6.49485	4.14434	1.59846e-11	3.95028e-09	D	34.2677	0.365981
Ccdc187	-7.63215	3.79916	6.51154e-12	1.76246e-09	D	26.9924	0.121994
Ccdc27	-11.0337	3.92419	2.56829e-13	1.14496e-10	D	29.6284	0
Ccdc54	-12.3083	5.1791	5.17615e-17	1.96141e-13	D	71.6985	0
Ccdc63	-5.6657	5.0134	4.8038e-11	1.05019e-08	D	62.6308	1.21994
Ccdc91	-2.98697	5.67366	3.15854e-05	0.00196209	D	90.0449	11.3454
Ccin	-11.5285	4.40939	9.74607e-15	7.91381e-12	D	41.7538	0
Ccsap	-6.66629	2.8702	2.87003e-09	4.40898e-07	D	13.8125	0.121994
Cct8l1	-10.1667	3.08238	6.71092e-11	1.38709e-08	D	16.2376	0
Cdrt4	-3.27323	4.11461	1.53411e-05	0.001035	D	30.7882	3.17183
Cdyl	-3.79331	4.83568	7.53411e-07	7.25829e-05	D	52.6141	3.7818
Cfap100	-10.6069	3.5082	4.12031e-12	1.20102e-09	D	22.0368	0
Chd5	-2.80773	6.38134	7.13777e-05	0.00404699	D	145.295	20.7389
Chl1	-3.68348	6.19159	6.35931e-07	6.20537e-05	D	134.962	10.4914
Cldn34c4	-7.6065	0.726559	9.63608e-05	0.00524129	D	2.74141	0
Clmn	-6.48796	5.09674	1.59512e-12	5.57947e-10	D	66.9538	0.731961
Cngb3	-8.4264	1.44971	1.71836e-06	0.00015321	D	4.85019	0
Cntnap5b	-6.50341	2.71583	7.69628e-09	1.10749e-06	D	12.3364	0.121994
Cpa5	-10.8003	3.69634	1.17501e-12	4.30889e-10	D	25.1999	0
Cpxcr1	-8.18899	1.23622	6.31674e-06	0.000469338	D	4.11212	0
Creb3l4	-3.57607	5.37278	1.51215e-06	0.000136973	D	75.8106	6.34366
Csnka2ip	-7.2938	4.37415	8.00895e-13	3.16945e-10	D	40.4886	0.243987
Cst13	-6.09302	2.33064	8.6925e-08	1.06254e-05	D	9.27863	0.121994
Cstl1	-8.90165	1.88513	1.28242e-07	1.50295e-05	D	6.7481	0
Cxxc5	-3.26669	3.8083	2.28103e-05	0.00146917	D	24.7782	2.56186
Cylc1	-10.019	2.94038	1.69255e-10	3.26117e-08	D	14.656	0
Cylc2	-3.16486	4.5172	2.06988e-05	0.00134845	D	40.594	4.51376
Cyp4f39	-9.29325	2.25063	1.46906e-08	2.00222e-06	D	8.85688	0
Cypt12	-8.23922	4.39188	1.19561e-13	6.17802e-11	D	41.1212	0.121994
Cypt2	-4.97763	2.17114	1.22501e-06	0.000113218	D	8.1188	0.243987
Cypt3	-6.38807	2.60701	1.48786e-08	2.01357e-06	D	11.3874	0.121994
Dnajb7	-10.529	3.43254	7.06661e-12	1.86821e-09	D	20.8769	0
Dnajb8	-8.66794	4.81329	6.92844e-15	6.301e-12	D	55.3555	0.121994
Dnajc5b	-11.399	4.28215	2.32945e-14	1.64286e-11	D	38.1689	0
Dpysl3	-4.56602	5.3641	6.68708e-09	9.87256e-07	D	78.3412	3.29383
Dsg1a	-9.93353	2.85848	2.99224e-10	5.57636e-08	D	13.8125	0
Dydc2	-8.29555	1.33168	3.54078e-06	0.000287511	D	4.42844	0
Entpd4	-4.01529	2.95854	3.95911e-06	0.000318072	D	14.0234	0.853955
Eqtn	-5.10265	3.75845	1.18601e-08	1.65431e-06	D	25.6217	0.731961
Fam166a	-6.21969	4.58048	2.18444e-11	5.06791e-09	D	46.4986	0.609968
Fam187b	-6.92847	4.56678	9.29282e-13	3.52136e-10	D	46.2877	0.365981
Fam19a3	-4.03509	1.33658	0.000160239	0.00826121	D	4.21756	0.243987
Fam205a1	-5.21825	2.39193	3.20078e-07	3.38553e-05	D	9.59495	0.243987
Fam205c	-7.61579	5.24165	9.34296e-15	7.86747e-12	D	74.5454	0.365981
Fam209	-5.09073	3.74714	1.28359e-08	1.77949e-06	D	25.4108	0.731961
Fam229a	-6.62217	4.26806	6.94545e-12	1.85778e-09	D	37.4308	0.365981
Fam71a	-6.04938	3.17189	2.29753e-09	3.60252e-07	D	17.0811	0.243987
Fam71b	-11.1614	4.04906	1.11716e-13	6.04756e-11	D	32.3698	0
Fam71d	-5.46047	5.29034	6.62331e-11	1.38709e-08	D	75.8106	1.70791
Fam71e1	-3.57833	4.85087	2.09054e-06	0.000183516	D	52.6141	4.39177
Fam71e2	-8.62888	5.68902	1.0281e-16	2.59887e-13	D	102.17	0.243987
Fam71f1	-3.72906	5.10303	7.69755e-07	7.38445e-05	D	63.2634	4.75775
Fam71f2	-3.78813	5.32954	5.39567e-07	5.41823e-05	D	74.3345	5.36772
Fbxo39	-9.57295	2.51476	2.71466e-09	4.22743e-07	D	10.7548	0
Fhl5	-7.66004	3.82627	5.35969e-12	1.48607e-09	D	27.5196	0.121994
Fndc8	-6.83238	3.02839	1.02555e-09	1.77991e-07	D	15.4995	0.121994
Fscb	-6.91467	5.26022	2.21055e-13	1.02569e-10	D	75.2835	0.609968
Fscn3	-7.85121	4.01242	1.56367e-12	5.55493e-10	D	31.4208	0.121994
G6pd2	-9.68175	2.61811	1.34054e-09	2.17704e-07	D	11.5983	0
Galntl5	-8.96037	5.10177	9.63324e-16	1.18537e-12	D	67.7973	0.121994
Gapdhs	-7.34322	7.03431	2.77567e-16	3.94423e-13	D	259.802	1.58592
Glt6d1	-7.99178	1.06124	1.44592e-05	0.000984267	D	3.58493	0
Gm10731	-5.62879	2.77419	2.91593e-08	3.83218e-06	D	12.7581	0.243987
Gm11149	-8.2609	1.30057	4.27844e-06	0.000340121	D	4.323	0
Gm11213	-8.68351	1.68404	4.65727e-07	4.76972e-05	D	5.79915	0
Gm11780	-11.5065	4.38774	1.14108e-14	8.44207e-12	D	41.1212	0
Gm11978	-4.13909	1.42585	9.50166e-05	0.00520554	D	4.53388	0.243987
Gm136	-3.81821	2.78065	1.17835e-05	0.000819293	D	12.2309	0.853955
Gm14151	-9.69479	2.63052	1.23156e-09	2.04385e-07	D	11.7037	0
Gm15104	-4.71135	1.93007	5.07388e-06	0.000397792	D	6.7481	0.243987
Gm19395	-7.99178	1.06124	1.44592e-05	0.000984267	D	3.58493	0
Gm20611	-8.2609	1.30057	4.27844e-06	0.000340121	D	4.323	0
Gm29508	-8.60279	1.61015	6.35441e-07	6.20537e-05	D	5.48283	0
Gm4787	-7.88469	4.04508	1.23517e-12	4.45761e-10	D	32.1589	0.121994
Gm4907	-8.11331	1.1688	7.72046e-06	0.000564412	D	3.90124	0
Gm5092	-8.03343	1.09801	1.16786e-05	0.000814494	D	3.69037	0
Gm5334	-5.25005	1.56091	8.22534e-06	0.00059748	D	5.16651	0.121994
Gm5460	-8.32939	1.36212	2.94065e-06	0.000245803	D	4.53388	0
Gm5767	-8.80875	1.79925	2.22885e-07	2.44807e-05	D	6.32634	0
Gm5893	-7.83172	3.99342	1.73295e-12	5.96976e-10	D	30.9991	0.121994
Gm5901	-9.55876	2.5013	2.97568e-09	4.54062e-07	D	10.6493	0
Gm5941	-4.70415	2.83154	2.66421e-07	2.85724e-05	D	13.0744	0.487974
Gm614	-8.6302	1.63521	5.43348e-07	5.41823e-05	D	5.58827	0
Gm6588	-4.35203	3.26714	6.02931e-07	5.98613e-05	D	17.7138	0.853955
Gm6760	-6.02601	2.26832	1.31616e-07	1.53457e-05	D	8.85688	0.121994
Gm6812	-8.07392	1.13385	9.4751e-06	0.00067357	D	3.7958	0
Gm7073	-8.4264	1.44971	1.71836e-06	0.00015321	D	4.85019	0
Gm732	-5.02831	1.36454	2.69459e-05	0.00171129	D	4.42844	0.121994
Gm9047	-7.6065	0.726559	9.63608e-05	0.00524129	D	2.74141	0
Gm9999	-7.48398	3.65538	1.67995e-11	4.02055e-09	D	24.3564	0.121994
Gpat3	-4.51835	2.66052	7.73518e-07	7.38937e-05	D	11.4929	0.487974
Gpd2	-5.64686	5.97888	1.1775e-11	2.97463e-09	D	122.942	2.43987
Grip1	-5.12605	4.62698	1.14628e-09	1.93051e-07	D	47.3421	1.34193
Grip1os1	-7.94888	1.02349	1.79859e-05	0.00119569	D	3.47949	0
Gtsf1l	-12.0838	4.95705	2.39651e-16	3.69851e-13	D	61.3655	0
H1fnt	-8.63631	5.69637	9.73811e-17	2.59887e-13	D	102.698	0.243987
H2afb1	-10.176	3.09137	6.71092e-11	1.38709e-08	D	16.343	0
H2al1n	-8.03343	1.09801	1.16786e-05	0.000814494	D	3.69037	0
H2al3	-4.41249	1.66416	2.28759e-05	0.00146923	D	5.48283	0.243987
Hdac11	-3.67983	3.70795	3.19524e-06	0.000265135	D	23.6183	1.8299
Heatr9	-9.07124	2.04275	5.21778e-08	6.51821e-06	D	7.59161	0
Hemgn	-10.176	3.09137	6.71092e-11	1.38709e-08	D	16.343	0
Hils1	-12.4744	5.34364	1.68272e-17	9.56458e-14	D	80.45	0
Hmgb1-rs17	-5.61174	1.8871	1.24339e-06	0.000113991	D	6.64266	0.121994
Hmgb4	-7.6096	4.6835	9.73939e-14	5.40085e-11	D	50.3998	0.243987
Hs3st4	-7.76327	0.861522	4.53239e-05	0.00270835	D	3.05773	0
Hsfy2	-10.5649	3.46743	5.50998e-12	1.50934e-09	D	21.4041	0
Hspa1l	-5.01943	5.94903	3.04983e-10	5.59201e-08	D	119.146	3.65981
Hyal5	-7.59795	3.76595	7.94156e-12	2.07539e-09	D	26.3598	0.121994
Hypm	-5.31024	2.477	1.99661e-07	2.2362e-05	D	10.2276	0.243987
Ica1	-4.3095	3.57479	3.21037e-07	3.38553e-05	D	22.0368	1.09794
Inhbb	-2.97696	3.41426	0.000126499	0.00668858	D	18.3464	2.31788
Iqcf1	-7.05878	3.24516	2.53596e-10	4.7651e-08	D	18.1355	0.121994
Iqcf3	-7.73015	5.75291	9.90593e-16	1.18537e-12	D	106.599	0.487974
Iqcf4	-7.48398	3.65538	1.67995e-11	4.02055e-09	D	24.3564	0.121994
Iqcf5	-6.15706	2.39036	5.83643e-08	7.2512e-06	D	9.70039	0.121994
Irf6	-4.1303	1.93201	1.93925e-05	0.0012743	D	6.64266	0.365981
Irgc1	-6.46305	6.62877	6.67024e-14	3.88858e-11	D	194.957	2.19588
Isg20	-3.81198	3.1189	5.58124e-06	0.0004287	D	15.605	1.09794
Izumo2	-7.13231	3.31582	1.54169e-10	2.99589e-08	D	19.0845	0.121994
Klf17	-5.91927	2.1694	2.26746e-07	2.47851e-05	D	8.22424	0.121994
Klhl10	-3.16114	5.88881	1.24566e-05	0.000858224	D	105.966	11.8334
Krt88	-3.11788	3.74216	4.6417e-05	0.00275899	D	23.4075	2.68386
Lelp1	-11.5065	4.38774	1.14108e-14	8.44207e-12	D	41.1212	0
Lemd1	-3.60555	2.38354	5.94081e-05	0.00345448	D	9.06775	0.731961
Lexm	-4.45618	2.22311	3.45984e-06	0.00028296	D	8.32968	0.365981
Lmnb2	-3.41787	4.53798	6.28081e-06	0.000468199	D	41.8593	3.90379
Lmntd1	-4.10967	3.04447	2.39097e-06	0.000205913	D	14.9723	0.853955
LOC101055749	-8.07392	1.13385	9.4751e-06	0.00067357	D	3.7958	0
Lrrc52	-5.10295	2.2858	6.44788e-07	6.26491e-05	D	8.85688	0.243987
Lrrc57	-2.90568	4.25054	8.60107e-05	0.00478127	D	33.0024	4.39177
Lrrc72	-8.6571	1.65984	5.43348e-07	5.41823e-05	D	5.69371	0
Lrrc74a	-7.0796	4.16513	3.24586e-12	9.71025e-10	D	34.9003	0.243987
Lrrc8b	-4.48194	6.27465	5.72492e-09	8.5073e-07	D	147.509	6.58765
Lrrd1	-4.68868	1.90972	5.76672e-06	0.000439973	D	6.64266	0.243987
Ly6g6c	-5.4422	1.73335	3.28997e-06	0.000272003	D	5.90458	0.121994
Lyzl1	-2.88586	3.54037	0.000155983	0.00807842	D	19.928	2.68386
Lyzl4os	-9.07124	2.04275	5.21778e-08	6.51821e-06	D	7.59161	0
Lyzl6	-7.69281	3.85814	4.26396e-12	1.22716e-09	D	28.1522	0.121994
Mbd3l1	-5.08051	3.18242	2.95969e-08	3.86733e-06	D	16.9757	0.487974
Mex3d	-3.99094	5.78412	1.23734e-07	1.46522e-05	D	103.014	6.46566
Mgat4e	-3.72461	2.87881	1.24244e-05	0.000858224	D	13.0744	0.975948
Micalcl	-6.94805	4.58592	8.08534e-13	3.16945e-10	D	46.9204	0.365981
Mir1956	-7.81196	0.903789	3.56805e-05	0.00219252	D	3.16317	0
Morn3	-7.2938	4.37415	8.00895e-13	3.16945e-10	D	40.4886	0.243987
Mroh7	-8.10522	5.17129	3.54197e-15	3.35543e-12	D	71.0659	0.243987
Necab3	-4.36202	2.13837	5.95245e-06	0.000449618	D	7.80249	0.365981
Nkx2-6	-8.90165	1.88513	1.28242e-07	1.50295e-05	D	6.7481	0
Oaz3	-6.84423	7.22545	3.41461e-15	3.35543e-12	D	295.967	2.56186
Odf3	-11.568	4.44827	7.53407e-15	6.58826e-12	D	42.9137	0
Odf3b	-8.03343	1.09801	1.16786e-05	0.000814494	D	3.69037	0
Olfr112	-8.36246	1.39192	2.45054e-06	0.000209457	D	4.63932	0
Oxct2a	-7.54509	3.71463	1.14698e-11	2.93007e-09	D	25.4108	0.121994
Oxct2b	-7.81693	3.979	1.92262e-12	6.33517e-10	D	30.6828	0.121994
P2rx2	-3.07679	3.64096	6.26783e-05	0.00361689	D	21.7204	2.56186
Paqr5	-5.51747	3.59606	5.58281e-09	8.35071e-07	D	22.9857	0.487974
Pdilt	-5.75508	4.78599	5.96057e-11	1.29066e-08	D	53.4576	0.975948
Pdzd2	-3.16028	4.01435	2.88314e-05	0.00180581	D	28.4685	3.17183
Pdzk1	-6.89637	5.24224	2.48414e-13	1.12959e-10	D	74.3345	0.609968
Pex5l	-6.14408	3.26216	1.29435e-09	2.13249e-07	D	18.2409	0.243987
Pfn3	-5.27911	1.58686	7.01868e-06	0.00051643	D	5.27195	0.121994
Phospho1	-4.16882	3.84482	3.21637e-07	3.38553e-05	D	26.5706	1.46392
Pip5kl1	-7.49164	0.628837	0.000125561	0.00665445	D	2.53054	0
Pitpnm2os1	-7.76327	0.861522	4.53239e-05	0.00270835	D	3.05773	0
Pkd1l3	-4.37071	3.77821	1.66276e-07	1.90931e-05	D	25.5162	1.21994
Pkib	-5.00705	3.1135	4.48109e-08	5.69173e-06	D	16.1322	0.487974
Pknox2	-3.17451	3.65841	4.04339e-05	0.00246462	D	22.1422	2.43987
Plcz1	-4.34849	4.73181	4.74274e-08	5.9906e-06	D	49.9781	2.43987
Plekha6	-4.20933	4.52861	1.23008e-07	1.46424e-05	D	43.1246	2.31788
Pmis2	-4.78126	2.51918	6.05924e-07	5.98969e-05	D	10.4385	0.365981
Pp2d1	-3.68255	3.279	6.55052e-06	0.000485123	D	17.3974	1.34193
Ppm1j	-6.84857	3.9405	1.432e-11	3.5778e-09	D	29.7338	0.243987
Ppp1r2-ps9	-8.29555	1.33168	3.54078e-06	0.000287511	D	4.42844	0
Ppp2r2b	-3.98612	2.72249	8.1369e-06	0.000592951	D	11.8092	0.731961
Prkar2a	-4.53386	4.50006	2.0194e-08	2.66937e-06	D	42.7028	1.8299
Prkcq	-6.13699	4.19153	1.10601e-10	2.2452e-08	D	35.3221	0.487974
Prkg1	-4.97763	2.17114	1.22501e-06	0.000113218	D	8.1188	0.243987
Prm1	-8.78065	7.10771	7.01976e-19	8.91153e-15	D	274.458	0.609968
Prm2	-7.08259	8.73504	1.94775e-16	3.40647e-13	D	845.199	6.22167
Prm3	-10.6611	3.56083	2.96596e-12	8.9912e-10	D	22.8803	0
Prox2	-3.80221	3.11007	5.91477e-06	0.000449618	D	15.4995	1.09794
Prr30	-8.25473	5.87309	1.24685e-16	2.83483e-13	D	116.088	0.365981
Prss37	-10.4995	3.40401	8.2293e-12	2.12615e-09	D	20.4552	0
Prss51	-8.22539	1.26876	5.18875e-06	0.000402633	D	4.21756	0
Prss52	-8.78455	1.77694	2.57175e-07	2.77115e-05	D	6.2209	0
Prss55	-10.3916	3.29944	1.63784e-11	4.00407e-09	D	18.979	0
Ptpn7	-7.85906	0.944828	2.82471e-05	0.0017741	D	3.26861	0
Ptprv	-3.51858	3.00082	2.05662e-05	0.00134366	D	14.1288	1.21994
Pwwp2b	-6.01746	5.4907	3.4983e-12	1.03295e-09	D	87.8307	1.34193
Rassf9	-7.76327	0.861522	4.53239e-05	0.00270835	D	3.05773	0
Rec8	-3.15687	4.11582	2.59525e-05	0.00165746	D	30.5773	3.41582
Retreg1	-3.21955	3.20114	4.53854e-05	0.00270835	D	16.0267	1.70791
Rffl	-2.87119	4.33388	9.25617e-05	0.00508795	D	34.9003	4.75775
Rnf133	-7.01272	4.10001	5.03296e-12	1.41271e-09	D	33.3187	0.243987
Rnf148	-9.32715	2.28251	1.18591e-08	1.65431e-06	D	9.06775	0
Rnf151	-11.8179	4.69446	1.43413e-15	1.63031e-12	D	51.0325	0
Ropn1	-8.76873	4.91263	3.47693e-15	3.35543e-12	D	59.3622	0.121994
Samd4	-7.24701	5.58739	2.38451e-14	1.64286e-11	D	94.7897	0.609968
Satl1	-9.74581	2.67911	9.58988e-10	1.6772e-07	D	12.1255	0
Saxo1	-10.1094	3.02726	9.87265e-11	2.0222e-08	D	15.605	0
Saxo1os	-7.71288	0.817952	5.79138e-05	0.0033822	D	2.95229	0
Scp2d1	-11.3504	4.23441	3.20144e-14	2.07965e-11	D	36.9037	0
2018-09-04	-3.612	3.82166	5.29483e-06	0.000409467	D	25.5162	2.07389
Sez6l	-5.13684	2.31694	5.25205e-07	5.30714e-05	D	9.06775	0.243987
Sh3d21	-4.79106	6.27709	1.07024e-09	1.82954e-07	D	148.985	5.36772
Sh3rf2	-5.84458	4.21689	2.48055e-10	4.69982e-08	D	35.8493	0.609968
Slc22a14	-4.96165	5.16569	1.31308e-09	2.14779e-07	D	68.8517	2.19588
Slc25a41	-4.63743	1.02622	0.000157376	0.00813207	D	3.37405	0.121994
Slc26a10	-4.72454	1.10068	0.000103439	0.00561287	D	3.58493	0.121994
Slc36a3	-3.85972	2.06857	2.92624e-05	0.00182276	D	7.27529	0.487974
Slfnl1	-3.86777	5.07714	3.93488e-07	4.04812e-05	D	62.5253	4.26977
Smcp	-8.39325	7.38639	1.17587e-18	8.91153e-15	D	332.871	0.975948
Smim23	-10.0799	2.99888	1.20435e-10	2.38105e-08	D	15.2887	0
Sncaip	-5.93762	2.18637	2.02888e-07	2.26121e-05	D	8.32968	0.121994
Sox5	-2.74107	4.62963	0.000151266	0.00787	D	42.4919	6.34366
Sox5os3	-8.07392	1.13385	9.4751e-06	0.00067357	D	3.7958	0
Spaca7	-4.28164	3.54895	3.82849e-07	3.97464e-05	D	21.615	1.09794
Spam1	-7.17932	3.36107	1.18143e-10	2.35622e-08	D	19.7171	0.121994
Spanxn4	-6.50341	2.71583	7.69628e-09	1.10749e-06	D	12.3364	0.121994
Spata19	-3.56787	5.02637	1.83467e-06	0.000162308	D	59.4676	5.00173
Spata25	-9.29325	2.25063	1.46906e-08	2.00222e-06	D	8.85688	0
Spata3	-8.82155	4.96473	2.46097e-15	2.66441e-12	D	61.5764	0.121994
Spata31	-12.0789	4.95214	2.44008e-16	3.69851e-13	D	61.1546	0
Spata31d1b	-7.94034	4.0994	8.62015e-13	3.32183e-10	D	33.4242	0.121994
Spata31d1c	-6.07656	2.31532	9.62699e-08	1.17048e-05	D	9.17319	0.121994
Spata31d1d	-7.11829	4.20283	2.54749e-12	7.827e-10	D	35.8493	0.243987
Spata32	-3.21728	3.09662	5.58989e-05	0.00328402	D	14.8669	1.58592
Spata9	-6.8615	3.0562	8.44952e-10	1.48921e-07	D	15.8159	0.121994
Spatc1	-6.27993	3.93621	6.23644e-11	1.33766e-08	D	29.5229	0.365981
Spem1	-5.82071	5.01541	2.55328e-11	5.80514e-09	D	62.8416	1.09794
Spem2	-12.1205	4.99333	1.86844e-16	3.40647e-13	D	62.9471	0
Spert	-4.55267	5.87624	4.89581e-09	7.3716e-07	D	111.976	4.75775
Sppl2c	-7.3839	5.01335	4.45105e-14	2.66313e-11	D	63.4743	0.365981
Spsb1	-3.38192	3.13089	2.75326e-05	0.00174368	D	15.3941	1.46392
Spta1	-4.34243	2.1208	6.65856e-06	0.000491523	D	7.69705	0.365981
Spz1	-4.99773	6.99114	1.96007e-10	3.74489e-08	D	245.989	7.68559
Sqor	-3.65311	5.47068	9.42494e-07	8.85477e-05	D	81.5044	6.46566
St6galnac2	-6.63777	6.33692	3.31021e-14	2.09058e-11	D	159.318	1.58592
St8sia3	-6.37462	3.48291	3.03286e-10	5.59201e-08	D	21.4041	0.243987
Stambpl1	-4.25529	2.96718	1.75529e-06	0.000155892	D	14.2343	0.731961
Stk-ps2	-4.97763	2.17114	1.22501e-06	0.000113218	D	8.1188	0.243987
Ston1	-4.2692	2.73272	3.34433e-06	0.000275496	D	12.02	0.609968
Stpg3	-10.7133	3.61159	2.06326e-12	6.60708e-10	D	23.7238	0
Sun5	-11.0183	3.90905	2.86436e-13	1.25239e-10	D	29.312	0
Tas1r1	-5.15916	1.48006	1.34468e-05	0.000920865	D	4.85019	0.121994
Tbc1d21	-11.1472	4.03519	1.23508e-13	6.24016e-11	D	32.0535	0
Tcp11x2	-4.10727	1.91167	2.19975e-05	0.00142488	D	6.53722	0.365981
Tctex1d1	-2.95099	3.23706	0.000132238	0.00692756	D	16.1322	2.07389
Tepp	-9.73322	2.66712	1.04166e-09	1.79418e-07	D	12.02	0
Tescl	-4.38346	3.64355	2.09422e-07	2.32265e-05	D	23.1966	1.09794
Tex13a	-6.66629	2.8702	2.87003e-09	4.40898e-07	D	13.8125	0.121994
Tex13c1	-9.13003	2.09763	3.63334e-08	4.6671e-06	D	7.90793	0
Tex24	-6.24808	2.4755	3.62368e-08	4.6671e-06	D	10.333	0.121994
Tex29	-2.79658	3.94511	0.000181095	0.00923179	D	26.3598	3.7818
Tex35	-6.79119	3.88487	2.1341e-11	5.00216e-09	D	28.574	0.243987
Tex36	-11.0079	3.89888	3.08252e-13	1.32234e-10	D	29.1012	0
Tex37	-3.10287	3.36871	5.99303e-05	0.00346711	D	17.9246	2.07389
Tex38	-4.44508	3.14186	6.17963e-07	6.08225e-05	D	16.2376	0.731961
Tex43	-6.76206	2.96132	1.63613e-09	2.61965e-07	D	14.7615	0.121994
Tex44	-4.07804	3.36118	1.24116e-06	0.000113991	D	18.7681	1.09794
Tex48	-7.78182	3.94479	2.46037e-12	7.66286e-10	D	29.9447	0.121994
Tex50	-5.50449	2.65777	6.43493e-08	7.95133e-06	D	11.7037	0.243987
Tmc5	-3.62108	3.98598	3.94518e-06	0.000318072	D	28.6794	2.31788
Tmco2	-11.1567	4.04445	1.15503e-13	6.10715e-11	D	32.2643	0
Tmco5	-2.94409	5.2699	4.64766e-05	0.00275899	D	67.6918	8.78353
Tmco5b	-8.22539	1.26876	5.18875e-06	0.000402633	D	4.21756	0
Tmem132cos	-7.76327	0.861522	4.53239e-05	0.00270835	D	3.05773	0
Tmem144	-4.17902	3.1079	1.56851e-06	0.000140955	D	15.7104	0.853955
Tmem191c	-5.40041	3.48466	1.15908e-08	1.63683e-06	D	21.1932	0.487974
Tmem210	-9.90014	2.82651	3.73727e-10	6.79765e-08	D	13.4962	0
Tmem239	-9.24087	2.20143	1.82837e-08	2.43099e-06	D	8.54056	0
Tmem247	-4.27475	4.15942	1.17245e-07	1.40299e-05	D	33.3187	1.70791
Tmem255a	-2.87256	4.0554	0.000119239	0.00637884	D	28.6794	3.90379
Tmem270	-3.18707	2.84032	9.26465e-05	0.00508795	D	12.3364	1.34193
Tmem56	-3.26054	3.80284	2.36398e-05	0.00151401	D	24.6727	2.56186
Tmem63c	-3.05924	3.06151	0.000104269	0.00563969	D	14.3397	1.70791
Tmem95	-4.68164	1.06394	0.000127312	0.00670038	D	3.47949	0.121994
Tmigd3	-4.73047	3.15801	2.39127e-07	2.58895e-05	D	16.5539	0.609968
Tmsb15a	-7.49164	0.628837	0.000125561	0.00665445	D	2.53054	0
Tnfaip2	-3.54273	4.35705	3.37663e-06	0.000277152	D	37.1145	3.17183
Tnp1	-7.77193	7.08591	3.53991e-17	1.60967e-13	D	269.713	1.21994
Tnp2	-8.49195	7.29532	1.04482e-18	8.91153e-15	D	312.521	0.853955
Tppp2	-7.82188	3.98382	1.85697e-12	6.30151e-10	D	30.7882	0.121994
Trim17	-3.08238	5.45041	2.08936e-05	0.00135725	D	77.6031	9.14951
Trim42	-9.13003	2.09763	3.63334e-08	4.6671e-06	D	7.90793	0
Trim66	-3.24763	3.12321	4.71484e-05	0.00279158	D	15.1832	1.58592
Trim80	-5.37275	4.23025	1.18093e-09	1.97424e-07	D	35.9547	0.853955
Triml1	-5.48207	3.17293	9.44786e-09	1.35098e-06	D	16.9757	0.365981
Trp53tg5	-9.72052	2.65502	1.13224e-09	1.92109e-07	D	11.9146	0
Tsks	-3.55099	6.01877	1.44163e-06	0.000131107	D	118.83	10.1255
Tspan6	-2.94154	3.22892	0.000132238	0.00692756	D	16.0267	2.07389
Tssk2	-5.47719	5.58231	3.63868e-11	8.03194e-09	D	92.9972	2.07389
Tssk3	-7.80699	3.96931	2.06171e-12	6.60708e-10	D	30.4719	0.121994
Tssk5	-5.18624	2.3624	3.8906e-07	4.02076e-05	D	9.38407	0.243987
Tssk6	-5.68792	4.06591	6.62804e-10	1.18658e-07	D	32.1589	0.609968
Ttc39a	-4.11803	4.51583	1.92065e-07	2.17858e-05	D	42.5974	2.43987
Ttll2	-7.6065	0.726559	9.63608e-05	0.00524129	D	2.74141	0
Tuba8	-8.17494	4.32888	1.83968e-13	8.89934e-11	D	39.3287	0.121994
Txndc8	-10.7004	3.59907	2.25644e-12	7.12533e-10	D	23.5129	0
Ube4bos3	-7.66067	0.772995	7.44607e-05	0.00418009	D	2.84685	0
Ubl4b	-11.3043	4.18922	4.31331e-14	2.65047e-11	D	35.7438	0
Ubqln3	-4.36719	5.93594	1.47067e-08	2.00222e-06	D	116.088	5.6117
Ubqlnl	-7.65417	4.72726	7.23123e-14	4.11023e-11	D	51.9814	0.243987
Usp50	-7.45879	3.63098	2.00004e-11	4.73675e-09	D	23.9347	0.121994
Wbp2nl	-4.16436	2.63747	5.74907e-06	0.000439973	D	11.1765	0.609968
Wdr64	-3.44536	3.96793	8.51784e-06	0.000616756	D	28.0468	2.56186
Wnt3	-4.1753	1.97182	1.5141e-05	0.00102454	D	6.85354	0.365981
Zcchc13	-4.43783	2.20656	3.84753e-06	0.000311308	D	8.22424	0.365981
Zdhhc19	-10.5791	3.48115	4.99652e-12	1.41271e-09	D	21.615	0
Zdhhc25	-6.61021	2.81696	4.14663e-09	6.28519e-07	D	13.2853	0.121994
a	6.12978	-0.541782	0.0219002	0.387187	M	0	0.975948
A1bg	5.12548e-15	-2.14415	1	1	M	0	0
A1cf	-0.125904	1.40817	0.931075	1	M	2.53054	2.31788
A2m	2.43621	2.29701	0.00251728	0.0799343	M	1.47615	8.05157
A2ml1	0.201995	-0.821308	1	1	M	0.316317	0.365981
A3galt2	-4.54668	-1.34301	0.285714	1	M	0.316317	0
A4galt	0.681331	-0.138753	0.670342	1	M	0.527195	0.853955
A4gnt	5.12548e-15	-2.14415	1	1	M	0	0
A630020A06	0.208231	0.665905	0.89207	1	M	1.26527	1.46392
AA387883	-3.08018	-1.82439	1	1	M	0.105439	0
AA388235	5.12548e-15	-2.14415	1	1	M	0	0
AA413626	-0.725021	-1.33855	1	1	M	0.210878	0.121994
AA414768	-1.51753	1.63659	0.0734022	0.828225	M	4.21756	1.46392
AA465934	1.6685	-1.13913	0.658385	1	M	0.105439	0.365981
AA467197	0.0338642	6.2515	0.960859	1	M	75.0726	76.8559
AA536875	-0.725021	-1.33855	1	1	M	0.210878	0.121994
AA543186	-0.309035	1.75649	0.734719	1	M	3.47949	2.80585
AA543401	5.12548e-15	-2.14415	1	1	M	0	0
AA545190	5.12548e-15	-2.14415	1	1	M	0	0
AA619741	5.12548e-15	-2.14415	1	1	M	0	0
AA792892	-3.08018	-1.82439	1	1	M	0.105439	0
AA986860	-1.31569	1.2616	0.146868	1	M	3.05773	1.21994
Aaas	-0.138644	5.08478	0.843392	1	M	35.3221	32.0843
Aacs	0.409327	4.94909	0.540388	1	M	26.3598	35.0121
Aadac	5.12548e-15	-2.14415	1	1	M	0	0
Aadacl2	5.12548e-15	-2.14415	1	1	M	0	0
Aadacl3	5.12548e-15	-2.14415	1	1	M	0	0
Aadacl4	5.12548e-15	-2.14415	1	1	M	0	0
Aadat	5.12548e-15	-2.14415	1	1	M	0	0
Aaed1	0.986483	3.33507	0.15995	1	M	6.64266	13.1753
Aagab	-0.421894	4.76678	0.533643	1	M	30.8936	23.0568
Aak1	0.299886	5.83641	0.652841	1	M	51.0325	62.8267
Aamdc	0.480609	4.01049	0.490233	1	M	13.2853	18.543
Aamp	0.0598172	9.05677	0.927496	1	M	521.29	543.359
Aanat	-2.65538	-0.456274	0.084472	0.892867	M	0.843512	0.121994
Aar2	-0.0902223	4.96395	0.899008	1	M	31.948	30.0104
Aard	-1.31567	4.56753	0.0540203	0.69351	M	33.4242	13.4193
Aars	-0.0803315	7.55427	0.903505	1	M	192.953	182.502
Aars2	-0.0253406	5.38636	0.976319	1	M	41.9647	41.2338
Aarsd1	-0.0225679	4.58981	0.983644	1	M	24.0401	23.6667
Aasdh	-0.172277	3.75145	0.813689	1	M	14.0234	12.4433
Aasdhppt	0.123714	5.17521	0.858188	1	M	34.3731	37.452
Aass	-0.779666	0.490851	0.545915	1	M	1.47615	0.853955
Aatf	-0.0199892	5.98572	0.978055	1	M	63.5797	62.7047
Aatk	-1.27945	-1.14789	0.658385	1	M	0.316317	0.121994
AB124611	5.12548e-15	-2.14415	1	1	M	0	0
Abat	-0.925369	4.43804	0.175182	1	M	28.0468	14.7612
Abca1	1.22368	6.22358	0.0673414	0.784361	M	44.7061	104.426
Abca13	-5.25875	-0.984153	0.0942029	0.931216	M	0.527195	0
Abca14	-0.377064	6.72751	0.568426	1	M	119.462	91.9831
Abca15	-0.411786	5.66828	0.535684	1	M	57.7806	43.4297
Abca16	0.0648214	6.71068	0.923261	1	M	102.17	106.866
Abca17	-0.367041	6.97987	0.577858	1	M	141.921	110.038
Abca2	0.488502	4.31037	0.476436	1	M	16.343	22.9348
Abca3	0.0583232	3.59231	0.951484	1	M	11.5983	12.0774
Abca4	1.38608	0.627518	0.14853	1	M	0.738073	1.9519
Abca5	0.135624	5.83786	0.841266	1	M	54.3011	59.6548
Abca6	0.343803	0.503797	0.763627	1	M	1.05439	1.34193
Abca7	0.826564	2.69726	0.26422	1	M	4.53388	8.05157
Abca8a	-1.06942	0.970055	0.25882	1	M	2.31966	1.09794
Abca8b	0.204032	-0.558014	1	1	M	0.421756	0.487974
Abca9	-1.54419	1.4159	0.0770135	0.855388	M	3.58493	1.21994
Abcb10	-0.169858	2.8286	0.839163	1	M	7.27529	6.46566
Abcb11	-0.589961	0.549276	0.662736	1	M	1.47615	0.975948
Abcb1a	1.20201	1.3022	0.165529	1	M	1.37071	3.17183
Abcb1b	-0.197527	-0.685733	1	1	M	0.421756	0.365981
Abcb4	-0.167201	1.4966	0.93615	1	M	2.74141	2.43987
Abcb5	-3.08018	-1.82439	1	1	M	0.105439	0
Abcb6	-0.421452	5.52973	0.526422	1	M	52.6141	39.2819
Abcb7	0.654651	1.67612	0.42351	1	M	2.31966	3.65981
Abcb8	-0.0624993	5.85085	0.927819	1	M	58.7295	56.239
Abcb9	0.26191	5.5843	0.696854	1	M	43.4409	52.0912
Abcc1	-0.972061	4.85827	0.150214	1	M	38.0635	19.397
Abcc10	-0.463941	4.00637	0.498541	1	M	18.3464	13.2973
Abcc12	-0.341715	8.04729	0.602814	1	M	295.44	233.13
Abcc2	-0.365247	-0.339275	0.7999	1	M	0.632634	0.487974
Abcc3	0.422046	6.12213	0.524236	1	M	59.3622	79.5398
Abcc4	1.5446	1.527	0.070754	0.810818	M	1.37071	4.02579
Abcc5	0.17805	3.95418	0.799767	1	M	14.3397	16.2251
Abcc6	1.6685	-1.13913	0.658385	1	M	0.105439	0.365981
Abcc8	1.38304	1.60929	0.104716	0.98098	M	1.58159	4.14778
Abcc9	2.17614	2.18513	0.0071666	0.177688	M	1.58159	7.19762
Abcd1	0.961935	3.85653	0.161176	1	M	9.70039	18.909
Abcd2	-3.41619	0.823782	0.00222798	0.0725721	M	2.74141	0.243987
Abcd3	-0.779024	3.6659	0.265663	1	M	15.7104	9.14951
Abcd4	-0.14982	0.17631	1	1	M	0.948951	0.853955
Abce1	0.670617	5.80232	0.313484	1	M	42.9137	68.3164
Abcf1	-0.18291	7.55191	0.781256	1	M	199.28	175.549
Abcf2	0.191285	7.74729	0.771229	1	M	200.44	228.86
Abcf3	-0.133209	6.66571	0.842032	1	M	105.966	96.6189
Abcg1	3.15426	0.844137	0.00383276	0.110446	M	0.316317	2.92784
Abcg2	-0.0419208	3.11206	0.977656	1	M	8.54056	8.29556
Abcg3	-3.08018	-1.82439	1	1	M	0.105439	0
Abcg4	1.56353	0.331101	0.183672	1	M	0.527195	1.58592
Abcg5	1.11012	-1.33407	1	1	M	0.105439	0.243987
Abcg8	-0.559954	1.9525	0.505261	1	M	4.323	2.92784
Abhd1	-1.06844	-0.689851	0.521739	1	M	0.527195	0.243987
Abhd10	0.3736	4.19872	0.58155	1	M	15.8159	20.4949
Abhd11	-0.232256	5.8265	0.728301	1	M	61.0492	51.9692
Abhd11os	1.11012	-1.33407	1	1	M	0.105439	0.243987
Abhd12	-0.0573621	5.83256	0.937316	1	M	57.886	55.629
Abhd12b	5.12548e-15	-2.14415	1	1	M	0	0
Abhd13	0.191472	3.17417	0.788394	1	M	8.22424	9.3935
Abhd14a	0.0308746	6.86817	0.964172	1	M	115.35	117.846
Abhd14b	-0.0374423	2.62307	1	1	M	6.01002	5.85569
Abhd15	0.198042	-1.14352	1	1	M	0.210878	0.243987
Abhd16a	0.298454	6.54767	0.651325	1	M	83.7186	102.963
Abhd17a	0.138462	6.71408	0.834123	1	M	99.7453	109.794
Abhd17b	0.967434	6.42937	0.14595	1	M	58.2023	113.82
Abhd17c	-0.0724925	4.50811	0.922357	1	M	23.0911	21.9588
Abhd18	0.0347764	3.38825	0.98143	1	M	10.1221	10.3695
Abhd2	-0.0819256	5.12453	0.909375	1	M	35.6384	33.6702
Abhd3	0.145341	3.36789	0.851439	1	M	9.59495	10.6134
Abhd4	0.0311535	7.33725	0.963317	1	M	159.74	163.227
Abhd5	-0.474532	5.91766	0.475236	1	M	70.0115	50.3833
Abhd6	-0.334571	3.3853	0.657496	1	M	11.3874	9.02752
Abhd8	-0.0379252	7.73789	0.954776	1	M	216.045	210.439
Abi1	0.320863	4.28826	0.639497	1	M	17.1866	21.4709
Abi2	1.2544	4.97311	0.0655807	0.772561	M	18.4518	44.0397
Abi3	0.756419	-0.971301	1	1	M	0.210878	0.365981
Abi3bp	1.70912	1.64165	0.0394505	0.564453	M	1.37071	4.51376
Abl1	-0.62589	6.39552	0.344928	1	M	101.854	65.9985
Abl2	-0.411539	5.04177	0.539524	1	M	37.3254	28.0585
Ablim1	0.302895	2.86401	0.693271	1	M	6.32634	7.80759
Ablim2	3.33739	1.35901	0.000999618	0.037628	M	0.421756	4.39177
Ablim3	-0.395976	3.23695	0.587703	1	M	10.4385	7.92958
Abo	-0.745219	1.67445	0.342553	1	M	3.69037	2.19588
Abr	0.902716	4.03352	0.187779	1	M	11.282	21.1049
Abra	3.26724	-1.81972	1	1	M	0	0.121994
Abracl	0.286464	1.2182	0.84754	1	M	1.8979	2.31788
Abraxas1	-0.55425	3.21537	0.447061	1	M	10.7548	7.31961
Abraxas2	0.239939	5.06365	0.727178	1	M	30.4719	35.9881
Abt1	0.0248118	3.65101	0.984531	1	M	12.2309	12.4433
Abtb1	-0.276862	4.82964	0.68796	1	M	30.8936	25.4966
Abtb2	-0.111293	2.77177	0.915986	1	M	6.85354	6.34366
Acaa1a	0.161807	3.37628	0.833976	1	M	9.59495	10.7354
Acaa1b	5.46402	-0.962693	0.0942029	0.931216	M	0	0.609968
Acaa2	0.565199	4.82301	0.402677	1	M	22.6694	33.5482
Acaca	-0.378247	5.74671	0.570186	1	M	60.4166	46.4795
Acacb	-0.666304	2.36373	0.374665	1	M	6.01002	3.7818
Acad10	-0.701936	3.93783	0.306592	1	M	18.6627	11.4674
Acad11	-0.237659	5.22716	0.724785	1	M	40.2777	34.1582
Acad12	-0.261993	1.40575	0.795106	1	M	2.63598	2.19588
Acad8	0.458554	3.68355	0.516624	1	M	10.6493	14.6392
Acad9	0.0682838	3.40475	0.926965	1	M	10.1221	10.6134
Acadl	0.549466	4.27006	0.42609	1	M	15.4995	22.6908
Acadm	0.573807	3.93438	0.410063	1	M	12.1255	18.055
Acads	0.0205339	2.99596	1	1	M	7.69705	7.80759
Acadsb	0.488929	4.65334	0.470632	1	M	20.7715	29.1565
Acadvl	0.0359422	5.27282	0.964153	1	M	37.958	38.9159
Acan	0.937129	0.675199	0.335879	1	M	0.948951	1.8299
Acap1	-0.514856	2.18401	0.499021	1	M	5.06107	3.53781
Acap2	-0.392923	4.45787	0.565764	1	M	24.6727	18.787
Acap3	0.00394066	3.68886	1	1	M	12.6527	12.6873
Acat1	0.410624	5.22077	0.543029	1	M	31.8426	42.3318
Acat2	0.472861	3.60477	0.493811	1	M	10.0167	13.9073
Acat3	-0.506587	1.46141	0.558636	1	M	2.95229	2.07389
Acbd3	0.609078	5.05374	0.361485	1	M	26.1489	39.8919
Acbd4	0.209209	1.44464	0.802807	1	M	2.31966	2.68386
Acbd5	0.678451	4.91736	0.31603	1	M	23.0911	36.964
Acbd6	0.195602	7.38103	0.766625	1	M	155.206	177.745
Acbd7	-0.725021	-1.33855	1	1	M	0.210878	0.121994
Accs	-0.368301	0.100373	0.840166	1	M	0.948951	0.731961
Accsl	3.26724	-1.81972	1	1	M	0	0.121994
Acd	0.0902646	5.0997	0.896442	1	M	33.0024	35.1341
Ace	-1.03355	6.59342	0.120018	1	M	129.374	63.1926
Ace2	0.198042	-1.14352	1	1	M	0.210878	0.243987
Acer1	-3.08018	-1.82439	1	1	M	0.105439	0
Acer2	0.329831	2.50797	0.67782	1	M	4.85019	6.09968
Acer3	0.602765	2.80254	0.405704	1	M	5.37739	8.17357
Acin1	-0.173561	8.09991	0.791695	1	M	290.59	257.65
Ackr1	5.12548e-15	-2.14415	1	1	M	0	0
Ackr2	2.13752	-0.323669	0.137874	1	M	0.210878	0.975948
Ackr3	0.142455	1.41301	0.865284	1	M	2.31966	2.56186
Ackr4	1.11012	-1.33407	1	1	M	0.105439	0.243987
Acly	0.145441	6.19748	0.827893	1	M	69.4843	76.8559
Acmsd	5.12548e-15	-2.14415	1	1	M	0	0
Acnat1	3.0496	-0.428486	0.0577711	0.70846	M	0.105439	0.975948
Acnat2	1.50138	0.0385215	0.23879	1	M	0.421756	1.21994
Aco1	-0.0554231	3.41646	0.945476	1	M	10.6493	10.2475
Aco2	0.0586468	7.64912	0.929652	1	M	196.433	204.583
Acod1	5.12548e-15	-2.14415	1	1	M	0	0
Acot1	0.424591	-0.0530981	0.840166	1	M	0.632634	0.853955
Acot11	1.2643	1.12331	0.147385	1	M	1.15983	2.80585
Acot12	-1.34939	0.165806	0.23879	1	M	1.26527	0.487974
Acot13	0.585684	1.51064	0.526983	1	M	2.10878	3.17183
Acot2	1.44911	0.262392	0.228158	1	M	0.527195	1.46392
Acot3	3.26724	-1.81972	1	1	M	0	0.121994
Acot4	3.26724	-1.81972	1	1	M	0	0.121994
Acot5	5.12548e-15	-2.14415	1	1	M	0	0
Acot6	5.12548e-15	-2.14415	1	1	M	0	0
Acot7	0.183213	9.27969	0.779713	1	M	581.918	660.717
Acot8	0.331243	4.04622	0.63299	1	M	14.4451	18.177
Acot9	-2.11988	2.7048	0.00662651	0.167215	M	10.1221	2.31788
Acox1	0.28729	4.80503	0.670167	1	M	24.989	30.4984
Acox2	-3.08018	-1.82439	1	1	M	0.105439	0
Acox3	-0.0741336	6.43254	0.91258	1	M	88.3579	83.9315
Acoxl	3.26724	-1.81972	1	1	M	0	0.121994
Acp1	0.203469	6.16336	0.76195	1	M	66.4266	76.4899
Acp2	-0.0343211	4.88812	0.966633	1	M	29.7338	29.0345
Acp4	1.68394	3.37692	0.0205362	0.375935	M	4.85019	15.6152
Acp5	0.524966	0.320898	0.612094	1	M	0.843512	1.21994
Acp6	0.0669133	3.03761	0.953251	1	M	7.80249	8.17357
Acp7	-0.859293	0.844212	0.394949	1	M	2.00334	1.09794
Acpp	-0.719508	1.92832	0.388042	1	M	4.42844	2.68386
Acr	-0.118419	7.05436	0.858285	1	M	138.125	127.239
Acrbp	-0.146873	8.48718	0.822988	1	M	376.839	340.362
Acrv1	-1.09915	5.04726	0.104452	0.98098	M	44.7061	20.8609
Acsbg1	0.746974	7.25839	0.257914	1	M	114.19	191.652
Acsf2	0.779242	3.7864	0.257504	1	M	10.0167	17.2011
Acsf3	-0.160341	4.50524	0.819129	1	M	23.7238	21.2269
Acsl3	-0.0591927	5.5138	0.934964	1	M	46.3932	44.5276
Acsl4	-1.26636	3.32964	0.0784069	0.863084	M	13.8125	5.7337
Acsl5	0.324109	3.36516	0.654062	1	M	8.96232	11.2234
Acsl6	0.135161	6.95805	0.838412	1	M	118.303	129.923
Acsm1	5.12548e-15	-2.14415	1	1	M	0	0
Acsm2	-3.08018	-1.82439	1	1	M	0.105439	0
Acsm3	-0.108507	-0.444399	1	1	M	0.527195	0.487974
Acsm4	5.12548e-15	-2.14415	1	1	M	0	0
Acsm5	3.3674	-0.218469	0.0279694	0.456652	M	0.105439	1.21994
Acss1	-0.438248	2.92091	0.564733	1	M	8.43512	6.22167
Acss2	-0.196623	6.27311	0.768988	1	M	82.3479	71.8542
Acss2os	-4.54668	-1.34301	0.285714	1	M	0.316317	0
Acss3	1.87607	0.265853	0.11546	1	M	0.421756	1.58592
Acta1	0.756419	-0.971301	1	1	M	0.210878	0.365981
Acta2	0.0160089	4.67016	0.984507	1	M	25.0945	25.3747
Actb	-0.177127	7.89286	0.78768	1	M	251.999	222.882
Actbl2	5.12548e-15	-2.14415	1	1	M	0	0
Actc1	5.12548e-15	-2.14415	1	1	M	0	0
Actg1	0.144795	10.0519	0.824908	1	M	1008.1	1114.53
Actl11	-1.41452	6.10289	0.0354654	0.52771	M	99.5344	37.33
Actl6a	0.0285267	6.45025	0.965862	1	M	86.3545	88.0793
Actl6b	-1.27945	-1.14789	0.658385	1	M	0.316317	0.121994
Actl7b	0.742034	8.14232	0.259922	1	M	211.3	353.415
Actl9	-0.790921	6.36704	0.23226	1	M	104.279	60.2648
Actn1	0.523833	2.45373	0.48798	1	M	4.323	6.22167
Actn2	0.787245	0.724235	0.426125	1	M	1.05439	1.8299
Actn3	-0.956637	2.40348	0.199722	1	M	6.64266	3.41582
Actn4	-0.0981108	5.04729	0.892594	1	M	33.9514	31.7183
Actr10	0.310326	7.77578	0.636782	1	M	195.484	242.401
Actr1a	-0.00844238	8.32162	0.990339	1	M	320.64	318.769
Actr1b	0.15	5.03585	0.826273	1	M	30.8936	34.2802
Actr2	0.73081	4.70001	0.280123	1	M	19.4008	32.2063
Actr3	0.222108	4.80579	0.743409	1	M	25.6217	29.8884
Actr3b	0.895409	1.11791	0.307713	1	M	1.37071	2.56186
Actr5	-0.213836	4.68168	0.757809	1	M	27.3087	23.5448
Actr6	-0.0852481	4.88366	0.906567	1	M	30.1556	28.4245
Actr8	0.148601	5.87227	0.824943	1	M	55.3555	61.3627
Actrt1	-2.83153	1.48935	0.00349079	0.103073	M	4.42844	0.609968
Acvr1	0.450226	2.51097	0.559974	1	M	4.63932	6.34366
Acvr1b	-0.655535	4.92712	0.334539	1	M	36.9037	23.4228
Acvr1c	0.756419	-0.971301	1	1	M	0.210878	0.365981
Acvr2a	0.441733	4.65508	0.515688	1	M	21.1932	28.7905
Acvr2b	-0.0373979	2.06446	1	1	M	4.00668	3.90379
Acvrl1	1.75091	1.77141	0.0340197	0.520617	M	1.47615	5.00173
Acy1	-0.0239077	1.213	1	1	M	2.10878	2.07389
Acy3	0.502293	2.05687	0.538599	1	M	3.26861	4.63575
Acyp1	0.118145	7.41468	0.858118	1	M	163.43	177.379
Acyp2	0.316822	3.23998	0.661153	1	M	8.22424	10.2475
Ada	0.576075	2.09763	0.477755	1	M	3.26861	4.87974
Adad1	0.685046	7.69322	0.298469	1	M	158.58	254.966
Adad2	-0.306754	6.36669	0.644969	1	M	90.9939	73.5621
Adal	-0.581098	4.06186	0.39678	1	M	19.7171	13.1753
Adam10	0.187126	3.85033	0.798569	1	M	13.2853	15.1272
Adam11	-0.196796	4.2246	0.78222	1	M	19.7171	17.2011
Adam12	0.989343	1.60251	0.254857	1	M	1.8979	3.7818
Adam15	0.244104	3.88025	0.72674	1	M	13.2853	15.7372
Adam17	-0.106509	4.48536	0.877382	1	M	22.9857	21.3489
Adam18	-0.162514	6.95204	0.806065	1	M	130.533	116.626
Adam19	-0.0606687	1.942	0.951983	1	M	3.69037	3.53781
Adam1b	0.00516095	6.73024	0.995583	1	M	105.755	106.134
Adam2	-0.106385	9.04136	0.871175	1	M	546.069	507.249
Adam20	1.54887	5.24941	0.022993	0.40059	M	19.2953	56.483
Adam21	-1.40377	2.75293	0.0562428	0.703864	M	9.38407	3.53781
Adam22	-0.248485	2.73201	0.772975	1	M	6.95897	5.85569
Adam23	1.72213	2.36994	0.0229431	0.400026	M	2.31966	7.68559
Adam24	-0.984992	4.62258	0.145833	1	M	32.3698	16.3471
Adam25	1.77686	4.71691	0.0102709	0.228661	M	11.8092	40.5019
Adam26a	-0.089709	4.22801	0.905772	1	M	19.0845	17.933
Adam26b	0.273767	2.41715	0.755763	1	M	4.63932	5.6117
Adam28	-3.99226	-1.56342	0.52381	1	M	0.210878	0
Adam3	-0.00260938	9.79845	0.997042	1	M	891.065	889.455
Adam30	0.185841	6.33002	0.780068	1	M	75.0726	85.3955
Adam32	0.0558121	9.02764	0.932372	1	M	511.59	531.77
Adam33	-1.06844	-0.689851	0.521739	1	M	0.527195	0.243987
Adam34	0.88625	2.63314	0.227416	1	M	4.21756	7.80759
Adam39	1.77097	4.6199	0.0104274	0.230619	M	11.0711	37.818
Adam5	0.153019	9.94039	0.815155	1	M	930.288	1034.38
Adam6a	-1.38154	3.60574	0.049703	0.656751	M	17.1866	6.58765
Adam6b	-1.49441	2.6665	0.0462892	0.627194	M	8.96232	3.17183
Adam7	5.12548e-15	-2.14415	1	1	M	0	0
Adam8	-0.37298	1.84811	0.697454	1	M	3.7958	2.92784
Adam9	-0.414811	3.92521	0.548804	1	M	17.0811	12.8093
Adamdec1	5.12548e-15	-2.14415	1	1	M	0	0
Adamts1	1.34945	4.13505	0.0509628	0.668219	M	9.80583	25.0087
Adamts10	0.392726	1.5357	0.635966	1	M	2.31966	3.04984
Adamts12	1.03867	0.034884	0.438083	1	M	0.527195	1.09794
Adamts13	5.12548e-15	-2.14415	1	1	M	0	0
Adamts14	-0.583127	-0.241466	0.63315	1	M	0.738073	0.487974
Adamts15	2.59132	-0.038291	0.0536329	0.689314	M	0.210878	1.34193
Adamts16	-0.356382	-0.975593	1	1	M	0.316317	0.243987
Adamts17	0.910028	4.10333	0.184619	1	M	11.8092	22.2028
Adamts18	-1.67897	-0.979877	0.430642	1	M	0.421756	0.121994
Adamts19	-0.448848	0.978472	0.656347	1	M	2.00334	1.46392
Adamts2	1.47314	1.37244	0.0874894	0.910787	M	1.26527	3.53781
Adamts20	-1.09677	0.487619	0.361697	1	M	1.58159	0.731961
Adamts3	0.205273	-0.335381	1	1	M	0.527195	0.609968
Adamts4	0.0398849	0.248573	1	1	M	0.948951	0.975948
Adamts5	2.51645	1.90063	0.00254577	0.080551	M	1.05439	6.09968
Adamts6	0.560577	1.35759	0.542911	1	M	1.8979	2.80585
Adamts7	0.714218	0.255477	0.479207	1	M	0.738073	1.21994
Adamts8	1.15798	-0.817097	0.726708	1	M	0.210878	0.487974
Adamts9	0.3144	0.814439	0.804303	1	M	1.37071	1.70791
Adamtsl1	-0.713973	2.74452	0.328733	1	M	8.01336	4.87974
Adamtsl2	2.65961	0.466274	0.023239	0.402715	M	0.316317	2.07389
Adamtsl3	-0.755904	-0.82551	0.726708	1	M	0.421756	0.243987
Adamtsl4	0.568473	1.03454	0.587191	1	M	1.47615	2.19588
Adamtsl5	-0.544558	1.13265	0.605363	1	M	2.31966	1.58592
Adap1	-0.365117	2.98546	0.624144	1	M	8.646	6.70964
Adap2	0.756419	-0.971301	1	1	M	0.210878	0.365981
Adar	0.272761	3.41847	0.716257	1	M	9.48951	11.4674
Adarb1	0.363535	3.45155	0.623865	1	M	9.38407	12.0774
Adarb2	0.756419	-0.971301	1	1	M	0.210878	0.365981
Adat1	-0.533374	3.55442	0.451611	1	M	13.6016	9.3935
Adat2	-0.45363	2.14939	0.558578	1	M	4.85019	3.53781
Adat3	1.14583	3.99389	0.0972206	0.945023	M	9.80583	21.7148
Adck1	0.259755	4.06864	0.714038	1	M	15.0778	18.055
Adck2	0.0347764	3.38825	0.98143	1	M	10.1221	10.3695
Adck5	0.151772	4.08948	0.828409	1	M	15.9213	17.6891
Adcy1	-0.769218	2.7432	0.293234	1	M	8.1188	4.75775
Adcy3	0.369575	2.11216	0.66739	1	M	3.58493	4.63575
Adcy4	0.198042	-1.14352	1	1	M	0.210878	0.243987
Adcy5	0.79083	1.48507	0.373174	1	M	1.8979	3.29383
Adcy6	-0.0839622	3.76016	0.913786	1	M	13.7071	12.9313
Adcy7	0.848505	1.96148	0.277562	1	M	2.63598	4.75775
Adcy8	-3.08018	-1.82439	1	1	M	0.105439	0
Adcy9	-0.0601433	3.01406	0.952622	1	M	8.01336	7.68559
Adcyap1	5.12548e-15	-2.14415	1	1	M	0	0
Adcyap1r1	3.18199	1.76304	0.000335144	0.0156144	M	0.632634	5.85569
Add1	-0.386972	5.24152	0.561867	1	M	42.5974	32.5723
Add2	-0.109999	0.314107	1	1	M	1.05439	0.975948
Add3	-0.206464	6.68064	0.75514	1	M	109.657	95.033
Adgb	1.60739	6.17965	0.0174952	0.33652	M	35.7438	108.94
Adgra1	0.187059	-1.55886	1	1	M	0.105439	0.121994
Adgra2	0.424591	-0.0530981	0.840166	1	M	0.632634	0.853955
Adgra3	-0.680401	3.62377	0.335553	1	M	14.8669	9.27151
Adgrb1	0.208537	0.858826	0.904233	1	M	1.47615	1.70791
Adgrb2	0.307283	0.904727	0.814851	1	M	1.47615	1.8299
Adgrb3	-0.0781316	0.439914	1	1	M	1.15983	1.09794
Adgrd1	1.51978	1.16464	0.0817032	0.885839	M	1.05439	3.04984
Adgre1	1.59722	1.34148	0.064661	0.764102	M	1.15983	3.53781
Adgre4	5.12548e-15	-2.14415	1	1	M	0	0
Adgre5	-0.461557	2.48838	0.552389	1	M	6.2209	4.51376
Adgrf1	3.26724	-1.81972	1	1	M	0	0.121994
Adgrf2	5.12548e-15	-2.14415	1	1	M	0	0
Adgrf3	1.29293	3.78864	0.066029	0.775431	M	7.90793	19.397
Adgrf4	3.26724	-1.81972	1	1	M	0	0.121994
Adgrf5	-0.327092	0.805544	0.804303	1	M	1.68702	1.34193
Adgrg1	0.168875	4.58252	0.804644	1	M	22.3531	25.1307
Adgrg2	-1.27945	-1.14789	0.658385	1	M	0.316317	0.121994
Adgrg3	0.198042	-1.14352	1	1	M	0.210878	0.243987
Adgrg5	3.26724	-1.81972	1	1	M	0	0.121994
Adgrg6	0.187059	-1.55886	1	1	M	0.105439	0.121994
Adgrg7	1.5446	1.527	0.070754	0.810818	M	1.37071	4.02579
Adgrl1	-0.737484	5.46058	0.268134	1	M	54.7228	32.8163
Adgrl2	0.152585	4.51907	0.829682	1	M	21.5096	23.9107
Adgrl3	-0.0809307	3.11096	0.933033	1	M	8.646	8.17357
Adgrl4	2.07006	-0.967001	0.430642	1	M	0.105439	0.487974
Adgrv1	0.773715	4.31515	0.257509	1	M	14.5506	24.8867
Adh1	1.13429	3.10582	0.11158	1	M	5.27195	11.5894
Adh4	-0.132313	3.42182	0.855975	1	M	10.9657	10.0035
Adh5	0.396269	4.36454	0.563812	1	M	17.6083	23.1788
Adh6-ps1	5.12548e-15	-2.14415	1	1	M	0	0
Adh6a	5.12548e-15	-2.14415	1	1	M	0	0
Adh7	1.12065	2.18476	0.141201	1	M	2.74141	5.97768
Adhfe1	0.985271	2.50932	0.184481	1	M	3.69037	7.31961
Adi1	1.30898	1.94903	0.0915427	0.931216	M	2.10878	5.24572
Adipoq	2.10497	1.82522	0.011446	0.247205	M	1.26527	5.48971
Adipor1	0.542461	6.32611	0.411405	1	M	65.1613	94.911
Adipor2	0.459108	4.81367	0.49547	1	M	23.5129	32.3283
Adk	-0.515126	3.07054	0.469491	1	M	9.59495	6.70964
Adm	1.75073	-0.131221	0.189984	1	M	0.316317	1.09794
Adm2	5.12548e-15	-2.14415	1	1	M	0	0
Adnp	-0.0117701	-0.0567904	1	1	M	0.738073	0.731961
Adnp2	0.88075	4.52083	0.195003	1	M	16.0267	29.5224
Ado	0.510414	5.10672	0.446646	1	M	28.2577	40.2579
Adora1	-2.47344	4.65233	0.000544982	0.0229458	M	42.0702	7.5636
Adora2a	1.11012	-1.33407	1	1	M	0.105439	0.243987
Adora2b	0.917334	-0.553965	0.769726	1	M	0.316317	0.609968
Adora3	-5.25875	-0.984153	0.0942029	0.931216	M	0.527195	0
Adpgk	-0.288652	3.01784	0.69686	1	M	8.646	7.07562
Adprh	-0.0801792	6.2507	0.906157	1	M	78.0249	73.8061
Adprhl1	-3.08018	-1.82439	1	1	M	0.105439	0
Adprhl2	-0.0694314	1.89876	0.950626	1	M	3.58493	3.41582
Adprm	-0.0927746	2.62165	0.938547	1	M	6.11546	5.7337
Adra1a	0.187059	-1.55886	1	1	M	0.105439	0.121994
Adra1b	5.12548e-15	-2.14415	1	1	M	0	0
Adra1d	-2.65538	-0.456274	0.084472	0.892867	M	0.843512	0.121994
Adra2a	1.6685	-1.13913	0.658385	1	M	0.105439	0.365981
Adra2b	0.756419	-0.971301	1	1	M	0.210878	0.365981
Adra2c	3.26724	-1.81972	1	1	M	0	0.121994
Adrb1	0.00391015	0.855902	1	1	M	1.58159	1.58592
Adrb2	4.74868	-1.32959	0.285714	1	M	0	0.365981
Adrb3	5.12548e-15	-2.14415	1	1	M	0	0
Adrm1	0.0450506	6.39757	0.948106	1	M	82.7696	85.3955
Adsl	-0.414728	5.7058	0.536353	1	M	59.3622	44.5276
Adss	0.0447652	6.75301	0.947478	1	M	105.966	109.306
Adssl1	1.89144	1.77352	0.0224924	0.393678	M	1.37071	5.12373
Aebp1	0.661713	3.87057	0.334173	1	M	11.1765	17.6891
Aebp2	-0.0299311	5.35865	0.966215	1	M	41.2267	40.3799
Aen	-0.0958198	3.58089	0.902688	1	M	12.1255	11.3454
Aes	0.152626	5.32051	0.82292	1	M	37.6417	41.8438
AF067061	-3.08018	-1.82439	1	1	M	0.105439	0
AF067063	0.198042	-1.14352	1	1	M	0.210878	0.243987
AF357355	5.12548e-15	-2.14415	1	1	M	0	0
AF357359	5.12548e-15	-2.14415	1	1	M	0	0
AF357399	3.26724	-1.81972	1	1	M	0	0.121994
AF357425	5.12548e-15	-2.14415	1	1	M	0	0
AF357426	5.12548e-15	-2.14415	1	1	M	0	0
AF366264	-1.47581	2.89659	0.0429737	0.593591	M	10.5439	3.7818
AF529169	-3.08018	-1.82439	1	1	M	0.105439	0
Afap1	-1.009	4.17841	0.140985	1	M	23.8292	11.8334
Afap1l1	0.0515567	2.42697	1	1	M	5.06107	5.24572
Afap1l2	0.142455	1.41301	0.865284	1	M	2.31966	2.56186
Afdn	-0.745709	6.21086	0.261434	1	M	92.47	55.1411
Aff1	0.393771	2.48035	0.610979	1	M	4.63932	6.09968
Aff2	1.90201	2.06415	0.0182551	0.347966	M	1.68702	6.34366
Aff3	-0.784934	1.45668	0.354733	1	M	3.16317	1.8299
Aff4	0.369743	6.44446	0.574938	1	M	75.8106	97.9608
Afg1l	0.623549	2.33016	0.395739	1	M	3.7958	5.85569
Afg3l1	-0.563689	4.53814	0.409428	1	M	27.4141	18.543
Afg3l2	-0.0761609	6.07718	0.911844	1	M	69.0626	65.5105
Afm	-0.594942	2.18227	0.434448	1	M	5.16651	3.41582
Afmid	-1.10263	1.12465	0.248713	1	M	2.63598	1.21994
Afp	3.0496	-0.428486	0.0577711	0.70846	M	0.105439	0.975948
Aftph	0.174853	6.90921	0.791587	1	M	112.714	127.239
Aga	-0.540303	2.57033	0.469114	1	M	6.7481	4.63575
Agap1	-0.0914919	3.23693	0.918522	1	M	9.48951	8.90553
Agap2	1.51154	0.51677	0.119582	1	M	0.632634	1.8299
Agap3	0.0136322	4.74504	0.985284	1	M	26.4652	26.7166
Agbl1	-1.54306	-0.452321	0.266667	1	M	0.738073	0.243987
Agbl2	-0.22358	7.90819	0.733713	1	M	258.536	221.418
Agbl3	0.291167	6.11638	0.660277	1	M	62.209	76.124
Agbl4	0.182819	5.90116	0.786316	1	M	55.7772	63.3146
Agbl5	0.13985	9.69954	0.830874	1	M	791.003	871.522
Ager	1.11012	-1.33407	1	1	M	0.105439	0.243987
Agfg1	0.246742	7.30608	0.708	1	M	144.557	171.523
Agfg2	-0.878572	3.4603	0.214879	1	M	13.9179	7.5636
Aggf1	0.444927	5.30984	0.508857	1	M	33.4242	45.5036
Agk	-0.154071	4.38224	0.822294	1	M	21.7204	19.519
Agl	-0.234426	4.00333	0.736194	1	M	17.0811	14.5172
Agmat	4.1903	-1.55428	0.52381	1	M	0	0.243987
Agmo	0.207519	0.317501	0.866239	1	M	0.948951	1.09794
Ago1	0.00789051	3.18699	1	1	M	8.85688	8.90553
Ago2	-0.904463	4.48216	0.186363	1	M	28.7848	15.3712
Ago3	-0.0148722	3.15921	1	1	M	8.75144	8.66154
Ago4	-0.432172	5.81826	0.517184	1	M	64.5287	47.8215
Agpat1	0.18957	8.14867	0.772875	1	M	264.968	302.178
Agpat2	-2.8334	3.43034	0.000219336	0.0108882	M	18.3464	2.56186
Agpat3	-0.0202328	7.88406	0.976208	1	M	237.66	234.35
Agpat4	-1.9355	3.284	0.00894916	0.209329	M	14.9723	3.90379
Agpat5	-0.148837	2.81767	0.864681	1	M	7.16985	6.46566
Agps	0.368867	2.89927	0.629284	1	M	6.32634	8.17357
Agr2	5.12548e-15	-2.14415	1	1	M	0	0
Agr3	-0.413849	0.850055	0.717697	1	M	1.79246	1.34193
Agrn	-0.319657	3.33848	0.646989	1	M	10.9657	8.78353
Agrp	3.26724	-1.81972	1	1	M	0	0.121994
Agt	1.59944	8.01416	0.0171237	0.331904	M	128.214	388.549
Agtpbp1	0.0661711	7.59293	0.920578	1	M	188.42	197.264
Agtr1a	-0.111384	3.44502	0.875731	1	M	11.0711	10.2475
Agtr1b	0.0720361	0.500558	1	1	M	1.15983	1.21994
Agtr2	-3.99226	-1.56342	0.52381	1	M	0.210878	0
Agtrap	-0.0769234	5.26049	0.912314	1	M	39.1179	37.086
Agxt	5.12548e-15	-2.14415	1	1	M	0	0
Agxt2	3.26724	-1.81972	1	1	M	0	0.121994
Ahctf1	0.00898722	8.2509	0.989692	1	M	303.453	305.35
Ahcy	0.0723529	4.95632	0.917432	1	M	30.0501	31.5963
Ahcyl1	0.330388	6.3901	0.618524	1	M	74.1236	93.2031
Ahcyl2	0.0779345	6.6301	0.907718	1	M	96.1604	101.499
Ahdc1	-0.191843	6.9796	0.771654	1	M	134.329	117.602
Ahi1	-0.056256	7.85347	0.93242	1	M	235.551	226.542
Ahnak	1.3228	4.35608	0.0541947	0.695356	M	11.5983	29.0345
Ahr	3.62768	-0.0345798	0.0141459	0.287675	M	0.105439	1.46392
Ahrr	0.187059	-1.55886	1	1	M	0.105439	0.121994
Ahsa1	0.295503	6.12362	0.656615	1	M	62.4199	76.6119
Ahsa2	-0.276322	4.22642	0.682881	1	M	20.2443	16.7131
Ahsg	0.187059	-1.55886	1	1	M	0.105439	0.121994
AI115009	5.12548e-15	-2.14415	1	1	M	0	0
AI182371	-1.06942	0.970055	0.25882	1	M	2.31966	1.09794
AI197445	-3.08018	-1.82439	1	1	M	0.105439	0
AI314180	-0.203934	6.15477	0.760483	1	M	76.0215	65.9985
AI314278	5.12548e-15	-2.14415	1	1	M	0	0
AI413582	-0.22308	2.95829	0.756587	1	M	8.1188	6.95363
AI427809	-0.197527	-0.685733	1	1	M	0.421756	0.365981
AI429214	0.470914	5.67304	0.480347	1	M	42.5974	59.0449
AI450353	-3.99226	-1.56342	0.52381	1	M	0.210878	0
AI463170	5.12548e-15	-2.14415	1	1	M	0	0
AI464131	-0.077138	4.68934	0.915857	1	M	26.2543	24.8867
AI467606	-0.321312	3.1955	0.670933	1	M	9.91127	7.92958
AI504432	7.11944	0.207973	0.000726851	0.0288657	M	0	1.9519
AI506816	4.1903	-1.55428	0.52381	1	M	0	0.243987
AI593442	-3.99226	-1.56342	0.52381	1	M	0.210878	0
AI597479	0.0997428	4.89812	0.887718	1	M	28.574	30.6204
AI606473	5.12548e-15	-2.14415	1	1	M	0	0
AI646519	-3.08018	-1.82439	1	1	M	0.105439	0
AI661453	-0.984686	-0.343164	0.442579	1	M	0.738073	0.365981
AI662270	1.6685	-1.13913	0.658385	1	M	0.105439	0.365981
AI837181	0.599647	5.38212	0.37017	1	M	33.0024	50.0173
AI839979	5.12548e-15	-2.14415	1	1	M	0	0
AI846148	0.544766	4.88247	0.421124	1	M	23.8292	34.7682
AI847159	5.12548e-15	-2.14415	1	1	M	0	0
AI854703	-0.778034	0.307326	0.612094	1	M	1.26527	0.731961
AI987944	0.204586	5.8374	0.760387	1	M	52.9304	60.9968
Aicda	-3.08018	-1.82439	1	1	M	0.105439	0
Aida	-0.116994	5.32758	0.867299	1	M	41.543	38.306
Aif1l	0.374799	0.252024	0.725047	1	M	0.843512	1.09794
Aifm1	0.422162	2.99676	0.586377	1	M	6.64266	8.90553
Aifm2	0.14931	5.24033	0.828176	1	M	35.6384	39.5259
Aifm3	-0.0178144	2.17736	1	1	M	4.323	4.26977
Aig1	1.87607	0.265853	0.11546	1	M	0.421756	1.58592
Aim2	2.38384	-0.81288	0.282609	1	M	0.105439	0.609968
Aimp1	0.194079	5.92333	0.770469	1	M	56.4099	64.5346
Aimp2	0.177313	3.92208	0.808685	1	M	14.0234	15.8592
Aip	0.534459	3.8089	0.438553	1	M	11.282	16.3471
Aipl1	-0.911528	0.169305	0.438083	1	M	1.15983	0.609968
Aire	-1.27945	-1.14789	0.658385	1	M	0.316317	0.121994
Airn	5.12548e-15	-2.14415	1	1	M	0	0
Ajap1	3.26724	-1.81972	1	1	M	0	0.121994
Ajuba	-1.1013	2.88319	0.131392	1	M	9.70039	4.51376
Ak1	0.337231	5.96568	0.611497	1	M	55.0392	69.5363
Ak2	-0.115349	7.16688	0.861803	1	M	149.196	137.731
Ak3	0.400304	4.20404	0.555194	1	M	15.7104	20.7389
Ak4	0.594354	2.74177	0.407034	1	M	5.16651	7.80759
Ak5	0.148601	2.47425	0.89815	1	M	5.06107	5.6117
Ak6	0.424127	3.96716	0.539116	1	M	13.1799	17.6891
Ak7	-0.225681	7.19432	0.732203	1	M	157.631	134.803
Ak8	0.600378	7.4892	0.362045	1	M	142.659	216.295
Akain1	5.12548e-15	-2.14415	1	1	M	0	0
Akap10	-0.475213	5.47815	0.475901	1	M	51.5597	37.086
Akap11	0.095107	5.97031	0.889409	1	M	60.4166	64.5346
Akap12	-0.422436	9.77005	0.519082	1	M	999.773	745.99
Akap13	0.194496	4.39356	0.778292	1	M	19.4008	22.2028
Akap14	2.54524	3.54814	0.000657743	0.0267044	M	3.37405	19.763
Akap17b	-0.827107	2.66813	0.268476	1	M	7.80249	4.39177
Akap2	5.12548e-15	-2.14415	1	1	M	0	0
Akap3	-2.21843	7.13666	0.00124162	0.0450232	M	231.122	49.6514
Akap5	-0.051467	-0.237645	1	1	M	0.632634	0.609968
Akap6	0.45895	2.2761	0.556217	1	M	3.90124	5.36772
Akap7	0.397878	3.30198	0.57035	1	M	8.32968	10.9794
Akap8	-0.442738	6.6621	0.503064	1	M	116.405	85.6395
Akap8l	0.0401715	6.0557	0.952202	1	M	65.3722	67.2184
Akap9	0.606815	5.48395	0.363002	1	M	35.3221	53.7991
Akip1	2.05717	5.03601	0.00304405	0.0917862	M	12.6527	52.7012
Akirin1	0.2924	5.65226	0.662601	1	M	45.0225	55.1411
Akirin2	0.287673	6.51799	0.664285	1	M	82.3479	100.523
Akna	1.10436	5.44913	0.0994296	0.954401	M	27.625	59.4108
Akp3	0.396416	0.107505	0.700311	1	M	0.738073	0.975948
Akr1a1	-0.102499	6.19654	0.878451	1	M	75.7052	70.5123
Akr1b10	1.00177	1.68269	0.247778	1	M	2.00334	4.02579
Akr1b3	5.12548e-15	-2.14415	1	1	M	0	0
Akr1b7	0.603554	-0.681609	1	1	M	0.316317	0.487974
Akr1b8	-0.662121	4.72315	0.329141	1	M	32.0535	20.2509
Akr1c12	-5.73337	-0.698067	0.0347826	0.520617	M	0.738073	0
Akr1c13	-1.40545	1.55946	0.0920471	0.931216	M	3.90124	1.46392
Akr1c14	0.207519	0.317501	0.866239	1	M	0.948951	1.09794
Akr1c18	5.12548e-15	-2.14415	1	1	M	0	0
Akr1c19	1.47176	-0.677478	0.521739	1	M	0.210878	0.609968
Akr1c20	5.12548e-15	-2.14415	1	1	M	0	0
Akr1c21	5.12548e-15	-2.14415	1	1	M	0	0
Akr1c6	5.12548e-15	-2.14415	1	1	M	0	0
Akr1cl	1.15526	7.02036	0.082399	0.889142	M	80.3445	178.965
Akr1d1	5.12548e-15	-2.14415	1	1	M	0	0
Akr1e1	0.260261	5.42514	0.69794	1	M	38.907	46.6015
Akr7a5	-0.0453023	4.37008	0.952389	1	M	20.7715	20.1289
Akt1	0.441732	4.81016	0.511761	1	M	23.6183	32.0843
Akt1s1	-0.119689	4.75274	0.868652	1	M	27.8359	25.6186
Akt2	-0.0893841	6.61173	0.894424	1	M	100.589	94.545
Akt3	0.402849	4.91649	0.553354	1	M	25.8326	34.1582
Aktip	-0.499727	4.29942	0.464805	1	M	22.7748	16.1031
Alad	-0.270532	4.29426	0.696629	1	M	21.1932	17.5671
Alas1	-0.245726	7.00257	0.709704	1	M	138.863	117.114
Alb	5.12548e-15	-2.14415	1	1	M	0	0
Alcam	0.659179	1.48271	0.467814	1	M	2.00334	3.17183
Aldh16a1	0.455842	3.84147	0.514389	1	M	11.9146	16.3471
Aldh18a1	0.0268965	2.87894	1	1	M	7.06441	7.19762
Aldh1a1	1.03787	7.39284	0.117486	1	M	109.973	225.81
Aldh1a2	0.0610536	7.08805	0.927296	1	M	132.959	138.707
Aldh1a3	-0.11076	1.17596	0.92171	1	M	2.10878	1.9519
Aldh1a7	1.13907	3.66402	0.104626	0.98098	M	7.80249	17.2011
Aldh1b1	-0.0620602	3.68051	0.954414	1	M	12.8636	12.3213
Aldh1l1	0.983766	4.92978	0.144236	1	M	20.3497	40.2579
Aldh1l2	2.38384	-0.81288	0.282609	1	M	0.105439	0.609968
Aldh2	0.550259	6.63601	0.404844	1	M	80.5554	117.968
Aldh3a1	0.29562	1.06995	0.832809	1	M	1.68702	2.07389
Aldh3a2	0.11813	4.54273	0.865347	1	M	22.1422	24.0327
Aldh3b1	2.05633	5.34625	0.00293247	0.0896136	M	15.7104	65.3885
Aldh3b2	1.23683	4.81431	0.0698382	0.805649	M	16.6594	39.2819
Aldh3b3	0.207519	0.317501	0.866239	1	M	0.948951	1.09794
Aldh4a1	0.704698	3.11388	0.338327	1	M	6.43178	10.4914
Aldh5a1	-0.318281	1.43507	0.734082	1	M	2.74141	2.19588
Aldh6a1	0.535677	4.32843	0.429769	1	M	16.2376	23.5448
Aldh7a1	-0.221824	5.0505	0.747177	1	M	35.4275	30.3764
Aldh8a1	0.592416	0.952107	0.567307	1	M	1.37071	2.07389
Aldh9a1	-0.0254639	6.36966	0.97114	1	M	83.1914	81.7357
Aldoa	0.320746	7.52066	0.625832	1	M	163.114	203.729
Aldoart1	1.59369	5.73693	0.0187974	0.356445	M	26.4652	79.9058
Aldoart2	0.412337	6.73467	0.532391	1	M	91.2047	121.384
Aldob	0.187059	-1.55886	1	1	M	0.105439	0.121994
Aldoc	0.504555	2.54097	0.51274	1	M	4.63932	6.58765
Alg1	-0.246685	3.19759	0.731701	1	M	9.70039	8.17357
Alg10b	-0.00300266	3.11315	1	1	M	8.43512	8.41755
Alg11	-0.0392887	3.99416	0.975432	1	M	15.9213	15.4932
Alg12	-0.143834	3.37521	0.851439	1	M	10.6493	9.63749
Alg13	1.11908	4.71515	0.100168	0.954897	M	16.4485	35.7441
Alg14	1.63032	1.23899	0.0611377	0.738245	M	1.05439	3.29383
Alg2	-0.0423187	3.56882	0.967194	1	M	11.8092	11.4674
Alg3	0.244916	3.84643	0.720667	1	M	12.969	15.3712
Alg5	0.4132	3.05717	0.561206	1	M	6.95897	9.27151
Alg6	-0.281547	1.95831	0.763086	1	M	4.00668	3.29383
Alg8	0.124864	5.33789	0.853716	1	M	38.4852	41.9658
Alg9	0.393227	5.44301	0.558275	1	M	37.4308	49.1634
Alk	-1.57854	0.790736	0.124578	1	M	2.21422	0.731961
Alkal1	5.12548e-15	-2.14415	1	1	M	0	0
Alkal2	5.12548e-15	-2.14415	1	1	M	0	0
Alkbh1	-0.745211	4.27554	0.277538	1	M	23.9347	14.2732
Alkbh2	-0.14982	0.17631	1	1	M	0.948951	0.853955
Alkbh3	-0.047385	5.32793	0.945743	1	M	40.594	39.2819
Alkbh3os1	-0.859774	2.39036	0.249307	1	M	6.43178	3.53781
Alkbh4	0.0763923	4.47306	0.920411	1	M	21.4041	22.5688
Alkbh5	-0.0358534	6.19443	0.959292	1	M	73.9127	72.0982
Alkbh6	-0.292912	3.22257	0.695707	1	M	10.0167	8.17357
Alkbh7	0.280572	4.2399	0.68643	1	M	16.8702	20.4949
Alkbh8	0.0526158	1.73956	1	1	M	3.05773	3.17183
Alms1	0.186362	7.02175	0.777928	1	M	121.36	138.097
Alms1-ps2	3.26724	-1.81972	1	1	M	0	0.121994
Alox12	-2.46739	1.43534	0.00943598	0.215398	M	4.11212	0.731961
Alox12b	2.38159	0.269317	0.0493358	0.655964	M	0.316317	1.70791
Alox12e	-3.08018	-1.82439	1	1	M	0.105439	0
Alox15	0.78193	0.111075	0.580436	1	M	0.632634	1.09794
Alox5	-1.27945	-1.14789	0.658385	1	M	0.316317	0.121994
Alox5ap	2.07006	-0.967001	0.430642	1	M	0.105439	0.487974
Alox8	5.12548e-15	-2.14415	1	1	M	0	0
Aloxe3	0.343803	0.503797	0.763627	1	M	1.05439	1.34193
Alpi	4.74868	-1.32959	0.285714	1	M	0	0.365981
Alpk1	-0.829436	1.56854	0.308509	1	M	3.47949	1.9519
Alpk2	1.69081	0.630667	0.078524	0.863084	M	0.632634	2.07389
Alpk3	-1.17394	-0.245283	0.442579	1	M	0.843512	0.365981
Alppl2	-0.370782	0.708977	0.792443	1	M	1.58159	1.21994
Als2	-0.0665839	5.10625	0.92548	1	M	35.0058	33.4262
Als2cl	-0.381349	3.22876	0.60361	1	M	10.333	7.92958
Als2cr11	0.313898	7.57707	0.633155	1	M	170.073	211.415
Als2cr12	0.30569	7.26501	0.642538	1	M	137.387	169.815
Alx1	0.251647	5.3198	0.70884	1	M	36.271	43.1857
Alx3	5.15024	-1.13474	0.161491	1	M	0	0.487974
Alx4	4.1903	-1.55428	0.52381	1	M	0	0.243987
Alyref	0.0594282	5.03278	0.933686	1	M	31.8426	33.1822
Alyref2	-0.273587	1.55113	0.816583	1	M	2.95229	2.43987
Amacr	0.934201	2.21707	0.221791	1	M	3.05773	5.85569
Ambn	4.1903	-1.55428	0.52381	1	M	0	0.243987
Ambp	0.187059	-1.55886	1	1	M	0.105439	0.121994
Ambra1	-0.117572	6.99185	0.859391	1	M	132.221	121.872
Amd1	5.12548e-15	-2.14415	1	1	M	0	0
Amd2	5.12548e-15	-2.14415	1	1	M	0	0
Amdhd1	5.12548e-15	-2.14415	1	1	M	0	0
Amdhd2	0.321901	6.60874	0.625977	1	M	86.5654	108.208
Amelx	5.12548e-15	-2.14415	1	1	M	0	0
Amer1	0.0495873	1.17859	1	1	M	2.00334	2.07389
Amer2	1.42098	5.03301	0.03701	0.544828	M	17.7138	47.4555
Amer3	-1.62687	0.013132	0.189984	1	M	1.15983	0.365981
Amfr	-0.388162	6.89269	0.556353	1	M	134.435	102.719
Amh	0.207803	0.443202	0.876186	1	M	1.05439	1.21994
Amhr2	-1.49835	6.39768	0.0260136	0.434247	M	124.102	43.9177
Amigo1	0.357687	0.383389	0.745855	1	M	0.948951	1.21994
Amigo2	0.286464	1.2182	0.84754	1	M	1.8979	2.31788
Amigo3	0.524966	0.320898	0.612094	1	M	0.843512	1.21994
Ammecr1	0.38793	1.03177	0.745262	1	M	1.58159	2.07389
Ammecr1l	0.00812815	7.91345	0.990914	1	M	240.19	241.547
Amn	-2.08619	0.917984	0.0287437	0.464694	M	2.63598	0.609968
Amn1	0.0445605	5.93955	0.948256	1	M	60.2057	62.0947
Amot	-1.39324	2.23553	0.077138	0.856352	M	6.43178	2.43987
Amotl1	0.526106	5.43612	0.43105	1	M	35.3221	50.8713
Amotl2	0.47235	2.70104	0.52802	1	M	5.27195	7.31961
Ampd1	-0.755904	-0.82551	0.726708	1	M	0.421756	0.243987
Ampd2	0.538931	3.36337	0.445753	1	M	8.22424	11.9554
Ampd3	-0.201021	0.0239923	1	1	M	0.843512	0.731961
Amt	-0.691337	2.37871	0.354665	1	M	6.11546	3.7818
Amtn	5.12548e-15	-2.14415	1	1	M	0	0
Amy1	0.24816	4.13054	0.714851	1	M	15.8159	18.787
Amy2a3	5.12548e-15	-2.14415	1	1	M	0	0
Amy2a4	5.12548e-15	-2.14415	1	1	M	0	0
Amy2a5	5.12548e-15	-2.14415	1	1	M	0	0
Amy2b	5.12548e-15	-2.14415	1	1	M	0	0
Amz1	0.517812	-0.440429	1	1	M	0.421756	0.609968
Amz2	0.0874584	8.10039	0.894444	1	M	265.917	282.537
Anapc1	-0.287551	6.3585	0.665247	1	M	89.9395	73.6841
Anapc10	0.884427	4.56035	0.192888	1	M	16.4485	30.3764
Anapc11	0.236177	5.8428	0.724841	1	M	52.5086	61.8507
Anapc13	0.242948	4.92472	0.725582	1	M	27.625	32.6943
Anapc15	0.0995087	5.09524	0.88463	1	M	32.7915	35.1341
Anapc16	-0.0867124	4.57751	0.901175	1	M	24.3564	22.9348
Anapc2	0.19478	5.72526	0.770322	1	M	49.1346	56.239
Anapc4	-0.0375182	5.31399	0.960137	1	M	40.0668	39.0379
Anapc5	-0.104164	6.40772	0.878515	1	M	87.7253	81.6137
Anapc7	0.158684	4.84701	0.81638	1	M	26.9924	30.1324
Ang	5.15024	-1.13474	0.161491	1	M	0	0.487974
Ang2	5.12548e-15	-2.14415	1	1	M	0	0
Ang3	5.12548e-15	-2.14415	1	1	M	0	0
Ang4	-3.08018	-1.82439	1	1	M	0.105439	0
Ang5	5.12548e-15	-2.14415	1	1	M	0	0
Ang6	5.12548e-15	-2.14415	1	1	M	0	0
Angel1	-0.451349	8.00722	0.492114	1	M	296.916	217.148
Angel2	-0.0084162	5.99382	0.990644	1	M	63.6852	63.3146
Angpt1	3.26724	-1.81972	1	1	M	0	0.121994
Angpt2	0.756419	-0.971301	1	1	M	0.210878	0.365981
Angpt4	1.11012	-1.33407	1	1	M	0.105439	0.243987
Angptl1	1.9009	-0.0419985	0.143889	1	M	0.316317	1.21994
Angptl2	0.871036	-0.0494021	0.542974	1	M	0.527195	0.975948
Angptl3	0.187059	-1.55886	1	1	M	0.105439	0.121994
Angptl4	1.51672	4.37355	0.0285606	0.463162	M	10.6493	30.4984
Angptl6	1.76828	0.459673	0.119582	1	M	0.527195	1.8299
Angptl7	-3.08018	-1.82439	1	1	M	0.105439	0
Angptl8	3.26724	-1.81972	1	1	M	0	0.121994
Ank	-0.523744	1.54654	0.526983	1	M	3.16317	2.19588
Ank1	-1.89959	-0.249095	0.191276	1	M	0.948951	0.243987
Ank3	0.351137	3.06532	0.624094	1	M	7.16985	9.14951
Ankar	-0.239048	7.25778	0.716845	1	M	165.434	140.171
Ankdd1b	0.775388	-0.331482	0.7999	1	M	0.421756	0.731961
Ankef1	0.380678	7.2132	0.563279	1	M	128.741	167.619
Ankfn1	0.46285	-0.233819	1	1	M	0.527195	0.731961
Ankfy1	-0.494376	5.01932	0.464768	1	M	37.6417	26.7166
Ankhd1	-0.0445566	6.35113	0.948854	1	M	82.6642	80.1497
Ankib1	-0.156989	5.55261	0.815397	1	M	49.24	44.1617
Ankk1	0.603554	-0.681609	1	1	M	0.316317	0.487974
Ankle1	0.617963	0.507038	0.545915	1	M	0.948951	1.46392
Ankle2	-0.30413	6.52111	0.645297	1	M	101.221	81.9797
Ankmy1	0.403263	6.20542	0.543651	1	M	63.3688	83.8096
Ankmy2	-0.0522421	1.06448	1	1	M	1.8979	1.8299
Ankra2	-0.00314661	4.98244	1	1	M	31.4208	31.3523
Ankrd1	5.12548e-15	-2.14415	1	1	M	0	0
Ankrd10	-0.295196	6.46386	0.656274	1	M	97.0039	79.0518
Ankrd11	-0.518732	6.55972	0.432935	1	M	110.816	77.3439
Ankrd12	0.16386	5.52507	0.807874	1	M	43.23	48.4314
Ankrd13a	0.206173	8.45319	0.753342	1	M	325.279	375.252
Ankrd13b	0.0839539	0.611792	1	1	M	1.26527	1.34193
Ankrd13c	0.709803	5.09155	0.291976	1	M	25.7271	42.0878
Ankrd13d	1.05173	1.39784	0.226004	1	M	1.58159	3.29383
Ankrd16	-0.623203	3.25622	0.385497	1	M	11.282	7.31961
Ankrd17	-0.0553713	6.25691	0.934999	1	M	77.7085	74.782
Ankrd2	-1.99151	-0.829706	0.282609	1	M	0.527195	0.121994
Ankrd22	0.78193	0.111075	0.580436	1	M	0.632634	1.09794
Ankrd23	-0.218222	3.80335	0.765311	1	M	14.7615	12.6873
Ankrd24	-0.495849	3.70517	0.485562	1	M	14.9723	10.6134
Ankrd26	0.53762	2.52753	0.48232	1	M	4.53388	6.58765
Ankrd27	-0.581058	5.02397	0.388326	1	M	38.6961	25.8626
Ankrd28	0.347083	5.48436	0.604576	1	M	39.2233	49.8954
Ankrd29	1.11012	-1.33407	1	1	M	0.105439	0.243987
Ankrd33	5.12548e-15	-2.14415	1	1	M	0	0
Ankrd33b	-0.939658	-0.0641634	0.497906	1	M	0.948951	0.487974
Ankrd34a	1.6685	-1.13913	0.658385	1	M	0.105439	0.365981
Ankrd34b	4.1903	-1.55428	0.52381	1	M	0	0.243987
Ankrd34c	5.12548e-15	-2.14415	1	1	M	0	0
Ankrd35	-0.43547	0.310715	0.866239	1	M	1.15983	0.853955
Ankrd36	0.121699	8.59961	0.852958	1	M	371.356	404.043
Ankrd37	0.208768	1.029	0.913871	1	M	1.68702	1.9519
Ankrd39	-0.705705	2.90337	0.326217	1	M	8.96232	5.48971
Ankrd40	-0.344671	5.70507	0.604824	1	M	58.0969	45.7476
Ankrd42	0.417357	7.92851	0.525269	1	M	208.453	278.389
Ankrd44	-0.470459	2.85463	0.527935	1	M	8.1188	5.85569
Ankrd45	0.019059	6.06353	0.979202	1	M	66.2157	67.0964
Ankrd46	-0.27648	4.06148	0.690246	1	M	18.0301	14.8832
Ankrd49	0.32417	5.6253	0.627709	1	M	43.6517	54.6531
Ankrd50	0.319011	2.23838	0.688962	1	M	4.00668	5.00173
Ankrd52	-0.529356	3.69178	0.444499	1	M	14.9723	10.3695
Ankrd54	-0.0822783	8.60505	0.900446	1	M	400.246	378.058
Ankrd55	0.442511	4.69068	0.512322	1	M	21.7204	29.5224
Ankrd6	-0.589961	0.549276	0.662736	1	M	1.47615	0.975948
Ankrd60	0.301109	6.35332	0.648608	1	M	73.0692	90.0312
Ankrd61	0.802494	6.05725	0.228626	1	M	48.3965	84.4195
Ankrd63	-1.81331	1.6069	0.0365433	0.539162	M	4.323	1.21994
Ankrd66	5.12548e-15	-2.14415	1	1	M	0	0
Ankrd7	0.147816	5.78729	0.825108	1	M	52.1923	57.8249
Anks1	-0.126557	4.46275	0.857915	1	M	22.7748	20.8609
Anks1b	0.516292	3.31371	0.478105	1	M	8.01336	11.4674
Anks3	-0.329126	4.83077	0.631453	1	M	31.4208	25.0087
Anks4b	-1.22838	1.32785	0.165529	1	M	3.16317	1.34193
Anks6	1.05339	1.78385	0.202662	1	M	2.10878	4.39177
Ankub1	5.12548e-15	-2.14415	1	1	M	0	0
Ankzf1	1.30265	2.4565	0.0838286	0.892867	M	3.05773	7.5636
Anln	0.00603554	5.49268	0.995595	1	M	44.7061	44.8936
Ano1	-0.775165	3.22674	0.278727	1	M	11.4929	6.70964
Ano10	-0.0339368	6.4349	0.96091	1	M	87.3035	85.2735
Ano2	-0.911528	0.169305	0.438083	1	M	1.15983	0.609968
Ano3	-1.73231	-0.347048	0.266667	1	M	0.843512	0.243987
Ano4	-0.269347	-0.146269	0.822492	1	M	0.738073	0.609968
Ano5	-0.698225	3.59698	0.326566	1	M	14.656	9.02752
Ano6	-0.165849	2.92816	0.824692	1	M	7.80249	6.95363
Ano7	-1.67897	-0.979877	0.430642	1	M	0.421756	0.121994
Ano8	0.343803	0.503797	0.763627	1	M	1.05439	1.34193
Ano9	0.198042	-1.14352	1	1	M	0.210878	0.243987
Anp32a	-0.100597	2.81895	0.918577	1	M	7.06441	6.58765
Anp32b	-0.266205	6.47219	0.687234	1	M	96.6876	80.3937
Anp32e	-0.215022	3.18068	0.769137	1	M	9.48951	8.17357
Anpep	0.932098	0.186839	0.479207	1	M	0.632634	1.21994
Antxr1	1.42272	1.33898	0.0994744	0.954401	M	1.26527	3.41582
Antxr2	0.210051	3.14719	0.785847	1	M	8.01336	9.27151
Anxa1	1.5879	1.99688	0.0519562	0.677577	M	1.8979	5.7337
Anxa10	5.12548e-15	-2.14415	1	1	M	0	0
Anxa11	-0.420222	3.5781	0.55097	1	M	13.3908	10.0035
Anxa13	-4.54668	-1.34301	0.285714	1	M	0.316317	0
Anxa2	0.49274	5.77532	0.458948	1	M	45.3388	63.8026
Anxa4	0.81609	2.65802	0.268476	1	M	4.42844	7.80759
Anxa5	0.749777	3.25218	0.290305	1	M	6.95897	11.7114
Anxa6	0.929541	3.081	0.191971	1	M	5.69371	10.8574
Anxa7	0.138519	4.52573	0.838475	1	M	21.7204	23.9107
Anxa8	1.11012	-1.33407	1	1	M	0.105439	0.243987
Anxa9	-1.8191	1.32041	0.0459806	0.624128	M	3.47949	0.975948
Aoah	-0.356382	-0.975593	1	1	M	0.316317	0.243987
Aoc1	5.12548e-15	-2.14415	1	1	M	0	0
Aoc2	-0.461557	2.48838	0.552389	1	M	6.2209	4.51376
Aoc3	0.422557	1.72235	0.623857	1	M	2.63598	3.53781
Aox1	0.993902	3.38409	0.158938	1	M	6.85354	13.6633
Aox2	-0.051467	-0.237645	1	1	M	0.632634	0.609968
Aox3	-1.3513	3.3589	0.0600864	0.730158	M	14.3397	5.6117
Aox4	0.361447	2.49423	0.644386	1	M	4.74476	6.09968
Ap1ar	-0.0758665	4.69568	0.923978	1	M	26.3598	25.0087
Ap1b1	-0.104962	6.29406	0.876233	1	M	81.0826	75.392
Ap1g1	-0.0371312	5.59771	0.963131	1	M	48.8183	47.5775
Ap1g2	2.28812	1.24679	0.0102559	0.228607	M	0.738073	3.65981
Ap1m1	-0.00153332	8.5571	0.998667	1	M	376.628	376.228
Ap1m2	-0.109999	0.314107	1	1	M	1.05439	0.975948
Ap1s1	-0.340534	4.33277	0.623372	1	M	22.2476	17.5671
Ap1s2	1.2245	2.95414	0.0952723	0.937305	M	4.53388	10.6134
Ap1s3	-0.109999	0.314107	1	1	M	1.05439	0.975948
Ap2a1	0.187453	7.5403	0.775927	1	M	173.869	197.995
Ap2a2	0.388491	5.32241	0.562293	1	M	34.4786	45.1376
Ap2b1	0.100622	8.82978	0.878186	1	M	438.943	470.651
Ap2m1	-0.310288	6.1362	0.641461	1	M	77.6031	62.5827
Ap2s1	0.402664	6.20986	0.544892	1	M	63.5797	84.0535
Ap3b1	0.309764	7.3437	0.637978	1	M	144.873	179.574
Ap3b2	2.64142	-0.67334	0.186957	1	M	0.105439	0.731961
Ap3d1	0.136947	7.71331	0.835354	1	M	199.701	219.588
Ap3m1	0.205324	5.05015	0.764703	1	M	30.5773	35.2561
Ap3m2	-0.256803	2.70716	0.769296	1	M	6.85354	5.7337
Ap3s1	0.620554	5.38083	0.353319	1	M	32.6861	50.2613
Ap3s2	-0.134099	4.7939	0.844274	1	M	28.7848	26.2286
Ap4b1	0.188026	6.05104	0.777967	1	M	61.7873	70.3903
Ap4e1	0.466439	4.51135	0.492514	1	M	18.979	26.2286
Ap4m1	0.758764	5.18514	0.258734	1	M	26.8869	45.5036
Ap4s1	0.335471	3.42031	0.649275	1	M	9.27863	11.7114
Ap5b1	-0.385838	4.89016	0.568538	1	M	33.3187	25.4966
Ap5m1	-0.0591192	3.22048	0.958733	1	M	9.27863	8.90553
Ap5s1	-0.11125	2.53955	0.901936	1	M	5.79915	5.36772
Ap5z1	-0.558796	3.58758	0.425204	1	M	14.0234	9.5155
Apaf1	0.692874	1.87038	0.37428	1	M	2.63598	4.26977
Apba1	-0.286307	7.64045	0.6633	1	M	218.997	179.574
Apba2	2.07006	-0.967001	0.430642	1	M	0.105439	0.487974
Apba3	-0.257789	4.79858	0.70842	1	M	30.0501	25.1307
Apbb1	0.200168	4.04705	0.777915	1	M	15.1832	17.4451
Apbb1ip	-1.70899	0.878787	0.104627	0.98098	M	2.4251	0.731961
Apbb2	0.690923	1.18912	0.438358	1	M	1.58159	2.56186
Apbb3	-0.0350477	3.95804	0.962233	1	M	15.4995	15.1272
Apc	0.157472	4.96445	0.81766	1	M	29.312	32.6943
Apc2	0.690923	1.18912	0.438358	1	M	1.58159	2.56186
Apcdd1	-1.13919	0.699835	0.285115	1	M	1.8979	0.853955
Apcs	5.12548e-15	-2.14415	1	1	M	0	0
Apeh	0.750251	3.97714	0.275634	1	M	11.5983	19.519
Apela	5.12548e-15	-2.14415	1	1	M	0	0
Apex1	0.849213	5.12498	0.204582	1	M	24.7782	44.6496
Apex2	-0.136159	0.712027	1	1	M	1.47615	1.34193
Aph1a	-0.435921	3.47972	0.53997	1	M	12.5472	9.27151
Aph1b	0.858347	1.73093	0.287651	1	M	2.21422	4.02579
Aph1c	-0.237663	3.99308	0.734417	1	M	16.9757	14.3952
Api5	-0.164737	6.90731	0.803525	1	M	126.632	112.966
Apip	0.294084	4.30829	0.671463	1	M	17.6083	21.5929
Aplf	-0.0525465	3.05406	0.953864	1	M	8.22424	7.92958
Apln	1.22005	3.49056	0.082883	0.892867	M	6.64266	15.4932
Aplnr	-0.725021	-1.33855	1	1	M	0.210878	0.121994
Aplp1	1.1376	4.7994	0.0936307	0.931216	M	17.292	38.062
Aplp2	-0.468075	7.94382	0.476329	1	M	285.529	206.413
Apmap	-0.269898	3.56206	0.710784	1	M	12.6527	10.4914
Apoa1	-3.08018	-1.82439	1	1	M	0.105439	0
Apoa2	-1.08954	0.0167486	0.390133	1	M	1.05439	0.487974
Apoa4	5.12548e-15	-2.14415	1	1	M	0	0
Apoa5	5.12548e-15	-2.14415	1	1	M	0	0
Apob	3.26724	-1.81972	1	1	M	0	0.121994
Apobec1	-0.510065	-0.562057	0.769726	1	M	0.527195	0.365981
Apobec2	0.205273	-0.335381	1	1	M	0.527195	0.609968
Apobec3	-0.110505	0.808508	1	1	M	1.58159	1.46392
Apobec4	0.752251	4.41142	0.268172	1	M	15.7104	26.4726
Apobr	6.92828	0.0531056	0.00140897	0.0498823	M	0	1.70791
Apoc1	2.21898	4.31001	0.00175971	0.0598933	M	6.95897	32.4503
Apoc2	5.12548e-15	-2.14415	1	1	M	0	0
Apoc3	5.12548e-15	-2.14415	1	1	M	0	0
Apoc4	5.12548e-15	-2.14415	1	1	M	0	0
Apod	0.187059	-1.55886	1	1	M	0.105439	0.121994
Apoe	1.71831	6.24663	0.0112257	0.244693	M	35.3221	116.26
Apof	1.72933	-0.54991	0.372947	1	M	0.210878	0.731961
Apoh	1.23041	3.56367	0.0795016	0.870688	M	6.95897	16.3471
Apol10a	-3.99226	-1.56342	0.52381	1	M	0.210878	0
Apol10b	4.1903	-1.55428	0.52381	1	M	0	0.243987
Apol11a	-3.99226	-1.56342	0.52381	1	M	0.210878	0
Apol11b	5.12548e-15	-2.14415	1	1	M	0	0
Apol6	-0.202214	0.497321	1	1	M	1.26527	1.09794
Apol7a	5.12548e-15	-2.14415	1	1	M	0	0
Apol7c	1.1164	0.777622	0.241983	1	M	0.948951	2.07389
Apol7d	4.1903	-1.55428	0.52381	1	M	0	0.243987
Apol7e	5.12548e-15	-2.14415	1	1	M	0	0
Apol8	0.187059	-1.55886	1	1	M	0.105439	0.121994
Apol9a	5.12548e-15	-2.14415	1	1	M	0	0
Apol9b	1.11012	-1.33407	1	1	M	0.105439	0.243987
Apold1	1.17491	-0.436454	0.585507	1	M	0.316317	0.731961
Apom	-0.984686	-0.343164	0.442579	1	M	0.738073	0.365981
Apon	5.12548e-15	-2.14415	1	1	M	0	0
Apoo	1.65343	0.966345	0.0625616	0.74942	M	0.843512	2.68386
Apoo-ps	5.12548e-15	-2.14415	1	1	M	0	0
Apool	0.207519	0.317501	0.866239	1	M	0.948951	1.09794
Apopt1	-0.190004	4.30917	0.784027	1	M	20.8769	18.299
App	0.570142	5.78698	0.389824	1	M	44.2844	65.7545
Appbp2	0.577802	5.78123	0.385787	1	M	43.9681	65.6325
Appbp2os	0.301078	0.9897	0.824298	1	M	1.58159	1.9519
Appl1	-0.0974338	4.85259	0.890815	1	M	29.6284	27.6925
Appl2	-0.14532	5.5144	0.831899	1	M	47.7639	43.1857
Aprt	0.150028	6.90286	0.820854	1	M	113.241	125.653
Aptx	-0.0341761	5.40349	0.962571	1	M	42.5974	41.5998
Aqp1	-1.27945	-1.14789	0.658385	1	M	0.316317	0.121994
Aqp11	0.432484	7.55829	0.510875	1	M	160.267	216.295
Aqp12	-0.197527	-0.685733	1	1	M	0.421756	0.365981
Aqp2	1.45389	3.63193	0.0411934	0.574876	M	6.53722	17.933
Aqp3	0.201995	-0.821308	1	1	M	0.316317	0.365981
Aqp4	5.12548e-15	-2.14415	1	1	M	0	0
Aqp5	-0.108507	-0.444399	1	1	M	0.527195	0.487974
Aqp6	5.12548e-15	-2.14415	1	1	M	0	0
Aqp8	-1.8932	3.11405	0.0100716	0.226272	M	13.1799	3.53781
Aqp9	0.240866	6.75316	0.715824	1	M	98.6909	116.626
Aqr	0.0398881	6.07399	0.955749	1	M	66.2157	68.0724
Ar	0.665852	2.83934	0.359789	1	M	5.37739	8.53955
Araf	0.0244936	3.30777	1	1	M	9.59495	9.75948
Arap1	1.19951	0.960649	0.199929	1	M	1.05439	2.43987
Arap2	-0.985112	2.6895	0.186184	1	M	8.22424	4.14778
Arap3	1.60396	0.574808	0.0967864	0.943625	M	0.632634	1.9519
Arc	0.219096	7.93688	0.738815	1	M	226.272	263.384
Arcn1	0.0115376	6.81843	0.987724	1	M	112.187	113.088
Areg	-3.08018	-1.82439	1	1	M	0.105439	0
Arel1	-0.573854	5.89013	0.389555	1	M	70.6441	47.4555
Arf1	0.251783	7.68987	0.701791	1	M	188.314	224.224
Arf2	0.35495	4.28936	0.61344	1	M	16.9757	21.7148
Arf3	-0.326372	6.31914	0.622771	1	M	88.5688	70.6343
Arf4	0.401069	6.13554	0.54727	1	M	60.4166	79.7838
Arf5	0.219299	5.19872	0.745083	1	M	33.7405	39.2819
Arf6	0.24653	5.35817	0.715738	1	M	37.3254	44.2837
Arfgap1	0.378872	5.46694	0.568713	1	M	38.2744	49.7734
Arfgap2	-0.405166	6.97405	0.539	1	M	142.975	107.964
Arfgap3	0.0952656	6.77736	0.886442	1	M	105.861	113.088
Arfgef1	0.0441317	6.92149	0.948015	1	M	119.146	122.847
Arfgef2	-0.104734	6.52368	0.875005	1	M	95.106	88.4453
Arfgef3	-0.167201	1.4966	0.93615	1	M	2.74141	2.43987
Arfip1	0.228411	3.19327	0.750238	1	M	8.22424	9.63749
Arfip2	0.0883019	3.62006	0.9053	1	M	11.7037	12.4433
Arfrp1	-0.193891	4.75028	0.775186	1	M	28.4685	24.8867
Arg1	-3.99226	-1.56342	0.52381	1	M	0.210878	0
Arg2	0.775388	-0.331482	0.7999	1	M	0.421756	0.731961
Arglu1	0.115477	5.74709	0.867443	1	M	51.3488	55.629
Arhgap1	0.139912	4.40343	0.84324	1	M	19.928	21.9588
Arhgap10	0.51947	4.89281	0.44477	1	M	24.251	34.7682
Arhgap11a	0.0331302	4.22323	0.96853	1	M	18.2409	18.665
Arhgap12	-0.0911407	3.46786	0.912832	1	M	11.1765	10.4914
Arhgap15	2.30515	-0.222313	0.0999758	0.954401	M	0.210878	1.09794
Arhgap15os	0.187059	-1.55886	1	1	M	0.105439	0.121994
Arhgap17	0.812033	3.58033	0.24571	1	M	8.54056	15.0052
Arhgap18	-0.319381	2.68051	0.678827	1	M	6.85354	5.48971
Arhgap19	-0.265858	7.53417	0.686187	1	M	202.127	168.107
Arhgap20	-0.778556	5.79685	0.242748	1	M	69.9061	40.7458
Arhgap20os	-3.08018	-1.82439	1	1	M	0.105439	0
Arhgap21	0.639422	3.30887	0.374151	1	M	7.59161	11.8334
Arhgap22	0.838383	0.621224	0.395441	1	M	0.948951	1.70791
Arhgap23	-0.19578	5.43598	0.773734	1	M	45.9714	40.1359
Arhgap24	1.6292	1.58543	0.0497057	0.656751	M	1.37071	4.26977
Arhgap25	1.11012	-1.33407	1	1	M	0.105439	0.243987
Arhgap26	-1.00039	2.27635	0.194519	1	M	6.11546	3.04984
Arhgap27	1.18357	-0.134989	0.390133	1	M	0.421756	0.975948
Arhgap27os3	5.12548e-15	-2.14415	1	1	M	0	0
Arhgap28	-0.212852	2.49442	0.799731	1	M	5.79915	5.00173
Arhgap29	-0.104472	8.20963	0.873879	1	M	306.511	285.099
Arhgap30	-1.57455	3.39208	0.0276127	0.454929	M	15.2887	5.12373
Arhgap31	-0.67845	2.75731	0.35139	1	M	8.01336	5.00173
Arhgap32	-0.658431	4.05474	0.338538	1	M	20.0334	12.6873
Arhgap33	-0.13069	7.31112	0.843279	1	M	165.75	151.394
Arhgap33os	-0.540548	5.78282	0.417059	1	M	64.9504	44.6496
Arhgap35	-0.200369	6.94016	0.761818	1	M	131.061	114.064
Arhgap36	2.30515	-0.222313	0.0999758	0.954401	M	0.210878	1.09794
Arhgap39	-0.374478	5.91837	0.574051	1	M	68.0082	52.4572
Arhgap4	0.756419	-0.971301	1	1	M	0.210878	0.365981
Arhgap40	2.40686	1.13682	0.00792498	0.19024	M	0.632634	3.41582
Arhgap42	0.732379	0.565222	0.465039	1	M	0.948951	1.58592
Arhgap44	-0.170375	4.19027	0.818739	1	M	19.0845	16.9571
Arhgap45	1.17491	-0.436454	0.585507	1	M	0.316317	0.731961
Arhgap5	0.226589	7.04199	0.731375	1	M	121.255	141.878
Arhgap6	1.11012	-1.33407	1	1	M	0.105439	0.243987
Arhgap8	-0.356382	-0.975593	1	1	M	0.316317	0.243987
Arhgap9	0.204032	-0.558014	1	1	M	0.421756	0.487974
Arhgdia	0.222565	6.07434	0.739045	1	M	61.9981	72.3422
Arhgdib	2.40038	1.5087	0.00532896	0.14254	M	0.843512	4.51376
Arhgdig	0.645989	1.07542	0.524474	1	M	1.47615	2.31788
Arhgef1	-0.283888	4.44284	0.68199	1	M	23.6183	19.397
Arhgef10	-0.464136	5.9392	0.484835	1	M	70.855	51.3593
Arhgef10l	0.331522	3.46558	0.659146	1	M	9.59495	12.0774
Arhgef11	-0.0385804	5.73868	0.959125	1	M	53.8793	52.4572
Arhgef12	-0.0740306	5.29626	0.919456	1	M	40.0668	38.062
Arhgef15	0.90192	3.21204	0.212104	1	M	6.32634	11.8334
Arhgef16	-0.356382	-0.975593	1	1	M	0.316317	0.243987
Arhgef17	1.31156	3.13909	0.0730116	0.824837	M	4.95563	12.3213
Arhgef18	-0.768787	4.17639	0.261588	1	M	22.4585	13.1753
Arhgef19	1.63738	0.118226	0.187026	1	M	0.421756	1.34193
Arhgef25	-0.892289	3.57839	0.202362	1	M	15.1832	8.17357
Arhgef26	4.74868	-1.32959	0.285714	1	M	0	0.365981
Arhgef28	1.19237	0.327698	0.324544	1	M	0.632634	1.46392
Arhgef3	-0.674077	2.91485	0.367428	1	M	8.96232	5.6117
Arhgef33	-0.239114	4.55539	0.7281	1	M	25.1999	21.3489
Arhgef37	-2.6819	0.735549	0.00910829	0.211097	M	2.4251	0.365981
Arhgef38	5.12548e-15	-2.14415	1	1	M	0	0
Arhgef39	-0.24352	3.76131	0.745039	1	M	14.4451	12.1994
Arhgef4	0.78193	0.111075	0.580436	1	M	0.632634	1.09794
Arhgef40	0.814111	1.70486	0.313932	1	M	2.21422	3.90379
Arhgef5	0.409641	1.41785	0.676811	1	M	2.10878	2.80585
Arhgef6	-2.42217	2.31777	0.00274552	0.0857448	M	7.90793	1.46392
Arhgef7	-0.218236	6.04913	0.743094	1	M	70.9605	60.9968
Arhgef9	0.756419	-0.971301	1	1	M	0.210878	0.365981
Arid1a	-0.405728	6.75895	0.539328	1	M	123.153	92.9591
Arid1b	0.225209	3.46985	0.757802	1	M	10.0167	11.7114
Arid2	-0.418796	8.82458	0.523109	1	M	518.444	387.817
Arid3a	1.17588	4.49283	0.0865078	0.906379	M	13.7071	30.9864
Arid3b	0.435691	6.09632	0.509844	1	M	57.9915	78.4418
Arid3c	0.187059	-1.55886	1	1	M	0.105439	0.121994
Arid4a	-0.283366	4.5296	0.683748	1	M	25.0945	20.6169
Arid4b	-0.0331163	5.62123	0.963722	1	M	49.5563	48.4314
Arid5a	0.786415	3.20892	0.263882	1	M	6.64266	11.4674
Arid5b	-0.408992	2.98429	0.581159	1	M	8.75144	6.58765
Arih1	0.109237	6.98258	0.869347	1	M	121.466	131.021
Arih2	0.368527	7.60844	0.575181	1	M	170.179	219.71
Arl1	0.16771	5.85464	0.802866	1	M	54.3011	60.9968
Arl10	0.205273	-0.335381	1	1	M	0.527195	0.609968
Arl11	0.891712	2.14269	0.258293	1	M	2.95229	5.48971
Arl13a	2.53505	4.0872	0.000509976	0.0220434	M	4.95563	28.7905
Arl13b	0.801444	5.01952	0.233781	1	M	23.5129	40.9898
Arl14	5.12548e-15	-2.14415	1	1	M	0	0
Arl14ep	0.880883	5.23407	0.18876	1	M	26.3598	48.5534
Arl14epl	-0.112292	5.53321	0.867658	1	M	47.8693	44.2837
Arl15	0.148209	1.53107	0.87496	1	M	2.53054	2.80585
Arl16	0.228882	3.15695	0.766387	1	M	8.01336	9.3935
Arl2	1.68285	4.33218	0.0160025	0.315553	M	9.48951	30.4984
Arl2bp	0.044143	7.43769	0.947439	1	M	170.495	175.793
Arl3	0.423417	7.33554	0.520113	1	M	137.809	184.82
Arl4a	0.613831	8.23237	0.35055	1	M	237.554	363.541
Arl4c	-0.315884	2.29135	0.701882	1	M	5.16651	4.14778
Arl4d	-1.1316	2.30632	0.140598	1	M	6.43178	2.92784
Arl5a	0.319011	2.23838	0.688962	1	M	4.00668	5.00173
Arl5b	0.816099	3.27134	0.249978	1	M	6.85354	12.0774
Arl5c	5.15024	-1.13474	0.161491	1	M	0	0.487974
Arl6	0.23766	4.91641	0.730294	1	M	27.5196	32.4503
Arl6ip1	-0.325706	7.529	0.620524	1	M	205.184	163.715
Arl6ip4	-0.104611	5.41831	0.87527	1	M	44.0735	40.9898
Arl6ip5	0.209966	2.83876	0.789754	1	M	6.43178	7.44161
Arl6ip6	0.795212	6.33884	0.232043	1	M	59.0458	102.475
Arl8a	-1.08406	2.79454	0.144787	1	M	9.06775	4.26977
Arl8b	0.213343	6.78826	0.747066	1	M	102.17	118.456
Arl9	-1.85782	2.82438	0.0136967	0.283888	M	10.6493	2.92784
Armc1	0.116285	3.63415	0.87506	1	M	11.7037	12.6873
Armc10	-0.0747425	2.08299	0.955638	1	M	4.11212	3.90379
Armc12	1.21721	6.15664	0.068648	0.797538	M	42.8082	99.5467
Armc2	0.414052	6.04152	0.532756	1	M	56.3044	75.026
Armc3	0.380076	7.49975	0.563426	1	M	157.104	204.461
Armc4	0.388174	5.75503	0.559992	1	M	46.604	60.9968
Armc5	0.353892	3.91673	0.613313	1	M	13.0744	16.7131
Armc6	0.0846354	2.4429	0.965301	1	M	5.06107	5.36772
Armc7	-0.62401	2.19927	0.409516	1	M	5.27195	3.41582
Armc8	-0.247846	5.565	0.712665	1	M	51.1379	43.0637
Armc9	-0.0292205	6.76395	0.966364	1	M	109.551	107.354
Armcx1	0.899659	0.51028	0.361697	1	M	0.843512	1.58592
Armcx2	1.60672	2.97364	0.0272074	0.450538	M	3.7958	11.5894
Armcx3	1.04334	2.23724	0.172071	1	M	2.95229	6.09968
Armcx4	1.17491	-0.436454	0.585507	1	M	0.316317	0.731961
Armcx5	1.06375	1.00093	0.25882	1	M	1.15983	2.43987
Armcx6	0.73653	2.64282	0.318426	1	M	4.53388	7.5636
Armt1	-0.262589	7.39193	0.690049	1	M	182.937	152.492
Arnt	-0.179187	4.37753	0.802888	1	M	21.8259	19.275
Arnt2	-0.673803	0.433342	0.63922	1	M	1.37071	0.853955
Arntl	-0.192287	2.09945	0.825983	1	M	4.323	3.7818
Arntl2	-0.136159	0.712027	1	1	M	1.47615	1.34193
Arpc1a	0.147236	6.33374	0.826078	1	M	76.3378	84.5415
Arpc1b	0.316331	4.10907	0.648472	1	M	15.1832	18.909
Arpc2	0.268858	7.22028	0.683256	1	M	135.067	162.739
Arpc3	0.767977	4.19299	0.263096	1	M	13.3908	22.8128
Arpc4	-0.149783	3.28616	0.861851	1	M	10.0167	9.02752
Arpc5	0.645811	3.80635	0.35844	1	M	10.7548	16.8351
Arpc5l	0.464839	6.53227	0.482175	1	M	77.6031	107.11
Arpin	1.75073	-0.131221	0.189984	1	M	0.316317	1.09794
Arpp19	-0.12481	4.47016	0.858624	1	M	22.8803	20.9829
Arpp21	0.681331	-0.138753	0.670342	1	M	0.527195	0.853955
Arr3	5.12548e-15	-2.14415	1	1	M	0	0
Arrb1	-1.50623	3.30844	0.0352455	0.52547	M	14.2343	5.00173
Arrb2	1.99071	1.84735	0.016233	0.318399	M	1.37071	5.48971
Arrdc1	0.529848	1.72449	0.527497	1	M	2.53054	3.65981
Arrdc2	-0.131866	3.86299	0.852725	1	M	14.9723	13.6633
Arrdc3	-0.0620764	6.98613	0.926225	1	M	129.268	123.823
Arrdc4	0.611597	2.1176	0.449741	1	M	3.26861	5.00173
Arsa	-0.107688	8.16173	0.870042	1	M	296.811	275.461
Arsb	0.262096	3.684	0.703833	1	M	11.4929	13.7853
Arsg	0.0808118	2.00737	1	1	M	3.69037	3.90379
Arsi	0.187059	-1.55886	1	1	M	0.105439	0.121994
Arsj	5.12548e-15	-2.14415	1	1	M	0	0
Arsk	-0.067023	3.08279	0.954462	1	M	8.43512	8.05157
Art1	-0.641447	2.10848	0.411671	1	M	4.95563	3.17183
Art2a-ps	5.12548e-15	-2.14415	1	1	M	0	0
Art2b	-3.08018	-1.82439	1	1	M	0.105439	0
Art3	-0.00793439	8.06349	0.991086	1	M	268.026	266.556
Art4	-0.365247	-0.339275	0.7999	1	M	0.632634	0.487974
Art5	-0.335226	5.73759	0.613297	1	M	59.2567	46.9675
Artn	0.491761	1.64686	0.55548	1	M	2.4251	3.41582
Arv1	-0.0466322	2.40929	0.964601	1	M	5.16651	5.00173
Arvcf	0.698954	2.58775	0.357297	1	M	4.42844	7.19762
Arx	1.0681	0.258933	0.394643	1	M	0.632634	1.34193
Arxes1	-3.08018	-1.82439	1	1	M	0.105439	0
Arxes2	-0.949486	0.750554	0.366588	1	M	1.8979	0.975948
As3mt	-0.10571	4.27451	0.878522	1	M	19.8225	18.421
Asah1	0.533761	4.37295	0.436561	1	M	16.7648	24.2767
Asah2	0.328976	1.56257	0.698707	1	M	2.4251	3.04984
Asap1	0.357811	7.10524	0.587158	1	M	120.517	154.444
Asap2	2.02619	1.05394	0.0236355	0.403508	M	0.738073	3.04984
Asap3	-0.552481	1.703	0.527497	1	M	3.58493	2.43987
Asb1	-0.382684	6.50599	0.562632	1	M	102.592	78.6858
Asb10	-0.197527	-0.685733	1	1	M	0.421756	0.365981
Asb11	1.15798	-0.817097	0.726708	1	M	0.210878	0.487974
Asb12	-1.10042	0.841291	0.270771	1	M	2.10878	0.975948
Asb13	-0.0117701	-0.0567904	1	1	M	0.738073	0.731961
Asb14	-0.261993	1.40575	0.795106	1	M	2.63598	2.19588
Asb16	5.12548e-15	-2.14415	1	1	M	0	0
Asb17os	-1.67897	-0.979877	0.430642	1	M	0.421756	0.121994
Asb18	-3.08018	-1.82439	1	1	M	0.105439	0
Asb2	-0.123427	1.66077	0.942485	1	M	3.05773	2.80585
Asb3	-0.041118	4.56185	0.958253	1	M	23.7238	23.0568
Asb4	0.351496	5.55098	0.602049	1	M	41.0158	52.3352
Asb5	-0.518185	0.172806	0.700311	1	M	1.05439	0.731961
Asb6	0.0753784	3.62631	0.921383	1	M	11.8092	12.4433
Asb7	-0.664889	3.7726	0.346604	1	M	16.4485	10.3695
Asb8	-0.776736	4.30734	0.254745	1	M	24.6727	14.3952
Ascc1	-0.842346	5.10215	0.209856	1	M	43.7572	24.3987
Ascc2	-0.211958	6.86235	0.748566	1	M	124.629	107.598
Ascc3	0.0619326	5.60618	0.92676	1	M	47.4476	49.5294
Ascl1	5.12548e-15	-2.14415	1	1	M	0	0
Ascl2	1.72933	-0.54991	0.372947	1	M	0.210878	0.731961
Ascl3	6.12978	-0.541782	0.0219002	0.387187	M	0	0.975948
Ascl4	5.12548e-15	-2.14415	1	1	M	0	0
Ascl5	3.26724	-1.81972	1	1	M	0	0.121994
Asdurf	5.12548e-15	-2.14415	1	1	M	0	0
Asf1a	0.250635	4.35984	0.718997	1	M	18.5573	22.0808
Asf1b	0.0528405	5.73267	0.940257	1	M	51.9814	53.9211
Asgr1	1.44911	0.262392	0.228158	1	M	0.527195	1.46392
Asgr2	3.26724	-1.81972	1	1	M	0	0.121994
Ash1l	-0.34173	5.7997	0.605948	1	M	61.9981	48.9194
Ash2l	0.00953899	7.544	0.989441	1	M	185.784	187.016
Asic1	1.11012	-1.33407	1	1	M	0.105439	0.243987
Asic2	0.756419	-0.971301	1	1	M	0.210878	0.365981
Asic3	-1.69436	1.38394	0.0565605	0.703864	M	3.58493	1.09794
Asic4	-1.17394	-0.245283	0.442579	1	M	0.843512	0.365981
Asic5	5.12548e-15	-2.14415	1	1	M	0	0
Asl	0.197117	3.67562	0.788574	1	M	11.7037	13.4193
Asmt	5.12548e-15	-2.14415	1	1	M	0	0
Asna1	0.432706	6.24828	0.51389	1	M	64.5287	87.1034
Asns	-0.747945	4.15017	0.277369	1	M	21.9313	13.0533
Asnsd1	0.180009	7.60379	0.784565	1	M	182.199	206.413
Aspa	0.553166	2.80125	0.446606	1	M	5.48283	8.05157
Aspdh	1.11012	-1.33407	1	1	M	0.105439	0.243987
Aspg	0.201995	-0.821308	1	1	M	0.316317	0.365981
Asph	1.00996	2.67584	0.169541	1	M	4.11212	8.29556
Asphd1	2.38384	-0.81288	0.282609	1	M	0.105439	0.609968
Asphd2	2.07006	-0.967001	0.430642	1	M	0.105439	0.487974
Aspm	-0.0276089	4.79156	0.971524	1	M	27.7305	27.2046
Aspn	5.7216	-0.808655	0.0565217	0.703864	M	0	0.731961
Asprv1	0.917334	-0.553965	0.769726	1	M	0.316317	0.609968
Aspscr1	0.0290802	7.37653	0.965801	1	M	164.274	167.619
Asrgl1	-0.0511724	10.0505	0.937792	1	M	1079.06	1041.46
Ass1	5.12548e-15	-2.14415	1	1	M	0	0
Aste1	0.704888	5.95171	0.290576	1	M	46.9204	76.4899
Astl	5.12548e-15	-2.14415	1	1	M	0	0
Astn1	4.1903	-1.55428	0.52381	1	M	0	0.243987
Astn2	-0.356382	-0.975593	1	1	M	0.316317	0.243987
Asxl1	0.157384	7.48812	0.81133	1	M	169.546	189.09
Asxl2	-0.52973	6.31119	0.422938	1	M	93.5244	64.7786
Asxl3	0.602851	1.45182	0.511408	1	M	2.00334	3.04984
Asz1	0.336977	5.19375	0.619809	1	M	32.1589	40.6238
Atad1	-0.742791	5.07463	0.27173	1	M	41.8593	25.0087
Atad2	-0.145907	4.56187	0.834451	1	M	24.5673	22.2028
Atad2b	-0.219644	3.98341	0.756176	1	M	16.7648	14.3952
Atad3a	0.751068	4.00331	0.277162	1	M	11.8092	19.8849
Atad3aos	0.431123	1.97377	0.596551	1	M	3.16317	4.26977
Atad5	2.16291	3.31987	0.00301532	0.0914084	M	3.58493	16.1031
Atat1	-0.672138	4.29007	0.325022	1	M	23.7238	14.8832
Atcay	0.46285	-0.233819	1	1	M	0.527195	0.731961
Atcayos	-2.82266	-0.350927	0.084472	0.892867	M	0.948951	0.121994
Ate1	-0.0362352	5.87139	0.959314	1	M	59.0458	57.5809
Atf1	0.249099	6.89402	0.706048	1	M	108.497	128.947
Atf2	0.0193883	6.5474	0.978709	1	M	92.6809	93.935
Atf3	1.66981	4.17174	0.0165479	0.322947	M	8.54056	27.2046
Atf4	0.072651	6.11107	0.913852	1	M	67.1646	70.6343
Atf5	0.396766	3.02671	0.573479	1	M	6.85354	9.02752
Atf6	0.198469	4.805	0.776734	1	M	25.8326	29.6444
Atf6b	-0.133656	5.25643	0.845195	1	M	39.7505	36.2321
Atf7	0.0320422	4.79355	0.971524	1	M	27.2033	27.8145
Atf7ip	0.00094236	5.96962	1	1	M	62.4199	62.4607
Atf7ip2	0.342872	5.48972	0.609849	1	M	39.4342	50.0173
Atg10	0.895409	1.11791	0.307713	1	M	1.37071	2.56186
Atg101	0.304226	3.15909	0.685079	1	M	7.80249	9.63749
Atg12	0.283664	5.69384	0.671624	1	M	46.4986	56.605
Atg13	0.0157128	5.75424	0.981608	1	M	53.4576	54.0431
Atg14	0.324109	3.36516	0.654062	1	M	8.96232	11.2234
Atg16l1	0.142283	3.30291	0.863376	1	M	9.17319	10.1255
Atg16l2	-0.573125	0.935037	0.567307	1	M	2.00334	1.34193
Atg2a	-0.129697	6.71388	0.845296	1	M	109.446	100.035
Atg2b	0.0950751	6.23749	0.886928	1	M	72.7529	77.7099
Atg3	0.333208	4.82409	0.623159	1	M	24.8836	31.3523
Atg4a	0.651478	0.7716	0.521385	1	M	1.15983	1.8299
Atg4b	0.0931288	5.48842	0.889917	1	M	43.23	46.1136
Atg4c	-0.403275	4.69437	0.552345	1	M	29.2066	22.0808
Atg4d	-0.353827	5.30123	0.595272	1	M	43.9681	34.4022
Atg5	1.24493	2.79448	0.0870481	0.909864	M	4.00668	9.5155
Atg7	-0.0361897	5.82181	0.961403	1	M	57.0425	55.629
Atg9a	-0.0238739	8.10024	0.971645	1	M	276.461	271.924
Atg9b	-0.556975	1.48957	0.511408	1	M	3.05773	2.07389
Atic	0.544645	3.1095	0.446133	1	M	6.85354	10.0035
Atl1	0.0104148	5.66999	0.988305	1	M	50.5053	50.8713
Atl2	0.246029	6.01422	0.71379	1	M	58.9404	69.9023
Atl3	-2.33482	5.549	0.000849305	0.0328398	M	77.6031	15.3712
Atm	0.62777	4.08506	0.357728	1	M	13.1799	20.3729
Atmin	0.037294	5.78196	0.960297	1	M	54.0902	55.5071
Atn1	0.741153	4.2846	0.275944	1	M	14.4451	24.1547
Atoh1	3.26724	-1.81972	1	1	M	0	0.121994
Atoh7	5.12548e-15	-2.14415	1	1	M	0	0
Atoh8	1.03861	6.8812	0.117645	1	M	77.0759	158.348
Atox1	-0.0915856	4.79824	0.900951	1	M	28.4685	26.7166
Atp10a	0.968579	5.44873	0.147616	1	M	29.4175	57.5809
Atp10b	0.205273	-0.335381	1	1	M	0.527195	0.609968
Atp10d	0.606921	3.47364	0.388732	1	M	8.646	13.1753
Atp11a	-0.0414631	6.77993	0.951488	1	M	111.238	108.086
Atp11b	-0.205912	6.17955	0.759213	1	M	77.3922	67.0964
Atp11c	1.52989	3.43719	0.0311258	0.488389	M	5.48283	15.8592
Atp12a	-3.08018	-1.82439	1	1	M	0.105439	0
Atp13a1	-0.264194	5.37821	0.69264	1	M	45.1279	37.574
Atp13a2	-0.769644	4.63537	0.256173	1	M	30.9991	18.177
Atp13a3	0.722037	4.97003	0.282523	1	M	23.5129	38.7939
Atp13a4	0.374117	2.0737	0.659535	1	M	3.47949	4.51376
Atp13a5	1.11012	-1.33407	1	1	M	0.105439	0.243987
Atp1a1	-0.301786	6.39697	0.649741	1	M	92.7863	75.27
Atp1a2	-1.16822	5.06915	0.0852596	0.897021	M	46.0768	20.4949
Atp1a3	1.70593	0.832249	0.0694193	0.802364	M	0.738073	2.43987
Atp1b1	-1.6814	3.59914	0.0195221	0.366518	M	18.0301	5.6117
Atp1b2	-0.929788	4.39303	0.173982	1	M	27.2033	14.2732
Atp1b3	-0.483282	6.67735	0.464304	1	M	119.041	85.1515
Atp1b4	5.12548e-15	-2.14415	1	1	M	0	0
Atp23	0.700682	1.97956	0.374441	1	M	2.84685	4.63575
Atp2a1	-1.5695	0.300554	0.146765	1	M	1.47615	0.487974
Atp2a2	-0.347004	7.9624	0.597304	1	M	278.992	219.344
Atp2a3	0.42865	0.768591	0.701513	1	M	1.26527	1.70791
Atp2b1	0.0490528	3.50836	0.965924	1	M	10.9657	11.3454
Atp2b2	-1.99151	-0.829706	0.282609	1	M	0.527195	0.121994
Atp2b3	-1.90365	1.38152	0.0347653	0.520617	M	3.69037	0.975948
Atp2b4	-0.615004	7.37732	0.350777	1	M	200.861	131.143
Atp2c1	0.467594	4.08008	0.502655	1	M	14.0234	19.397
Atp2c2	-0.487053	1.3709	0.595081	1	M	2.74141	1.9519
Atp4a	0.46285	-0.233819	1	1	M	0.527195	0.731961
Atp4b	5.12548e-15	-2.14415	1	1	M	0	0
Atp5a1	-0.0207686	8.35892	0.975299	1	M	330.446	325.723
Atp5b	0.0706837	9.10797	0.91429	1	M	538.055	565.074
Atp5c1	0.0532171	6.32838	0.938189	1	M	78.6575	81.6137
Atp5d	0.421034	6.65213	0.524762	1	M	85.8274	114.918
Atp5e	0.174723	5.66766	0.795054	1	M	47.553	53.6772
Atp5f1	0.323594	6.73231	0.624203	1	M	94.2625	117.968
Atp5g1	0.460196	5.22023	0.490586	1	M	31.2099	42.9417
Atp5g2	0.785982	4.56083	0.24566	1	M	17.1866	29.6444
Atp5g3	0.0984713	5.46287	0.887963	1	M	42.3865	45.3816
Atp5h	0.247027	6.41437	0.709794	1	M	77.814	92.3491
Atp5j	0.343394	6.81863	0.603536	1	M	99.3235	126.019
Atp5j2	0.283971	5.62391	0.670832	1	M	44.2844	53.9211
Atp5k	-0.208995	5.00869	0.757521	1	M	34.2677	29.6444
Atp5l	0.647245	5.4648	0.332994	1	M	34.2677	53.6772
Atp5o	0.0650796	6.86028	0.922723	1	M	113.347	118.578
Atp5s	0.623279	4.74681	0.357005	1	M	20.9824	32.3283
Atp6ap1	0.289763	4.06469	0.680366	1	M	14.8669	18.177
Atp6ap1l	0.396802	5.66238	0.550811	1	M	43.5463	57.337
Atp6ap2	1.4009	3.44959	0.0482998	0.647873	M	5.90458	15.6152
Atp6v0a1	-0.123969	5.02159	0.854659	1	M	33.635	30.8644
Atp6v0a2	0.107781	5.07625	0.871504	1	M	32.2643	34.7682
Atp6v0a4	0.20611	-0.142513	1	1	M	0.632634	0.731961
Atp6v0b	-0.526191	4.3469	0.440976	1	M	23.7238	16.4691
Atp6v0c	5.12548e-15	-2.14415	1	1	M	0	0
Atp6v0c-ps2	5.12548e-15	-2.14415	1	1	M	0	0
Atp6v0d1	0.475836	5.13406	0.476865	1	M	29.2066	40.6238
Atp6v0d2	5.12548e-15	-2.14415	1	1	M	0	0
Atp6v0e	0.0838712	3.97742	0.913249	1	M	15.0778	15.9812
Atp6v0e2	-0.10467	3.4748	0.912832	1	M	11.282	10.4914
Atp6v1a	0.07983	6.8983	0.904848	1	M	115.772	122.36
Atp6v1b1	2.52763	3.61949	0.000566305	0.0237556	M	3.58493	20.7389
Atp6v1b2	-0.00445368	5.65659	1	1	M	50.2944	50.1393
Atp6v1c1	0.245655	6.02937	0.710917	1	M	59.573	70.6343
Atp6v1c2	1.66953	0.396776	0.148066	1	M	0.527195	1.70791
Atp6v1d	0.33928	7.0835	0.606726	1	M	119.568	151.272
Atp6v1e1	-0.108031	5.00195	0.877004	1	M	33.0024	30.6204
Atp6v1e2	2.10116	6.013	0.00229195	0.073867	M	24.3564	104.548
Atp6v1f	0.223598	5.63509	0.740943	1	M	45.6551	53.3112
Atp6v1g1	0.197583	7.14195	0.764666	1	M	131.377	150.662
Atp6v1g2	-0.757125	2.99554	0.299211	1	M	9.70039	5.7337
Atp6v1g3	5.12548e-15	-2.14415	1	1	M	0	0
Atp6v1h	-0.0580804	6.04364	0.933749	1	M	67.0592	64.4126
Atp7a	-0.0565991	2.9204	0.949201	1	M	7.48617	7.19762
Atp7b	-0.352631	3.67179	0.61767	1	M	14.0234	10.9794
Atp8a1	0.599724	2.62606	0.437178	1	M	4.74476	7.19762
Atp8a2	-2.55315	3.54463	0.000604987	0.0250546	M	19.4008	3.29383
Atp8b1	0.279085	1.35263	0.795106	1	M	2.10878	2.56186
Atp8b2	-1.40289	4.68071	0.0409626	0.572963	M	36.7982	13.9073
Atp8b3	-0.115276	10.7327	0.860122	1	M	1769.37	1633.49
Atp8b4	0.135528	1.28444	1	1	M	2.10878	2.31788
Atp8b5	-0.379981	6.62632	0.564607	1	M	111.449	85.6395
Atp9a	-0.77589	5.96145	0.24263	1	M	78.3412	45.7476
Atp9b	0.102709	6.99907	0.877157	1	M	123.153	132.241
Atpaf1	-0.217649	3.44936	0.771318	1	M	11.4929	9.88148
Atpaf2	-0.200036	4.98612	0.766139	1	M	33.635	29.2784
Atpif1	0.372857	6.48375	0.573614	1	M	77.814	100.767
Atr	-0.294668	8.86363	0.653032	1	M	512.961	418.194
Atraid	0.0329636	3.71483	0.970243	1	M	12.7581	13.0533
Atrip	0.341317	3.9326	0.62869	1	M	13.2853	16.8351
Atrn	-0.133217	4.46621	0.849507	1	M	22.8803	20.8609
Atrnl1	0.495535	3.24507	0.489778	1	M	7.69705	10.8574
Atrx	0.513687	3.40226	0.46027	1	M	8.54056	12.1994
Atxn1	-0.877642	1.51254	0.290499	1	M	3.37405	1.8299
Atxn10	0.511065	7.49663	0.437483	1	M	148.774	212.025
Atxn1l	0.0432079	6.27628	0.948699	1	M	76.127	78.4418
Atxn2	0.172127	6.85705	0.794878	1	M	108.813	122.603
Atxn2l	-0.12812	9.97888	0.844832	1	M	1053.65	964.115
Atxn3	0.537888	5.88297	0.418935	1	M	47.9747	69.6583
Atxn7	-0.382085	5.1445	0.568476	1	M	39.7505	30.4984
Atxn7l1	0.482679	6.28645	0.467435	1	M	64.9504	90.7632
Atxn7l1os2	2.07006	-0.967001	0.430642	1	M	0.105439	0.487974
Atxn7l2	0.101187	4.06362	0.883251	1	M	15.9213	17.0791
Atxn7l3	0.0337969	5.54001	0.961615	1	M	45.7605	46.8455
Atxn7l3b	-0.215201	9.23125	0.742521	1	M	645.498	556.047
AU015228	3.26724	-1.81972	1	1	M	0	0.121994
AU015791	5.12548e-15	-2.14415	1	1	M	0	0
AU015836	-1.26274	3.41398	0.0776955	0.861279	M	14.656	6.09968
AU016765	3.26724	-1.81972	1	1	M	0	0.121994
AU018091	-2.04948	-0.157511	0.137874	1	M	1.05439	0.243987
AU019823	-0.273443	4.3349	0.694747	1	M	21.8259	18.055
AU019990	5.12548e-15	-2.14415	1	1	M	0	0
AU021063	-1.06844	-0.689851	0.521739	1	M	0.527195	0.243987
AU021092	0.545672	3.76126	0.436173	1	M	10.8602	15.8592
AU022252	-0.0256387	3.49894	0.982875	1	M	11.1765	10.9794
AU022751	1.63738	0.118226	0.187026	1	M	0.421756	1.34193
AU022754	5.12548e-15	-2.14415	1	1	M	0	0
AU022793	-3.99226	-1.56342	0.52381	1	M	0.210878	0
AU023762	5.12548e-15	-2.14415	1	1	M	0	0
AU040320	-0.113706	6.65191	0.865888	1	M	104.279	96.3749
AU040972	5.12548e-15	-2.14415	1	1	M	0	0
AU041133	-1.54306	-0.452321	0.266667	1	M	0.738073	0.243987
Auh	0.0213123	2.65081	1	1	M	6.01002	6.09968
Aunip	0.378925	2.03418	0.651311	1	M	3.37405	4.39177
Aup1	0.119304	6.55008	0.85829	1	M	89.6232	97.3508
Aurka	0.269885	7.44438	0.681771	1	M	157.737	190.188
Aurkaip1	0.247959	5.83172	0.709613	1	M	51.876	61.6067
Aurkb	0.280541	4.04959	0.688266	1	M	14.7615	17.933
Aurkc	0.0363483	4.82861	0.958306	1	M	27.8359	28.5465
Auts2	-1.36991	2.34927	0.080032	0.873831	M	6.95897	2.68386
AV039307	-0.233827	3.71294	0.736709	1	M	13.9179	11.8334
AV051173	1.90761	3.4841	0.00840416	0.199454	M	4.63932	17.4451
AV064505	5.12548e-15	-2.14415	1	1	M	0	0
AV320801	1.83694	1.09184	0.0380057	0.554241	M	0.843512	3.04984
Aven	-0.110864	6.80901	0.867715	1	M	116.194	107.598
Avil	2.38384	-0.81288	0.282609	1	M	0.105439	0.609968
Avl9	-0.29279	3.45459	0.688562	1	M	11.8092	9.63749
Avp	3.26724	-1.81972	1	1	M	0	0.121994
Avpi1	0.882062	2.69863	0.232621	1	M	4.42844	8.17357
Avpr1a	3.8481	0.128975	0.00744743	0.180902	M	0.105439	1.70791
Avpr1b	5.12548e-15	-2.14415	1	1	M	0	0
Avpr2	5.12548e-15	-2.14415	1	1	M	0	0
AW011738	0.187059	-1.55886	1	1	M	0.105439	0.121994
AW046200	-0.274307	2.49291	0.735	1	M	5.90458	4.87974
AW112010	5.15024	-1.13474	0.161491	1	M	0	0.487974
AW146154	0.102533	0.811473	1	1	M	1.47615	1.58592
AW209491	-0.24304	3.64295	0.739126	1	M	13.2853	11.2234
AW495222	3.26724	-1.81972	1	1	M	0	0.121994
AW549542	0.187059	-1.55886	1	1	M	0.105439	0.121994
AW549877	-0.0240531	4.40196	0.981399	1	M	21.0878	20.7389
AW551984	5.12548e-15	-2.14415	1	1	M	0	0
AW554918	-0.315089	6.20459	0.635163	1	M	81.5044	65.5105
AW822252	-3.99226	-1.56342	0.52381	1	M	0.210878	0
Awat1	6.92828	0.0531056	0.00140897	0.0498823	M	0	1.70791
Awat2	1.5831	-0.226153	0.251568	1	M	0.316317	0.975948
Axdnd1	0.0666326	7.94935	0.919745	1	M	241.244	252.649
Axin1	-0.100935	5.70566	0.882417	1	M	53.7739	50.1393
Axin2	0.406937	2.13191	0.63273	1	M	3.58493	4.75775
Axl	-1.57709	4.75726	0.0216456	0.387187	M	40.0668	13.4193
AY074887	0.201995	-0.821308	1	1	M	0.316317	0.365981
AY358078	0.109914	0.901842	1	1	M	1.58159	1.70791
AY512915	5.12548e-15	-2.14415	1	1	M	0	0
AY512931	-1.32518	-0.566093	0.372947	1	M	0.632634	0.243987
AY702103	-0.240771	7.23852	0.714917	1	M	163.325	138.219
AY761184	5.12548e-15	-2.14415	1	1	M	0	0
AY761185	5.12548e-15	-2.14415	1	1	M	0	0
Aym1	-1.72928	1.25653	0.0611377	0.738245	M	3.26861	0.975948
Azgp1	-3.99226	-1.56342	0.52381	1	M	0.210878	0
Azi2	0.980507	6.23382	0.140515	1	M	50.5053	99.6687
Azin1	-0.230137	6.35555	0.730301	1	M	88.147	75.148
Azin2	-2.6085	4.69583	0.000292028	0.0138036	M	43.9681	7.19762
B2m	1.53851	4.62436	0.0250206	0.420139	M	12.5472	36.4761
B3galnt1	-0.111475	4.78877	0.871825	1	M	28.4685	26.3506
B3galnt2	-0.199087	4.15331	0.781543	1	M	18.7681	16.3471
B3galt1	0.46285	-0.233819	1	1	M	0.527195	0.731961
B3galt2	5.12548e-15	-2.14415	1	1	M	0	0
B3galt4	-0.579953	3.02994	0.421769	1	M	9.48951	6.34366
B3galt5	5.12548e-15	-2.14415	1	1	M	0	0
B3galt6	-0.203178	1.13798	0.84052	1	M	2.10878	1.8299
B3gat1	-3.99226	-1.56342	0.52381	1	M	0.210878	0
B3gat2	5.12548e-15	-2.14415	1	1	M	0	0
B3gat3	-0.0346675	3.35468	0.981029	1	M	10.1221	9.88148
B3glct	1.60396	0.574808	0.0967864	0.943625	M	0.632634	1.9519
B3gnt2	0.848884	1.36254	0.335401	1	M	1.68702	3.04984
B3gnt3	3.26724	-1.81972	1	1	M	0	0.121994
B3gnt4	-0.340711	4.02512	0.628323	1	M	17.9246	14.1512
B3gnt5	5.12548e-15	-2.14415	1	1	M	0	0
B3gnt6	5.12548e-15	-2.14415	1	1	M	0	0
B3gnt7	5.15024	-1.13474	0.161491	1	M	0	0.487974
B3gnt8	-1.34939	0.165806	0.23879	1	M	1.26527	0.487974
B3gnt9	0.79128	1.62601	0.37369	1	M	2.10878	3.65981
B3gntl1	0.388133	3.24202	0.607844	1	M	8.01336	10.4914
B4galnt1	-0.286453	4.97811	0.676304	1	M	34.3731	28.1805
B4galnt2	-0.518185	0.172806	0.700311	1	M	1.05439	0.731961
B4galnt3	-4.33926	0.775949	0.000621965	0.0255714	M	2.74141	0.121994
B4galnt4	-2.45626	0.915144	0.0126381	0.267044	M	2.74141	0.487974
B4galt1	1.21495	4.5631	0.0745169	0.83665	M	14.1288	32.8163
B4galt2	-0.324298	3.7767	0.640801	1	M	14.9723	11.9554
B4galt3	-1.08811	3.01736	0.131326	1	M	10.6493	5.00173
B4galt4	1.41279	0.456375	0.219277	1	M	0.632634	1.70791
B4galt5	0.101402	4.60066	0.894701	1	M	23.1966	24.8867
B4galt6	-1.69436	1.38394	0.0565605	0.703864	M	3.58493	1.09794
B4galt7	-0.999643	3.4204	0.153509	1	M	13.9179	6.95363
B4gat1	-0.716103	1.86359	0.403125	1	M	4.21756	2.56186
B9d1	0.641272	6.51228	0.331557	1	M	71.1713	111.014
B9d2	0.0947296	2.86963	0.895587	1	M	6.85354	7.31961
Baalc	0.603554	-0.681609	1	1	M	0.316317	0.487974
Baat	5.12548e-15	-2.14415	1	1	M	0	0
Babam1	0.194436	5.69391	0.772827	1	M	48.0802	55.0191
Babam2	0.633308	5.39314	0.344654	1	M	32.7915	50.8713
Bace1	1.94755	0.578006	0.078524	0.863084	M	0.527195	2.07389
Bace2	0.603554	-0.681609	1	1	M	0.316317	0.487974
Bach1	1.4076	1.43478	0.101443	0.962481	M	1.37071	3.65981
Bach2	2.60832	2.9366	0.000621674	0.0255714	M	2.10878	12.9313
Bach2os	6.29742	-0.424494	0.00922396	0.211407	M	0	1.09794
Bad	0.18451	5.841	0.780838	1	M	53.4576	60.7528
Bag1	-0.310404	7.11396	0.637723	1	M	153.097	123.457
Bag2	-0.734755	2.26532	0.342597	1	M	5.69371	3.41582
Bag3	0.266142	5.1503	0.695394	1	M	32.0535	38.55
Bag4	1.07306	5.38342	0.110347	1	M	26.7815	56.361
Bag5	-0.0951585	8.20667	0.885101	1	M	304.93	285.465
Bag6	0.0857295	9.79587	0.895892	1	M	862.28	915.073
Bahcc1	1.26933	3.40722	0.0750643	0.840306	M	6.11546	14.7612
Bahd1	-0.480162	4.37189	0.487049	1	M	23.8292	17.0791
Baiap2	0.108632	7.25795	0.869704	1	M	147.087	158.592
Baiap2l1	0.0333482	1.58441	1	1	M	2.74141	2.80585
Baiap2l2	0.756419	-0.971301	1	1	M	0.210878	0.365981
Baiap3	-0.184477	1.43746	0.865284	1	M	2.63598	2.31788
Bak1	-0.315345	3.80041	0.660241	1	M	15.1832	12.1994
Bambi	-0.0574706	3.63547	0.937352	1	M	12.4418	11.9554
Bambi-ps1	3.26724	-1.81972	1	1	M	0	0.121994
Banf1	0.174806	5.53431	0.796539	1	M	43.3354	48.9194
Bank1	2.48034	0.337915	0.0381992	0.554241	M	0.316317	1.8299
Banp	0.251912	3.58452	0.729874	1	M	10.7548	12.8093
Bap1	0.379414	7.07519	0.564838	1	M	117.037	152.248
Bard1	-0.438683	4.40782	0.520311	1	M	24.1455	17.8111
Barhl1	1.15798	-0.817097	0.726708	1	M	0.210878	0.487974
Barhl2	0.756419	-0.971301	1	1	M	0.210878	0.365981
Barx1	3.26724	-1.81972	1	1	M	0	0.121994
Barx2	-3.08018	-1.82439	1	1	M	0.105439	0
Basp1	-1.25337	3.0234	0.0839354	0.892867	M	11.0711	4.63575
Batf	3.26724	-1.81972	1	1	M	0	0.121994
Batf2	0.756419	-0.971301	1	1	M	0.210878	0.365981
Batf3	5.7216	-0.808655	0.0565217	0.703864	M	0	0.731961
Bax	0.124359	2.57325	0.873012	1	M	5.48283	5.97768
Baz1a	-0.517917	8.07171	0.430679	1	M	316.528	221.052
Baz1b	0.17745	5.32546	0.794543	1	M	37.4308	42.3318
Baz2a	-0.550814	8.90925	0.401432	1	M	571.163	389.891
Baz2b	-0.384609	6.20001	0.560153	1	M	82.9805	63.5586
BB014433	0.90567	6.55618	0.172059	1	M	65.3722	122.482
BB019430	1.40179	2.26225	0.0664226	0.777837	M	2.53054	6.70964
BB031773	3.26724	-1.81972	1	1	M	0	0.121994
BB123696	0.917334	-0.553965	0.769726	1	M	0.316317	0.609968
BB218582	-1.99151	-0.829706	0.282609	1	M	0.527195	0.121994
BB283400	5.12548e-15	-2.14415	1	1	M	0	0
BB287469	-3.99226	-1.56342	0.52381	1	M	0.210878	0
BB557941	-0.556298	2.11029	0.477755	1	M	4.85019	3.29383
Bbc3	1.46116	1.12601	0.0946183	0.932889	M	1.05439	2.92784
Bbip1	0.157307	6.33105	0.813645	1	M	75.9161	84.6635
Bbof1	0.206029	8.0435	0.753812	1	M	244.829	282.415
Bbox1	-1.35435	0.426778	0.183672	1	M	1.58159	0.609968
Bbs1	-0.516742	6.05599	0.436728	1	M	78.0249	54.5311
Bbs10	-0.131607	4.20037	0.861762	1	M	18.979	17.3231
Bbs12	2.29018	2.675	0.00268673	0.0843722	M	2.10878	10.3695
Bbs2	-0.205357	5.96243	0.758179	1	M	66.532	57.7029
Bbs4	0.166596	4.91673	0.80564	1	M	28.2577	31.7183
Bbs5	-0.22304	4.53855	0.749133	1	M	24.7782	21.2269
Bbs7	0.538855	6.49506	0.415379	1	M	73.3855	106.622
Bbs9	-0.308009	6.14888	0.641858	1	M	78.2357	63.1926
Bbx	-2.19795	5.59737	0.00155498	0.0541408	M	78.9738	17.2011
BC002163	1.6685	-1.13913	0.658385	1	M	0.105439	0.365981
BC003331	0.18277	4.17911	0.796603	1	M	16.7648	19.031
BC003965	0.254986	2.90717	0.749762	1	M	6.64266	7.92958
BC004004	0.427871	4.47344	0.524763	1	M	18.7681	25.2527
BC005537	-0.322871	7.09647	0.624288	1	M	151.832	121.384
BC005561	0.0375326	4.32874	0.970629	1	M	19.6117	20.1289
BC005624	0.226572	5.3434	0.736141	1	M	37.22	43.5517
BC006965	-3.99226	-1.56342	0.52381	1	M	0.210878	0
BC016548	5.12548e-15	-2.14415	1	1	M	0	0
BC016579	-0.725021	-1.33855	1	1	M	0.210878	0.121994
BC017158	-0.0031956	3.54924	1	1	M	11.4929	11.4674
BC017643	-0.420815	2.57323	0.574438	1	M	6.53722	4.87974
BC018473	5.12548e-15	-2.14415	1	1	M	0	0
BC020402	0.569962	1.56715	0.483994	1	M	2.21422	3.29383
BC021767	0.289561	2.11035	0.747485	1	M	3.69037	4.51376
BC022687	0.36102	5.38394	0.591254	1	M	36.3765	46.7235
BC024139	-0.197527	-0.685733	1	1	M	0.421756	0.365981
BC024386	-3.08018	-1.82439	1	1	M	0.105439	0
BC024978	-0.811183	3.44012	0.25375	1	M	13.4962	7.68559
BC025920	-0.0884001	0.898958	1	1	M	1.68702	1.58592
BC027072	-0.545728	3.73429	0.437553	1	M	15.4995	10.6134
BC028528	-0.197527	-0.685733	1	1	M	0.421756	0.365981
BC029722	-0.428798	2.35343	0.609731	1	M	5.58827	4.14778
BC030336	0.46102	3.94169	0.500303	1	M	12.7581	17.5671
BC030499	1.15798	-0.817097	0.726708	1	M	0.210878	0.487974
BC030500	5.12548e-15	-2.14415	1	1	M	0	0
BC030867	0.195413	5.05476	0.770809	1	M	30.7882	35.2561
BC030870	5.12548e-15	-2.14415	1	1	M	0	0
BC031181	-0.0940255	4.54276	0.898815	1	M	23.8292	22.3248
BC031361	0.917334	-0.553965	0.769726	1	M	0.316317	0.609968
BC035044	5.12548e-15	-2.14415	1	1	M	0	0
BC037032	5.12548e-15	-2.14415	1	1	M	0	0
BC037034	-0.164044	6.08492	0.808394	1	M	71.4876	63.8026
BC037156	5.12548e-15	-2.14415	1	1	M	0	0
BC037704	0.229635	3.1007	0.757734	1	M	7.69705	9.02752
BC039771	0.187059	-1.55886	1	1	M	0.105439	0.121994
BC039966	-0.287753	2.6939	0.73926	1	M	6.85354	5.6117
BC042761	5.12548e-15	-2.14415	1	1	M	0	0
BC046251	-5.73337	-0.698067	0.0347826	0.520617	M	0.738073	0
BC048403	0.838407	1.6535	0.342553	1	M	2.10878	3.7818
BC048502	1.16186	5.38614	0.0847129	0.893197	M	25.7271	57.5809
BC048602	-4.54668	-1.34301	0.285714	1	M	0.316317	0
BC048644	-0.16757	4.95089	0.809799	1	M	32.4752	28.9125
BC048671	0.593467	5.07304	0.376197	1	M	26.6761	40.2579
BC048679	5.12548e-15	-2.14415	1	1	M	0	0
BC049715	0.0877344	4.8867	0.900113	1	M	28.4685	30.2544
BC049730	-0.511458	7.00594	0.438115	1	M	150.778	105.768
BC051019	4.67938	0.80174	0.000305695	0.0143898	M	0.105439	3.04984
BC051142	-0.0259334	9.22845	0.968703	1	M	605.009	594.23
BC051226	-0.201021	0.0239923	1	1	M	0.843512	0.731961
BC051537	5.12548e-15	-2.14415	1	1	M	0	0
BC051665	5.12548e-15	-2.14415	1	1	M	0	0
BC052040	-0.204116	2.52317	0.803434	1	M	5.90458	5.12373
BC052688	0.00391015	0.855902	1	1	M	1.58159	1.58592
BC053393	5.12548e-15	-2.14415	1	1	M	0	0
BC055324	0.581175	3.86246	0.396412	1	M	11.4929	17.2011
BC055402	-3.99226	-1.56342	0.52381	1	M	0.210878	0
BC061195	5.12548e-15	-2.14415	1	1	M	0	0
BC061212	5.12548e-15	-2.14415	1	1	M	0	0
BC061237	2.12372	5.15967	0.0022659	0.0733868	M	13.2853	57.9469
BC064078	-3.08018	-1.82439	1	1	M	0.105439	0
BC065397	1.33626	1.04563	0.127301	1	M	1.05439	2.68386
BC080695	5.12548e-15	-2.14415	1	1	M	0	0
Bc1	-0.197527	-0.685733	1	1	M	0.421756	0.365981
BC100530	5.12548e-15	-2.14415	1	1	M	0	0
BC106179	-1.67897	-0.979877	0.430642	1	M	0.421756	0.121994
BC107364	-0.56592	2.72397	0.442156	1	M	7.59161	5.12373
BC117090	5.12548e-15	-2.14415	1	1	M	0	0
BC147527	-3.08018	-1.82439	1	1	M	0.105439	0
Bcam	0.265678	1.64243	0.768941	1	M	2.63598	3.17183
Bcan	2.07006	-0.967001	0.430642	1	M	0.105439	0.487974
Bcap29	0.299464	7.70622	0.648713	1	M	187.049	230.202
Bcap31	0.837459	3.71389	0.233421	1	M	9.27863	16.5911
Bcar1	-0.037776	5.18772	0.956576	1	M	36.6928	35.7441
Bcar3	-0.0881633	3.67972	0.924091	1	M	12.969	12.1994
Bcas1	0.274861	3.37168	0.707604	1	M	9.17319	11.1014
Bcas1os2	-0.172115	1.68532	0.8871	1	M	3.16317	2.80585
Bcas2	0.189842	5.81229	0.776548	1	M	52.2977	59.6548
Bcas3	-0.0478982	5.25509	0.948129	1	M	38.5907	37.33
Bcas3os1	5.12548e-15	-2.14415	1	1	M	0	0
Bcas3os2	1.11012	-1.33407	1	1	M	0.105439	0.243987
Bcat1	5.7216	-0.808655	0.0565217	0.703864	M	0	0.731961
Bcat2	-0.444964	4.75711	0.512916	1	M	30.8936	22.6908
Bccip	0.42084	3.75748	0.548111	1	M	11.3874	15.2492
Bcdin3d	-0.0812124	2.90893	0.923308	1	M	7.48617	7.07562
Bche	0.78193	0.111075	0.580436	1	M	0.632634	1.09794
Bckdha	-0.0829194	5.91635	0.901518	1	M	61.8927	58.4349
Bckdhb	0.301078	0.9897	0.824298	1	M	1.58159	1.9519
Bckdk	-0.401387	2.33817	0.639255	1	M	5.48283	4.14778
Bcl10	1.09363	2.49707	0.147617	1	M	3.47949	7.44161
Bcl11a	-0.748481	3.21021	0.288039	1	M	11.282	6.70964
Bcl11b	2.07006	-0.967001	0.430642	1	M	0.105439	0.487974
Bcl2	0.603554	-0.681609	1	1	M	0.316317	0.487974
Bcl2a1a	0.187059	-1.55886	1	1	M	0.105439	0.121994
Bcl2a1b	5.12548e-15	-2.14415	1	1	M	0	0
Bcl2a1c	5.12548e-15	-2.14415	1	1	M	0	0
Bcl2a1d	5.12548e-15	-2.14415	1	1	M	0	0
Bcl2l1	0.0427822	6.9672	0.949594	1	M	123.047	126.751
Bcl2l10	5.12548e-15	-2.14415	1	1	M	0	0
Bcl2l11	-0.5118	1.86761	0.564607	1	M	4.00668	2.80585
Bcl2l12	-0.45763	6.52636	0.488895	1	M	106.388	77.4659
Bcl2l13	0.132949	5.48065	0.845552	1	M	42.3865	46.4795
Bcl2l14	0.842993	7.00696	0.203221	1	M	91.9428	164.935
Bcl2l15	0.619814	0.864676	0.545468	1	M	1.26527	1.9519
Bcl2l2	-1.07627	3.89574	0.121809	1	M	19.8225	9.3935
Bcl3	1.68696	1.819	0.0404521	0.567728	M	1.58159	5.12373
Bcl6	0.680292	1.42269	0.450687	1	M	1.8979	3.04984
Bcl6b	2.10179	2.65849	0.00557037	0.147265	M	2.31966	10.0035
Bcl7a	-1.08954	0.0167486	0.390133	1	M	1.05439	0.487974
Bcl7b	-0.201232	5.82328	0.764792	1	M	60.3111	52.4572
Bcl7c	0.16496	5.1834	0.805709	1	M	34.0568	38.184
Bcl9	-0.0213972	3.76808	0.985664	1	M	13.4962	13.2973
Bcl9l	-0.422744	3.09209	0.549518	1	M	9.48951	7.07562
Bclaf1	-0.0828508	6.65946	0.90174	1	M	103.752	97.9608
Bclaf3	1.58035	1.74379	0.0552156	0.703864	M	1.58159	4.75775
Bco1	0.49413	3.33779	0.482977	1	M	8.22424	11.5894
Bco2	-0.062328	1.6875	1	1	M	3.05773	2.92784
Bcor	-0.592275	1.05628	0.524474	1	M	2.21422	1.46392
Bcorl1	2.16826	4.413	0.00224752	0.073104	M	7.69705	34.6462
Bcr	0.326249	4.5176	0.635265	1	M	20.1389	25.2527
Bcs1l	-0.101158	1.96218	0.951983	1	M	3.7958	3.53781
Bdh1	-0.0388796	2.76171	0.971953	1	M	6.64266	6.46566
Bdh2	1.6685	-1.13913	0.658385	1	M	0.105439	0.365981
Bdkrb1	-1.06844	-0.689851	0.521739	1	M	0.527195	0.243987
Bdkrb2	-0.0117701	-0.0567904	1	1	M	0.738073	0.731961
Bdnf	3.26724	-1.81972	1	1	M	0	0.121994
[truncated: 20,737 more rows]

## Sheet: Fig 1B
symbol	logFC	logCPM	PValue	FDR	state	rs_wt.cpm	rs_ko.cpm
Abhd16b	-6.63566	3.69897	8.91378e-11	7.21223e-09	D	25.172	0.238761
Ace3	-13.0363	5.93897	3.58856e-19	1.53293e-16	D	122.118	0
Acot10	-11.0139	3.93617	2.97124e-13	3.71176e-11	D	30.0477	0
Acot9	-3.7476	4.39531	1.37449e-06	5.84119e-05	D	38.6652	2.86514
Acrv1	-2.83995	6.87305	5.63519e-05	0.00164681	D	205.231	28.6514
Acsbg2	-7.6099	7.15324	5.2048e-17	1.23267e-14	D	282.675	1.43257
Acsl1	-5.09763	8.1416	7.27172e-11	6.03394e-09	D	548.229	15.997
Actg2	-7.56757	6.53489	2.50535e-16	5.32352e-14	D	183.915	0.955046
Actl10	-7.6372	3.77242	9.3355e-12	9.14879e-10	D	26.6461	0.119381
Actl11	-3.40364	7.635	2.38067e-06	9.70017e-05	D	362.727	34.2623
Actl7a	-4.26125	7.50995	1.469e-08	8.85957e-07	D	345.945	18.0265
Actrt1	-4.75023	3.13658	1.35136e-07	6.93554e-06	D	16.4412	0.596904
Actrt2	-14.4572	7.35576	2.06733e-23	5.22255e-20	D	327.01	0
Actrt3	-7.5745	3.71124	1.41531e-11	1.32969e-09	D	25.5122	0.119381
Adam1a	-13.4473	6.34831	2.151e-20	1.68638e-17	D	162.371	0
Adam24	-2.5312	6.35868	0.000287949	0.00677023	D	139.467	24.1149
Adam29	-8.53511	4.6541	2.51481e-14	3.78653e-12	D	49.6637	0.119381
Adam4	-7.95036	4.07881	1.19479e-12	1.33161e-10	D	33.1092	0.119381
Adam6a	-2.82853	4.89842	9.52101e-05	0.00259245	D	51.8181	7.28223
Adam6b	-3.77629	4.29842	1.32713e-06	5.66108e-05	D	36.1706	2.62638
Adat2	-3.00358	3.1593	0.000107567	0.00287723	D	15.4207	1.91009
Adcy10	-5.22744	7.59554	3.5929e-11	3.17853e-09	D	376.22	10.028
Adig	-10.1445	3.08724	8.12454e-11	6.64459e-09	D	16.4412	0
Adtrp	-5.2411	3.29482	1.68335e-08	1.00718e-06	D	18.5956	0.477523
Afap1	-3.01888	4.69329	3.69117e-05	0.00113103	D	45.5818	5.6109
Agpat2	-4.30246	4.91258	4.93236e-08	2.81058e-06	D	56.8072	2.86514
AI507597	-13.3144	6.21592	5.35673e-20	3.71511e-17	D	148.084	0
Aif1	-5.49069	7.13475	8.56373e-12	8.46544e-10	D	274.398	6.08842
Akap1	-7.4475	8.20436	3.54987e-17	8.7728e-15	D	585.987	3.34266
Akap3	-3.90666	8.94018	1.07535e-07	5.65953e-06	D	920.48	61.3617
Akap4	-6.04827	9.25328	1.20883e-13	1.60725e-11	D	1201.79	18.1459
Aknad1	-6.66141	3.72397	7.52546e-11	6.22178e-09	D	25.6256	0.238761
Alkbh3os1	-6.10203	2.29924	1.18458e-07	6.14898e-06	D	9.18439	0.119381
Allc	-14.6068	7.50506	7.36975e-24	2.9371e-20	D	362.727	0
Amph	-3.23028	2.56206	9.90564e-05	0.00268432	D	10.2049	1.07443
Ank2	-5.37097	6.66926	2.48232e-11	2.25752e-09	D	198.201	4.77523
Ankrd53	-7.43085	5.02733	5.02565e-14	7.05328e-12	D	64.2907	0.358142
Ankrd9	-6.294	4.61855	8.1644e-12	8.10593e-10	D	47.9629	0.596904
Antxrl	-10.2195	6.32508	2.77239e-19	1.28639e-16	D	159.65	0.119381
Aox3	-3.92219	4.36727	6.05291e-07	2.79713e-05	D	38.2116	2.507
Apol7b	-9.50447	2.47126	3.93956e-09	2.58126e-07	D	10.545	0
Aqp7	-7.45773	6.23707	8.60867e-16	1.6587e-13	D	149.445	0.835665
Arhgef2	-5.33365	7.47721	2.02203e-11	1.86882e-09	D	347.193	8.59541
Arl9	-3.62899	4.0977	3.36482e-06	0.000134215	D	31.1816	2.507
Arrdc5	-6.42927	5.86169	1.98495e-13	2.56419e-11	D	114.408	1.31319
Asb15	-11.2539	4.17233	6.05102e-14	8.38878e-12	D	35.4903	0
Asb17	-12.8568	5.76037	1.22512e-18	4.56628e-16	D	107.832	0
Asb9	-8.55798	4.67667	2.15015e-14	3.34834e-12	D	50.4575	0.119381
Atad1	-2.83298	5.66565	7.2475e-05	0.00205204	D	88.5557	12.4156
Atcayos	-7.82767	0.926029	3.56805e-05	0.00110072	D	3.28824	0
Atl3	-4.33384	6.88167	1.16658e-08	7.14914e-07	D	224.167	11.1024
Atp1a4	-7.99428	7.94613	1.80223e-18	6.11575e-16	D	490.741	1.91009
Atp8a2	-4.20084	4.9845	7.50765e-08	4.11311e-06	D	59.5285	3.22328
AY702102	-11.0301	3.95212	2.66306e-13	3.36375e-11	D	30.3879	0
Azin2	-4.26444	6.03535	2.22093e-08	1.30816e-06	D	124.159	6.44656
B4galnt3	-5.23901	2.90372	6.10799e-08	3.41207e-06	D	14.0601	0.358142
B4galnt4	-4.54441	1.73554	1.70996e-05	0.000578537	D	5.89615	0.238761
Banf2	-10.797	3.72341	1.22566e-12	1.35935e-10	D	25.8524	0
Bbx	-4.51465	7.05407	3.72102e-09	2.45221e-07	D	254.101	11.1024
BC048507	-6.85928	3.01857	1.24951e-09	8.87777e-08	D	15.5341	0.119381
BC048562	-7.85861	3.9889	2.21194e-12	2.38344e-10	D	31.0682	0.119381
BC049762	-4.28652	6.36571	1.83088e-08	1.08971e-06	D	156.361	7.99851
Best1	-2.46217	7.1552	0.000387111	0.00868279	D	240.835	43.6934
Bpifa3	-11.4233	4.33927	1.96671e-14	3.10522e-12	D	39.9124	0
Bpifa6	-7.92348	1.01033	2.24824e-05	0.000731272	D	3.51501	0
Bri3	-3.37577	4.41973	8.02592e-06	0.000296229	D	38.5518	3.7008
Brinp3	-4.27098	1.49407	6.80293e-05	0.001948	D	4.87566	0.238761
Btbd35f28	-7.72505	0.836448	5.79138e-05	0.00168595	D	3.06146	0
Btg1-ps2	-8.36004	1.40188	2.45054e-06	9.93145e-05	D	4.76228	0
Cabs1	-14.2808	7.17965	6.9881e-23	1.32401e-19	D	289.365	0
Cacng5	-5.25059	2.91463	5.69228e-08	3.2114e-06	D	14.1734	0.358142
Cacul1	-2.59522	6.37725	0.000210272	0.0052363	D	142.188	23.518
Calr3	-6.44247	5.23533	7.90276e-13	9.1672e-11	D	73.9287	0.835665
Camk4	-5.28051	4.74075	3.73019e-10	2.79508e-08	D	51.5913	1.31319
Camsap3	-4.49902	2.60059	1.26737e-06	5.41635e-05	D	11.112	0.477523
Capza3	-13.31	6.21151	5.52604e-20	3.71511e-17	D	147.631	0
Car2	-7.31314	5.30909	2.55876e-14	3.82736e-12	D	78.2374	0.477523
Carhsp1	-2.5418	5.9209	0.000293735	0.00684959	D	102.956	17.6684
Carlr	-10.1245	3.06784	9.2478e-11	7.42961e-09	D	16.2144	0
Casq1	-5.10283	3.16387	3.9733e-08	2.29865e-06	D	16.8947	0.477523
Cast	-4.59228	7.507	1.90752e-09	1.29297e-07	D	348.78	14.4451
Catsper1	-7.38569	6.67123	4.10972e-16	8.34274e-14	D	202.057	1.19381
Catsper3	-9.46575	5.57556	4.73459e-17	1.14517e-14	D	94.6786	0.119381
Catsper4	-6.29643	6.26442	1.85443e-13	2.42312e-11	D	151.259	1.91009
Cavin4	-4.67294	1.01132	0.000195424	0.00491499	D	3.40163	0.119381
Ccdc116	-3.02322	7.37503	2.02981e-05	0.000671758	D	295.148	36.2917
Ccdc159	-5.4647	4.28292	4.66289e-10	3.46456e-08	D	37.5313	0.835665
Ccdc169	-3.35868	5.48214	4.8666e-06	0.000187856	D	80.9587	7.87913
Ccdc182	-10.877	3.80179	7.17702e-13	8.36803e-11	D	27.3264	0
Ccdc183	-9.17292	6.75513	3.68731e-19	1.53293e-16	D	215.096	0.358142
Ccdc185	-7.76396	6.06681	4.34802e-16	8.67163e-14	D	132.89	0.596904
Ccdc187	-12.7948	5.69871	1.8703e-18	6.25341e-16	D	103.296	0
Ccdc27	-13.157	6.05915	1.58007e-19	8.35451e-17	D	132.777	0
Ccdc34os	-9.75941	2.71546	8.83477e-10	6.38709e-08	D	12.586	0
Ccdc54	-10.0048	7.02816	1.30067e-20	1.09526e-17	D	260.224	0.238761
Ccdc63	-7.02842	7.37614	1.08779e-15	2.04396e-13	D	329.164	2.507
Ccdc91	-5.11214	7.30124	8.44558e-11	6.85781e-09	D	306.033	8.83418
Ccin	-13.2512	6.15295	8.28904e-20	4.8323e-17	D	141.734	0
Ccsap	-7.47388	4.51807	3.71124e-13	4.51223e-11	D	45.0149	0.238761
Cct8l1	-12.0162	4.92563	3.65787e-16	7.49238e-14	D	60.2088	0
Cd109	-2.98044	3.64721	9.9811e-05	0.00269834	D	21.7704	2.74576
Cd160	-5.05004	1.33908	3.23096e-05	0.00100354	D	4.42211	0.119381
Cd96	-3.01446	2.77018	0.000172679	0.00439646	D	11.6789	1.43257
Cdc14a	-3.3488	6.25697	3.96023e-06	0.000155778	D	138.786	13.6094
Cdc14b	-3.4807	5.40816	2.67626e-06	0.000107504	D	77.4437	6.92408
Cdh12	-4.52162	0.88297	0.000385253	0.00866381	D	3.06146	0.119381
Cdh23	-3.68527	5.23291	8.81479e-07	3.92601e-05	D	69.2798	5.37213
Cdrt4	-3.9274	5.91633	1.788e-07	8.97395e-06	D	112.821	7.40161
Cdrt4os1	-7.92348	1.01033	2.24824e-05	0.000731272	D	3.51501	0
Cdyl	-5.94205	6.55406	1.15905e-12	1.29896e-10	D	184.368	2.98452
Ceacam2	-3.11378	4.6833	2.33398e-05	0.000752702	D	45.5818	5.25275
Cemip	-4.56518	4.17939	2.7522e-08	1.60036e-06	D	34.243	1.43257
Cep85l	-3.25616	6.56744	6.22626e-06	0.000232829	D	171.215	17.9071
Cfap100	-12.8059	5.70969	1.73124e-18	5.96384e-16	D	104.09	0
Cfhr1	-5.76279	1.98359	8.42045e-07	3.78355e-05	D	7.2568	0.119381
Chd5	-4.87777	8.25432	2.69974e-10	2.08072e-08	D	590.069	20.056
Chl1	-5.1704	8.10062	4.41238e-11	3.78566e-09	D	533.602	14.8032
Chrna5	-4.97162	2.65318	3.04815e-07	1.47139e-05	D	11.6789	0.358142
Cldn34c1	-4.33052	2.06566	1.05608e-05	0.000381733	D	7.48358	0.358142
Cldn34c4	-9.4889	2.45639	4.33351e-09	2.80703e-07	D	10.4317	0
Cldn34d	-9.4889	2.45639	4.33351e-09	2.80703e-07	D	10.4317	0
Clip1	-4.07411	7.04951	4.93232e-08	2.81058e-06	D	249.566	14.8032
Clmn	-10.7996	6.90317	5.14727e-21	5.31947e-18	D	238.681	0.119381
Clpb	-2.51396	8.24406	0.000283703	0.00668423	D	515.573	90.2518
Cmklr1	-2.95673	5.07909	4.60746e-05	0.00137114	D	59.4151	7.64037
Cnbd2	-3.95806	6.36355	1.18138e-07	6.14898e-06	D	154.207	9.9086
Cngb3	-5.22734	2.89273	6.55733e-08	3.62743e-06	D	13.9467	0.358142
Cntn1	-8.09788	1.16537	9.4751e-06	0.000344682	D	3.96856	0
Cntn5	-7.67086	0.789463	7.44607e-05	0.00209782	D	2.94808	0
Cntnap5b	-7.49909	4.54285	3.12705e-13	3.88506e-11	D	45.8086	0.238761
Col26a1	-4.01547	1.27336	0.000230561	0.00560645	D	4.08195	0.238761
Col9a3	-6.46212	2.63908	1.48786e-08	8.94921e-07	D	11.7923	0.119381
Cpa5	-8.64314	5.67345	1.44888e-16	3.22958e-14	D	101.255	0.238761
Cpa6	-8.61088	1.63162	6.35441e-07	2.92457e-05	D	5.66938	0
Cpeb3	-4.33521	4.81975	4.6874e-08	2.69804e-06	D	53.2921	2.62638
Cpsf4l	-4.37146	4.48818	6.2176e-08	3.46479e-06	D	42.2936	2.02947
Cpxcr1	-7.41903	3.55983	3.77613e-11	3.30208e-09	D	22.9043	0.119381
Creb3l4	-5.2779	7.27588	3.19048e-11	2.83354e-09	D	301.611	7.75975
Csmd3	-7.49491	0.638481	0.000164799	0.00420524	D	2.60791	0
Csnk1g2	-2.75131	8.05387	8.38169e-05	0.00232115	D	462.281	68.6439
Csnka2ip	-9.30305	6.32921	1.60671e-18	5.70785e-16	D	159.99	0.238761
Csrnp3	-10.1934	3.13464	5.9198e-11	4.96651e-09	D	17.0081	0
Cst13	-10.9919	3.91462	3.44483e-13	4.25661e-11	D	29.5941	0
Cst8	-9.59931	5.70821	1.90798e-17	4.92953e-15	D	103.863	0.119381
Cstl1	-7.06485	3.21658	3.58472e-10	2.69875e-08	D	17.9152	0.119381
Ctag2	-4.6386	4.36179	1.4423e-08	8.74456e-07	D	39.0053	1.55195
Ctnna2	-3.02081	2.88609	0.000142939	0.00371412	D	12.6994	1.55195
Cxxc5	-5.88385	5.76753	3.36384e-12	3.50827e-10	D	106.584	1.79071
Cylc1	-12.0774	4.98624	2.44008e-16	5.23374e-14	D	62.8167	0
Cylc2	-4.57997	6.51063	3.12447e-09	2.08322e-07	D	174.503	7.28223
Cyp2a12	-8.05622	1.12816	1.16786e-05	0.00041359	D	3.85518	0
Cyp4f39	-7.35662	4.4029	8.00895e-13	9.24323e-11	D	41.4998	0.238761
Cyp51	-3.32775	5.16714	5.95166e-06	0.000223665	D	64.8577	6.44656
Cypt12	-10.2459	6.35137	2.30289e-19	1.11401e-16	D	162.598	0.119381
Cypt15	-4.89446	1.20258	6.91332e-05	0.00196969	D	3.96856	0.119381
Cypt2	-4.85301	3.88371	1.40147e-08	8.54256e-07	D	28.0067	0.955046
Cypt3	-8.39336	4.51432	6.47384e-14	8.86682e-12	D	45.0149	0.119381
Cytl1	-3.9726	2.12399	2.3311e-05	0.000752702	D	7.71035	0.477523
Dapl1	-5.25586	1.52218	1.13841e-05	0.000406326	D	5.10244	0.119381
Dcun1d1	-2.57287	7.13471	0.00022199	0.00545052	D	240.155	40.3507
Dcun1d4	-2.61233	6.05665	0.000200476	0.00500962	D	113.954	18.6234
Ddo	-5.93239	2.14079	3.18927e-07	1.52977e-05	D	8.1639	0.119381
Defb33	-8.8491	1.85252	1.6842e-07	8.47169e-06	D	6.68987	0
Dgat2	-3.18042	7.06309	8.86998e-06	0.000324225	D	240.382	26.5025
Dgcr2	-2.48642	6.27737	0.000363795	0.00824649	D	131.189	23.3986
Dgkh	-4.07541	6.42085	5.91338e-08	3.31149e-06	D	161.237	9.55046
Dlx6	-8.5818	1.60484	7.45e-07	3.35958e-05	D	5.55599	0
Dmrta2	-3.53852	2.48976	3.79855e-05	0.00115769	D	9.86472	0.835665
Dnajb7	-12.3168	5.22367	4.7929e-17	1.14707e-14	D	74.1555	0
Dnajb8	-13.7876	6.68758	2.08214e-21	2.49155e-18	D	205.572	0
Dnajc5b	-13.396	6.29722	3.06334e-20	2.24671e-17	D	156.702	0
Dnmt3l	-3.51784	3.09161	1.43005e-05	0.00049488	D	15.1939	1.31319
Dpp6	-3.35377	1.87867	0.000228285	0.00557496	D	6.23631	0.596904
Dpysl3	-5.2914	7.28902	2.92329e-11	2.60643e-09	D	304.446	7.75975
Dscaml1	-4.79759	1.96336	4.47145e-06	0.00017408	D	7.03003	0.238761
Dscc1	-3.18144	2.51976	0.000127118	0.00333737	D	9.86472	1.07443
Dsg1a	-12.0852	4.99396	2.31191e-16	5.00605e-14	D	63.1569	0
Dsg1b	-9.45723	2.4262	5.25811e-09	3.3581e-07	D	10.2049	0
Dusp21	-8.87329	1.87509	1.46828e-07	7.50176e-06	D	6.80325	0
Dusp3	-2.9895	4.40196	5.0813e-05	0.00149455	D	37.0777	4.65585
Dusp4	-4.55587	3.60298	8.61456e-08	4.6969e-06	D	22.7909	0.955046
Dydc2	-5.48425	3.1358	1.43754e-08	8.73901e-07	D	16.668	0.358142
Dyrk2	-2.67968	4.368	0.000222185	0.00545052	D	35.2635	5.49151
Dyrk4	-3.8755	3.94008	9.15158e-07	4.04806e-05	D	28.2335	1.91009
Eef1d	-3.69001	8.35865	4.11304e-07	1.94012e-05	D	608.778	47.1554
Efcab1	-3.84184	1.634	0.00011434	0.00303342	D	5.32921	0.358142
Efcab12	-4.67764	5.07879	6.02665e-09	3.82743e-07	D	64.5175	2.507
Eif4g1	-3.01241	7.44377	2.11728e-05	0.000699686	D	309.321	38.3212
Elovl6	-5.69999	2.80118	2.91593e-08	1.69124e-06	D	13.153	0.238761
Eno1b	-4.54779	2.94773	4.27773e-07	2.00947e-05	D	14.2868	0.596904
Epb41l2	-2.80788	7.2946	6.54197e-05	0.00188754	D	274.284	39.1569
Epb41l3	-2.5356	4.64725	0.000415235	0.00918365	D	42.2936	7.28223
Eqtn	-5.59941	5.8998	1.75521e-11	1.62887e-09	D	116.449	2.38761
Esyt3	-3.4757	2.61608	3.6872e-05	0.00113103	D	10.7718	0.955046
Etv2	-4.52162	0.88297	0.000385253	0.00866381	D	3.06146	0.119381
Eya4	-4.54947	4.65661	2.11667e-08	1.24999e-06	D	47.8495	2.02947
Fabp12	-4.4511	3.94949	6.6592e-08	3.67485e-06	D	29.0272	1.31319
Fam124b	-3.06061	2.41592	0.000233106	0.00565021	D	9.071	1.07443
Fam131b	-9.62337	2.58494	1.89581e-09	1.29051e-07	D	11.4521	0
Fam166a	-7.44318	6.41156	5.85333e-16	1.15723e-13	D	168.721	0.955046
Fam187b	-9.51649	6.54166	3.70827e-19	1.53293e-16	D	185.502	0.238761
Fam189a2	-4.41271	3.4689	2.07186e-07	1.03076e-05	D	20.6365	0.955046
Fam19a3	-4.99229	3.05966	7.35873e-08	4.04126e-06	D	15.6475	0.477523
Fam205a1	-6.76765	4.37575	4.09432e-12	4.23129e-10	D	40.5927	0.358142
Fam205c	-9.67356	7.25396	1.18395e-20	1.03532e-17	D	304.332	0.358142
Fam209	-7.98325	5.97219	2.78828e-16	5.816e-14	D	124.5	0.477523
Fam214b	-3.07797	3.95864	4.79233e-05	0.00141504	D	27.3264	3.22328
Fam220a	-4.53384	6.36916	4.46617e-09	2.88474e-07	D	157.949	6.8047
Fam229a	-8.30252	6.28909	3.17422e-17	8.01878e-15	D	155.341	0.477523
Fam24a	-3.08732	4.45126	3.13142e-05	0.000976623	D	38.6652	4.53647
Fam3b	-2.83429	3.5806	0.000200503	0.00500962	D	20.5231	2.86514
Fam71a	-6.74701	4.75191	1.12737e-12	1.27724e-10	D	52.8386	0.477523
Fam71b	-9.64121	5.74984	1.43926e-17	3.8956e-15	D	106.924	0.119381
Fam71d	-6.55831	7.27113	1.60535e-14	2.57037e-12	D	305.126	3.22328
Fam71e1	-5.66878	6.76844	4.15119e-12	4.27065e-10	D	213.282	4.17833
Fam71e2	-9.25833	7.81006	7.08034e-21	6.43915e-18	D	447.541	0.716284
Fam71f1	-5.36676	6.89659	2.12013e-11	1.95155e-09	D	232.104	5.6109
Fam71f2	-4.25519	7.0614	1.70281e-08	1.01614e-06	D	253.308	13.2513
Fam83e	-4.59388	5.6436	4.8477e-09	3.11349e-07	D	95.4723	3.93956
Far1os	-3.71856	1.90015	7.67128e-05	0.00215326	D	6.46309	0.477523
Fat3	-2.93507	3.54533	0.000130498	0.00341035	D	20.183	2.62638
Fbxo2	-4.59284	2.9896	3.27301e-07	1.56663e-05	D	14.7404	0.596904
Fbxo24	-3.04127	6.12443	2.1369e-05	0.000705147	D	123.933	15.042
Fbxo39	-11.3901	4.30656	2.46625e-14	3.73817e-12	D	39.0053	0
Fhl5	-12.9621	5.86512	5.98026e-19	2.34426e-16	D	115.995	0
Filip1	-4.94336	2.62687	3.31312e-07	1.5825e-05	D	11.4521	0.358142
Fndc11	-2.59645	6.94433	0.000200508	0.00500962	D	210.901	34.8592
Fndc8	-11.7418	4.65394	2.32981e-15	4.13832e-13	D	49.7771	0
Frat1	-2.93191	6.26847	3.78971e-05	0.00115769	D	135.838	17.7877
Fscb	-10.9761	7.07922	1.52859e-21	1.93078e-18	D	269.749	0.119381
Fscn3	-12.7853	5.68923	1.99931e-18	6.58788e-16	D	102.616	0
G6pd2	-11.3943	4.31069	2.39677e-14	3.65725e-12	D	39.1187	0
Galntl5	-14.1783	7.07738	1.41257e-22	2.29402e-19	D	269.522	0
Gapdhs	-8.59483	9.00037	2.1479e-20	1.68638e-17	D	1021.05	2.62638
Gata2	-3.00362	3.78483	7.75393e-05	0.00217378	D	24.0382	2.98452
Gck	-8.36004	1.40188	2.45054e-06	9.93145e-05	D	4.76228	0
Ggact	-3.62158	3.18468	8.48601e-06	0.000310689	D	16.3278	1.31319
Glb1l3	-3.68773	4.21714	2.24507e-06	9.19709e-05	D	34.0163	2.62638
Glp2r	-8.21611	1.27155	5.18875e-06	0.000196947	D	4.30873	0
Glrx2	-2.83815	4.8592	9.17033e-05	0.00250296	D	50.4575	7.04346
Glt6d1	-10.1245	3.06784	9.2478e-11	7.42961e-09	D	16.2144	0
Gm10046	-7.49491	0.638481	0.000164799	0.00420524	D	2.60791	0
Gm10538	-7.92348	1.01033	2.24824e-05	0.000731272	D	3.51501	0
Gm10578	-7.36442	0.528181	0.00021796	0.00538168	D	2.38114	0
Gm10731	-11.4597	4.37519	1.53375e-14	2.47315e-12	D	40.9329	0
Gm11149	-10.3395	3.2766	2.28818e-11	2.08932e-09	D	18.8223	0
Gm11213	-7.30005	3.44426	8.23339e-11	6.70948e-09	D	21.0901	0.119381
Gm11780	-13.1607	6.06283	1.53962e-19	8.3345e-17	D	133.117	0
Gm11978	-10.5716	3.50289	5.24635e-12	5.37301e-10	D	22.1106	0
Gm12440	-8.94354	1.94074	9.83586e-08	5.26344e-06	D	7.14342	0
Gm12530	-7.29447	0.469671	0.000290613	0.00679772	D	2.26775	0
Gm12911	-8.13838	1.20165	7.72046e-06	0.000285418	D	4.08195	0
Gm13547	-9.39174	2.36383	7.83154e-09	4.8917e-07	D	9.75133	0
Gm136	-4.25473	4.37837	1.28697e-07	6.65013e-06	D	39.0053	2.02947
Gm14151	-6.36272	4.37594	1.4003e-11	1.32105e-09	D	40.4794	0.477523
Gm14525	-5.57055	1.80702	2.14312e-06	8.79531e-05	D	6.3497	0.119381
Gm14725	-8.28987	1.3382	3.54078e-06	0.000139762	D	4.5355	0
Gm15104	-10.7779	3.7047	1.39258e-12	1.53698e-10	D	25.5122	0
Gm1527	-3.89218	3.66382	1.25392e-06	5.36894e-05	D	23.2444	1.55195
Gm15319	-8.94354	1.94074	9.83586e-08	5.26344e-06	D	7.14342	0
Gm15350	-4.59872	1.78409	1.28863e-05	0.000451141	D	6.12293	0.238761
Gm15412	-8.21611	1.27155	5.18875e-06	0.000196947	D	4.30873	0
Gm15509	-8.61088	1.63162	6.35441e-07	2.92457e-05	D	5.66938	0
Gm16445	-3.65923	2.14334	5.58629e-05	0.00163462	D	7.71035	0.596904
Gm17644	-2.88967	5.04244	6.55715e-05	0.0018893	D	57.6009	7.75975
Gm19395	-9.69299	2.65168	1.34054e-09	9.43063e-08	D	12.0191	0
Gm1993	-6.11971	2.31581	1.06732e-07	5.63467e-06	D	9.29778	0.119381
Gm19990	-7.82767	0.926029	3.56805e-05	0.00110072	D	3.28824	0
Gm2012	-6.55598	2.72836	8.33781e-09	5.19366e-07	D	12.586	0.119381
Gm20611	-10.5265	3.4589	7.06661e-12	7.04678e-10	D	21.4302	0
Gm20815	-4.22406	3.10914	8.82438e-07	3.92601e-05	D	15.8743	0.835665
Gm21119	-8.4909	1.52135	1.21973e-06	5.24229e-05	D	5.21583	0
Gm21283	-9.71992	2.67753	1.13224e-09	8.06977e-08	D	12.2459	0
Gm29508	-5.86172	3.4966	1.38769e-09	9.70003e-08	D	21.657	0.358142
Gm382	-9.7332	2.69028	1.04166e-09	7.47103e-08	D	12.3592	0
Gm4251	-7.77727	0.881939	4.53239e-05	0.00135057	D	3.17485	0
Gm4787	-9.70845	5.81667	9.08861e-18	2.55109e-15	D	112.027	0.119381
Gm4907	-10.4562	3.39029	1.06636e-11	1.01869e-09	D	20.4098	0
Gm5092	-7.17038	3.31859	1.81492e-10	1.41801e-08	D	19.2759	0.119381
Gm5169	-6.10203	2.29924	1.18458e-07	6.14898e-06	D	9.18439	0.119381
Gm527	-2.72941	4.24716	0.000187735	0.00474789	D	32.5422	4.89461
Gm5334	-10.3907	3.32643	1.63784e-11	1.53242e-09	D	19.5027	0
Gm5415	-3.4176	3.76527	1.28329e-05	0.000450956	D	24.3783	2.26823
Gm5460	-9.75941	2.71546	8.83477e-10	6.38709e-08	D	12.586	0
Gm5766	-8.28987	1.3382	3.54078e-06	0.000139762	D	4.5355	0
Gm5767	-7.40468	3.54588	4.14905e-11	3.60049e-09	D	22.6775	0.119381
Gm5893	-12.7644	5.66847	2.31376e-18	7.40926e-16	D	101.142	0
Gm5901	-11.3389	4.25607	3.39571e-14	4.88639e-12	D	37.6447	0
Gm5935	-8.05622	1.12816	1.16786e-05	0.00041359	D	3.85518	0
Gm5941	-6.89121	4.8935	4.31286e-13	5.2158e-11	D	58.3946	0.477523
Gm609	-4.62425	0.969806	0.000243817	0.00587849	D	3.28824	0.119381
Gm6093	-4.37921	3.04068	5.94281e-07	2.75185e-05	D	15.1939	0.716284
Gm6121	-9.07453	2.06368	5.21778e-08	2.95103e-06	D	7.82374	0
Gm614	-7.32312	3.46665	7.08047e-11	5.91844e-09	D	21.4302	0.119381
Gm6588	-5.48766	5.28306	5.35116e-11	4.5397e-09	D	75.6295	1.67133
Gm6760	-6.54602	4.15929	1.75525e-11	1.62887e-09	D	34.81	0.358142
Gm6812	-6.4056	2.58545	1.92741e-08	1.14416e-06	D	11.3388	0.119381
Gm7073	-10.2406	3.18052	4.35548e-11	3.75099e-09	D	17.5751	0
Gm7168	-8.4909	1.52135	1.21973e-06	5.24229e-05	D	5.21583	0
Gm732	-10.2683	3.20737	3.6391e-11	3.19454e-09	D	17.9152	0
Gm7788	-7.87637	0.968802	2.82471e-05	0.000894464	D	3.40163	0
Gm8096	-8.9205	1.91919	1.12212e-07	5.87846e-06	D	7.03003	0
Gm9	-5.69367	1.91989	1.09006e-06	4.75692e-05	D	6.91664	0.119381
Gm9047	-9.0535	2.04391	5.90433e-08	3.31149e-06	D	7.71035	0
Gm9839	-4.9306	2.08449	2.43143e-06	9.88925e-05	D	7.71035	0.238761
Gm9866	-7.36442	0.528181	0.00021796	0.00538168	D	2.38114	0
Gm9999	-9.61653	5.72531	1.69182e-17	4.42128e-15	D	105.11	0.119381
Gpat3	-7.79207	4.83136	4.42694e-14	6.29068e-12	D	56.1268	0.238761
Gpd2	-8.42621	7.96517	1.93578e-19	9.78044e-17	D	497.771	1.43257
Gpi1	-2.95374	7.44028	2.96641e-05	0.000930265	D	307.167	39.6344
Gpr153	-3.1581	2.6436	0.000112823	0.0030048	D	10.7718	1.19381
Gpr39	-4.89446	1.20258	6.91332e-05	0.00196969	D	3.96856	0.119381
Gpx6	-2.82506	3.31703	0.000268124	0.00635007	D	17.0081	2.38761
Grid1	-3.5009	1.71217	0.000222231	0.00545052	D	5.55599	0.477523
Grin3b	-8.9205	1.91919	1.12212e-07	5.87846e-06	D	7.03003	0
Grip1	-10.2337	6.33929	2.50772e-19	1.18782e-16	D	161.237	0.119381
Grip1os1	-9.53513	2.50053	3.26459e-09	2.16395e-07	D	10.7718	0
Grm1	-3.81233	2.91681	6.28936e-06	0.000234418	D	13.6065	0.955046
Gsg1	-3.59862	9.31285	6.77052e-07	3.10352e-05	D	1174.47	96.9372
Gstt4	-2.88831	7.04718	4.33695e-05	0.00130086	D	232.558	31.3971
Gtsf1l	-8.57038	7.12463	8.00805e-19	3.08595e-16	D	277.799	0.716284
H1fnt	-11.5781	7.67999	2.41806e-23	5.49771e-20	D	409.442	0.119381
H2-M5	-4.13055	1.37214	0.00013422	0.00349555	D	4.42211	0.238761
H2afb1	-11.7018	4.61441	3.06709e-15	5.36411e-13	D	48.4165	0
H2al1b	-7.55597	0.690598	0.000125561	0.0033003	D	2.7213	0
H2al1k	-7.61456	0.740884	9.63608e-05	0.00261439	D	2.83469	0
H2al1m	-4.36799	1.57916	4.20337e-05	0.00126748	D	5.21583	0.238761
H2al1n	-6.25381	2.44193	4.81019e-08	2.75842e-06	D	10.2049	0.119381
H2al3	-10.0308	2.97713	1.57971e-10	1.2471e-08	D	15.1939	0
Habp4	-3.79925	6.58013	2.8833e-07	1.39775e-05	D	178.018	12.7737
Haglr	-6.50309	2.67802	1.15607e-08	7.10392e-07	D	12.1325	0.119381
Hdac11	-5.84866	5.52956	5.97615e-12	6.03883e-10	D	90.2565	1.55195
Heatr9	-7.82129	3.95236	2.8406e-12	3.0039e-10	D	30.2745	0.119381
Hemgn	-11.8826	4.79323	9.02836e-16	1.72495e-13	D	54.8796	0
Hils1	-14.4622	7.36074	1.99557e-23	5.22255e-20	D	328.144	0
Hist1h4a	-6.20497	2.39592	6.43807e-08	3.57015e-06	D	9.86472	0.119381
Hmgb1-rs17	-11.0193	3.9415	2.86436e-13	3.59802e-11	D	30.1611	0
Hmgb4	-13.7041	6.60428	3.68822e-21	4.19277e-18	D	194.006	0
Hmgb4os	-7.22095	0.408665	0.000390825	0.00873726	D	2.15436	0
Hs3st4	-5.6103	2.71643	5.04121e-08	2.86542e-06	D	12.3592	0.238761
Hsfy2	-12.7184	5.62272	3.15582e-18	9.31828e-16	D	97.9668	0
Hspa1l	-5.77158	7.86489	1.12916e-12	1.27724e-10	D	457.292	8.35665
Hyal5	-9.7445	5.85251	7.13427e-18	2.05322e-15	D	114.862	0.119381
Hypm	-11.4355	4.35134	1.80903e-14	2.87624e-12	D	40.2526	0
Iba57	-2.82938	3.094	0.000329308	0.00757809	D	14.5136	2.02947
Ica1	-6.72587	5.70249	7.43849e-14	1.0127e-11	D	102.616	0.955046
Ifi209	-3.51942	2.81611	2.31563e-05	0.000749974	D	12.4726	1.07443
Igsf3	-4.69432	3.54773	5.7242e-08	3.22142e-06	D	21.9972	0.835665
Il31	-3.47323	4.31182	5.50492e-06	0.0002086	D	35.9439	3.22328
Iqcf1	-12.0162	4.92563	3.65787e-16	7.49238e-14	D	60.2088	0
Iqcf3	-11.6191	7.72089	1.81945e-23	5.22255e-20	D	421.235	0.119381
Iqcf4	-12.7563	5.66041	2.42118e-18	7.64553e-16	D	100.575	0
Iqcf5	-6.99457	4.5981	9.29282e-13	1.06172e-10	D	47.5094	0.358142
Iqcf6	-5.99118	2.19557	2.26746e-07	1.11106e-05	D	8.50407	0.119381
Iqcm	-3.47069	5.62675	2.49655e-06	0.000100999	D	90.1431	8.11789
Irf6	-10.6921	3.6207	2.36042e-12	2.51956e-10	D	24.0382	0
Irgc1	-8.46096	8.73032	6.66152e-20	4.09341e-17	D	846.438	2.38761
Isg20	-5.59026	5.04079	5.05588e-11	4.32144e-09	D	63.9506	1.31319
Isg20l2	-2.64487	5.41776	0.000197841	0.0049703	D	73.2484	11.6993
Itpripl1	-3.4704	3.28126	1.35654e-05	0.000471593	D	17.3483	1.55195
Izumo2	-12.5523	5.45757	9.70376e-18	2.69055e-15	D	87.3084	0
Jup	-4.22746	4.51024	1.18009e-07	6.14898e-06	D	42.7471	2.26823
Kcnk5	-4.14625	2.82633	2.31011e-06	9.42957e-05	D	12.9262	0.716284
Kctd16	-3.10525	3.33234	8.41013e-05	0.00232619	D	17.5751	2.02947
Kif2b	-3.04932	8.65647	1.63268e-05	0.000554868	D	719.557	86.9092
Klc3	-4.58171	2.97924	3.49723e-07	1.65998e-05	D	14.627	0.596904
Klf17	-11.1636	4.08342	1.08065e-13	1.45383e-11	D	33.3359	0
Klf5	-6.09793	3.72424	3.14468e-10	2.39122e-08	D	25.5122	0.358142
Klhl10	-4.72068	7.78793	8.38922e-10	6.13303e-08	D	425.317	16.1164
Klk1b7-ps	-5.12196	1.40275	2.2545e-05	0.00073226	D	4.64889	0.119381
Klk1b8	-10.432	3.36667	1.24985e-11	1.18506e-09	D	20.0696	0
Klk1b9	-8.79946	1.80629	2.22885e-07	1.09449e-05	D	6.46309	0
Klrb1	-8.82449	1.82959	1.93558e-07	9.65072e-06	D	6.57648	0
Knstrn	-2.92219	5.61404	4.70905e-05	0.00139407	D	86.0611	11.3412
Krt88	-4.94958	6.02782	4.80118e-10	3.55569e-08	D	125.86	4.05895
Lelp1	-13.2031	6.10503	1.1529e-19	6.55306e-17	D	137.086	0
Lemd1	-4.1626	4.11538	1.90511e-07	9.51967e-06	D	32.3154	1.79071
Lexm	-10.9808	3.90373	3.57581e-13	4.39457e-11	D	29.3674	0
Lipe	-3.89005	6.6648	1.65738e-07	8.41118e-06	D	189.584	12.7737
Lipf	-3.57346	1.40448	0.000405979	0.00900521	D	4.42211	0.358142
Lmnb2	-5.82901	6.60549	2.02078e-12	2.1983e-10	D	190.831	3.34266
Lmntd1	-6.35737	4.68048	5.3285e-12	5.43268e-10	D	50.1173	0.596904
LOC101055749	-9.55021	2.51495	2.97568e-09	1.98986e-07	D	10.8852	0
Lpp	-2.60958	5.14981	0.000238922	0.00577885	D	60.5489	9.9086
Lrrc18	-4.37466	8.09959	6.7345e-09	4.24143e-07	D	522.83	25.1893
Lrrc52	-6.8127	3.87105	2.77453e-11	2.49335e-09	D	28.4603	0.238761
Lrrc57	-4.44608	5.50276	1.22969e-08	7.51567e-07	D	86.1745	3.93956
Lrrc69	-4.05495	3.44719	8.80452e-07	3.92601e-05	D	20.0696	1.19381
Lrrc72	-10.8948	3.81929	6.36838e-13	7.50215e-11	D	27.6666	0
Lrrc74a	-8.53496	6.12058	2.89833e-17	7.40409e-15	D	138.219	0.358142
Lrrc8b	-5.66856	7.93791	2.03128e-12	2.1992e-10	D	480.423	9.43108
Lrrc8c	-3.34381	2.31934	0.000104384	0.00279868	D	8.61745	0.835665
Lrrd1	-5.33145	3.68716	3.7849e-09	2.4871e-07	D	24.6051	0.596904
Luzp1	-3.71709	7.01799	4.15646e-07	1.95655e-05	D	240.382	18.2653
Ly6g6c	-7.10976	3.25996	2.68434e-10	2.07589e-08	D	18.4822	0.119381
Lypla1	-2.59131	4.64693	0.000322131	0.00742044	D	42.5203	7.04346
Lyzl1	-5.5498	5.53336	2.62399e-11	2.36742e-09	D	90.1431	1.91009
Lyzl4	-3.98223	5.06564	2.14189e-07	1.06327e-05	D	62.4765	3.93956
Lyzl4os	-11.3389	4.25607	3.39571e-14	4.88639e-12	D	37.6447	0
Lyzl6	-13.1145	6.01683	2.11112e-19	1.04344e-16	D	128.922	0
M1ap	-2.79574	5.87386	8.13629e-05	0.00226422	D	102.049	14.6838
Mageb5	-7.87637	0.968802	2.82471e-05	0.000894464	D	3.40163	0
Map2	-4.85815	5.50022	1.39084e-09	9.70003e-08	D	86.9682	2.98452
Mas1	-3.19148	5.26496	1.28977e-05	0.000451141	D	68.8262	7.52099
Mbd3l1	-6.15923	5.14585	3.21481e-12	3.36829e-10	D	69.2798	0.955046
Mex3b	-3.93444	3.59064	1.18025e-06	5.09468e-05	D	22.1106	1.43257
Mex3d	-6.35508	7.67002	3.38095e-14	4.88639e-12	D	401.845	4.89461
Mfsd9	-3.98732	1.76077	5.56909e-05	0.00163169	D	5.89615	0.358142
Mgat4c	-6.77256	2.93534	2.15843e-09	1.4519e-07	D	14.627	0.119381
Mgat4e	-3.41386	3.60565	1.63997e-05	0.00055574	D	21.7704	2.02947
Micalcl	-10.45	6.55472	5.69761e-20	3.71511e-17	D	187.316	0.119381
Mir1956	-9.28756	2.2649	1.46906e-08	8.85957e-07	D	9.071	0
Mir99ahg	-5.74011	1.96267	9.57264e-07	4.22609e-05	D	7.14342	0.119381
Morn3	-13.6163	6.51677	6.76376e-21	6.40753e-18	D	182.554	0
Mroh3	-3.5009	1.71217	0.000222231	0.00545052	D	5.55599	0.477523
Mroh5	-3.66163	3.82951	4.1561e-06	0.000163201	D	25.8524	2.02947
Mroh7	-7.55005	7.20796	6.3146e-17	1.46499e-14	D	293.56	1.55195
Mrps36	-3.02623	2.99337	0.000120964	0.00318685	D	13.7199	1.67133
Ms4a5	-3.97094	5.97999	1.35084e-07	6.93554e-06	D	118.15	7.52099
Myh15	-4.75576	4.67563	5.01306e-09	3.21062e-07	D	48.7566	1.79071
Nat8f4	-3.04536	3.19554	8.64678e-05	0.00238584	D	15.8743	1.91009
Nbr1	-2.79269	8.27546	6.66239e-05	0.00191499	D	541.085	78.075
Necab3	-5.69383	4.03547	3.92948e-10	2.9292e-08	D	31.6351	0.596904
Nell1os	-7.49491	0.638481	0.000164799	0.00420524	D	2.60791	0
Nemp2	-3.35045	3.46406	1.74913e-05	0.000590033	D	19.616	1.91009
Nipsnap3a	-3.13706	5.1702	1.78879e-05	0.000602518	D	64.1773	7.28223
Nkx2-6	-7.25459	4.30281	1.59599e-12	1.74453e-10	D	38.6652	0.238761
Noxred1	-4.21207	4.4958	1.29823e-07	6.69312e-06	D	42.2936	2.26823
Npb	-5.25586	1.52218	1.13841e-05	0.000406326	D	5.10244	0.119381
Nqo2	-3.73841	2.85017	9.51705e-06	0.000345654	D	12.9262	0.955046
Nrgn	-6.54294	2.71594	9.03865e-09	5.59953e-07	D	12.4726	0.119381
Nsun4	-5.2085	5.71929	1.70739e-10	1.33859e-08	D	102.049	2.74576
Nt5c3b	-3.7391	5.64566	5.91664e-07	2.74532e-05	D	92.6376	6.92408
Nwd2	-7.49491	0.638481	0.000164799	0.00420524	D	2.60791	0
Oaz3	-9.73886	8.86437	5.56393e-23	1.15001e-19	D	930.458	1.07443
Odf1	-3.51352	8.50338	1.16703e-06	5.06365e-05	D	666.832	58.3772
Odf3	-13.6828	6.58311	4.28383e-21	4.63797e-18	D	191.171	0
Odf3b	-5.57008	2.67852	6.43493e-08	3.57015e-06	D	12.0191	0.238761
Olfr112	-10.1934	3.13464	5.9198e-11	4.96651e-09	D	17.0081	0
Olfr183	-7.77727	0.881939	4.53239e-05	0.00135057	D	3.17485	0
Osgin1	-4.99184	6.15046	3.39371e-10	2.56343e-08	D	137.199	4.29771
Otud4	-2.73599	6.71496	9.95328e-05	0.00269402	D	182.214	27.3382
Oxct2a	-8.4162	5.44842	6.69075e-16	1.30018e-13	D	86.5147	0.238761
Oxct2b	-12.8277	5.73141	1.50217e-18	5.5086e-16	D	105.677	0
P2rx3	-5.62973	4.22701	2.87436e-10	2.193e-08	D	36.1706	0.716284
Padi6	-7.77727	0.881939	4.53239e-05	0.00135057	D	3.17485	0
Pappa	-3.56394	2.6942	2.30064e-05	0.00074618	D	11.4521	0.955046
Paqr5	-9.32429	5.43516	1.23645e-16	2.78336e-14	D	85.8344	0.119381
Pcdh9	-4.62425	0.969806	0.000243817	0.00587849	D	3.28824	0.119381
Pcdhgc5	-4.97434	1.27245	4.69243e-05	0.00139278	D	4.19534	0.119381
Pcsk2	-7.36442	0.528181	0.00021796	0.00538168	D	2.38114	0
Pde1a	-3.16354	6.56784	1.02648e-05	0.000372218	D	170.195	18.9815
Pdilt	-8.96798	6.951	3.33491e-19	1.48672e-16	D	246.391	0.477523
Pdp1	-2.73781	4.67221	0.000164142	0.00420524	D	43.881	6.56594
Pdzk1	-8.01258	7.14393	8.01625e-18	2.27822e-15	D	281.201	1.07443
Pex5l	-6.66478	4.98171	7.04409e-13	8.25538e-11	D	62.023	0.596904
Pfkfb3	-2.59107	4.78483	0.000302522	0.00702567	D	46.8291	7.75975
Pfn3	-10.9007	3.82508	6.12154e-13	7.24892e-11	D	27.7799	0
Phactr1	-5.02953	3.39975	2.42168e-08	1.41906e-06	D	19.9562	0.596904
Phospho1	-6.25626	5.40729	1.15979e-12	1.29896e-10	D	83.2265	1.07443
Pip5kl1	-5.64568	1.8758	1.42078e-06	6.01542e-05	D	6.68987	0.119381
Pitpnm2os1	-9.62337	2.58494	1.89581e-09	1.29051e-07	D	11.4521	0
Pkd1l3	-7.55154	5.54462	5.20218e-15	8.96035e-13	D	92.2975	0.477523
Pkib	-7.02874	5.33981	6.21427e-14	8.56289e-12	D	79.8248	0.596904
Pknox2	-5.66316	5.64383	1.25094e-11	1.18506e-09	D	97.5133	1.91009
Pla2g10	-6.85366	4.45995	2.35428e-12	2.51956e-10	D	43.0873	0.358142
Pla2g4d	-3.10652	3.15892	7.01383e-05	0.00199583	D	15.5341	1.79071
Plcz1	-5.49363	6.85885	1.04481e-11	1.00656e-09	D	226.548	5.01399
Plekha6	-7.15093	6.57418	1.51919e-15	2.76323e-13	D	188.677	1.31319
Plin2	-4.12703	5.06528	1.01201e-07	5.40121e-06	D	62.8167	3.58142
Pln	-10.1544	3.09685	7.61991e-11	6.27704e-09	D	16.5546	0
Plpp6	-4.27464	3.15585	6.94915e-07	3.17261e-05	D	16.4412	0.835665
Plppr2	-3.13946	3.44228	6.28426e-05	0.00182011	D	19.0491	2.14885
Pmis2	-6.80739	4.41464	3.13388e-12	3.2987e-10	D	41.7266	0.358142
Pnma2	-8.79946	1.80629	2.22885e-07	1.09449e-05	D	6.46309	0
Pnmal2	-2.68865	5.58127	0.000151079	0.00391668	D	82.4327	12.7737
Pou6f2	-7.92348	1.01033	2.24824e-05	0.000731272	D	3.51501	0
Pp2d1	-5.48766	5.28306	5.35116e-11	4.5397e-09	D	75.6295	1.67133
Ppifos	-8.01331	1.08995	1.44592e-05	0.000498099	D	3.74179	0
Ppm1j	-8.02852	6.01709	2.05192e-16	4.48581e-14	D	128.468	0.477523
Ppm1l	-3.69308	1.87795	8.711e-05	0.00239774	D	6.3497	0.477523
Ppp1r2-ps7	-3.82653	3.37041	2.62535e-06	0.000105803	D	18.8223	1.31319
Ppp1r2-ps9	-10.4957	3.42881	8.66242e-12	8.52592e-10	D	20.9767	0
Ppp2r2b	-6.62374	4.23511	1.04456e-11	1.00656e-09	D	36.7376	0.358142
Pqlc1	-3.86264	4.44106	7.45279e-07	3.35958e-05	D	40.1392	2.74576
Prkag2os1	-4.59872	1.78409	1.28863e-05	0.000451141	D	6.12293	0.238761
Prkar2a	-6.21918	6.09641	3.59903e-13	4.39933e-11	D	134.478	1.79071
Prkcd	-2.75301	5.98092	0.000102366	0.00275756	D	109.532	16.2358
Prkcq	-6.92389	6.06461	1.32234e-14	2.14748e-12	D	132.21	1.07443
Prkg1	-4.97076	3.8095	1.0546e-08	6.51559e-07	D	26.6461	0.835665
Prm1	-10.4057	8.95514	2.58253e-24	1.46791e-20	D	991.347	0.716284
Prm2	-9.211	10.6107	9.78785e-23	1.71182e-19	D	3121.56	5.25275
Prm3	-8.64152	5.67185	1.4653e-16	3.23446e-14	D	101.142	0.238761
Prox1	-4.9391	3.00967	1.01637e-07	5.41176e-06	D	15.0805	0.477523
Prox2	-5.51816	4.68746	1.45569e-10	1.15722e-08	D	49.8905	1.07443
Prr15	-4.62513	1.80776	1.12192e-05	0.000402335	D	6.23631	0.238761
Prr30	-11.7429	7.84454	7.75097e-24	2.9371e-20	D	458.993	0.119381
Prss37	-9.00576	5.11939	1.06267e-15	2.0134e-13	D	68.8262	0.119381
Prss51	-10.0415	2.9875	1.4751e-10	1.16856e-08	D	15.3073	0
Prss52	-10.6785	3.60733	2.58457e-12	2.74592e-10	D	23.8114	0
Prss55	-12.0591	4.96806	2.77064e-16	5.816e-14	D	62.023	0
Prss58	-4.12892	3.98682	2.64778e-07	1.28908e-05	D	29.4808	1.67133
Pth2	-3.41	1.63479	0.000341233	0.00778162	D	5.21583	0.477523
Pwwp2b	-7.61122	7.37448	3.4315e-17	8.57346e-15	D	329.618	1.67133
Rangap1	-3.03078	7.04148	1.98702e-05	0.000658554	D	234.259	28.6514
Rapgef5	-3.85969	3.83474	1.15102e-06	5.01334e-05	D	26.1925	1.79071
Rasal1	-5.71902	3.35974	3.28018e-09	2.16797e-07	D	19.616	0.358142
Rassf9	-9.71992	2.67753	1.13224e-09	8.06977e-08	D	12.2459	0
Rbm43	-4.25399	4.53516	1.02444e-07	5.42928e-06	D	43.5408	2.26823
Rbm47	-3.3429	2.80488	4.62558e-05	0.00137473	D	12.2459	1.19381
Rcc1	-3.06353	6.14423	1.88358e-05	0.000628855	D	125.86	15.042
Rec8	-4.44731	6.20904	7.00801e-09	4.40149e-07	D	140.941	6.44656
Retreg1	-5.05166	4.86146	8.84911e-10	6.38709e-08	D	55.9001	1.67133
Rexo1	-2.49234	5.79922	0.000384684	0.00866381	D	94.1117	16.7133
Rffl	-5.00225	6.27521	2.84494e-10	2.17787e-08	D	149.672	4.65585
Rnf133	-13.0363	5.93897	3.58856e-19	1.53293e-16	D	122.118	0
Rnf148	-11.3258	4.24317	3.71189e-14	5.30777e-12	D	37.3045	0
Rnf151	-9.77788	6.80202	6.19812e-20	3.91446e-17	D	222.353	0.238761
Rnpepl1	-3.14	4.25394	2.76501e-05	0.000881701	D	33.7895	3.82018
Ropn1	-10.781	6.8846	5.87007e-21	5.80269e-18	D	235.619	0.119381
Rsf1os1	-7.43114	0.584393	0.000164799	0.00420524	D	2.49453	0
Samd4	-8.55948	7.52092	2.83539e-19	1.28931e-16	D	365.788	0.955046
Satl1	-11.5748	4.48887	7.16162e-15	1.20612e-12	D	44.3345	0
Saxo1	-8.95004	5.06423	1.56236e-15	2.81919e-13	D	66.2183	0.119381
Saxo1os	-9.59455	2.55735	2.26493e-09	1.51904e-07	D	11.2254	0
Scamp1	-3.18089	5.81328	1.14957e-05	0.000409025	D	100.802	11.1024
Scgn	-5.69367	1.91989	1.09006e-06	4.75692e-05	D	6.91664	0.119381
Scp2d1	-10.122	6.22803	5.3776e-19	2.18331e-16	D	149.218	0.119381
Scube2	-3.67716	3.75842	2.84316e-06	0.000114007	D	24.6051	1.91009
Sec14l2	-4.01473	1.78483	4.85126e-05	0.00143059	D	6.00954	0.358142
Sec23a	-2.47653	5.35976	0.000446554	0.00980951	D	69.1664	12.4156
Selenov	-2.67602	7.26942	0.000129192	0.003384	D	266.347	41.6639
2018-09-04	-5.32396	5.83128	8.05961e-11	6.61528e-09	D	110.553	2.74576
Sez6l	-5.00711	3.8441	8.37221e-09	5.20084e-07	D	27.3264	0.835665
Sgf29	-3.83197	6.65034	2.3262e-07	1.13739e-05	D	187.203	13.1319
Sh3d21	-6.09771	8.37758	1.13284e-13	1.51508e-11	D	655.04	9.55046
Sh3rf2	-9.87641	5.98367	2.88707e-18	8.87033e-16	D	125.86	0.119381
Shcbp1	-2.60556	5.32446	0.000247229	0.00594814	D	68.3727	11.2218
Skp2	-4.93156	5.02152	1.91079e-09	1.29297e-07	D	62.3631	2.02947
Slc16a7	-2.43436	8.0471	0.000423246	0.00933359	D	445.953	82.4921
Slc22a14	-6.98434	7.1892	1.83781e-15	3.29011e-13	D	289.025	2.26823
Slc25a35	-3.46094	3.2728	1.43001e-05	0.00049488	D	17.2349	1.55195
Slc25a37	-3.54995	3.95695	5.66512e-06	0.000214313	D	28.1201	2.38761
Slc25a41	-7.15332	3.30208	2.02651e-10	1.5779e-08	D	19.0491	0.119381
Slc36a3	-5.3181	3.6744	4.12101e-09	2.68468e-07	D	24.3783	0.596904
Slc39a12	-4.89446	1.20258	6.91332e-05	0.00196969	D	3.96856	0.119381
Slc44a5	-5.14654	2.28307	7.1557e-07	3.26036e-05	D	8.95762	0.238761
Slco5a1	-7.55597	0.690598	0.000125561	0.0033003	D	2.7213	0
Slfn5os	-8.8491	1.85252	1.6842e-07	8.47169e-06	D	6.68987	0
Slfnl1	-4.67726	7.04634	1.29906e-09	9.17247e-08	D	253.875	9.9086
Smcp	-10.6852	8.97721	8.32574e-25	6.3098e-21	D	1006.77	0.596904
Smim23	-11.8092	4.72062	1.49737e-15	2.76323e-13	D	52.1583	0
Smim6	-3.21571	3.15853	4.45749e-05	0.00133525	D	15.6475	1.67133
Smok2a	-8.25346	1.30526	4.27844e-06	0.000167049	D	4.42211	0
Smok2b	-8.13838	1.20165	7.72046e-06	0.000285418	D	4.08195	0
Smok4a	-7.96909	1.0507	1.79859e-05	0.000603137	D	3.6284	0
Sncaip	-8.08241	4.20839	5.0656e-13	6.02991e-11	D	36.284	0.119381
Sox5	-5.28774	6.58827	4.30123e-11	3.71836e-09	D	187.089	4.77523
Sox5os3	-9.89558	2.84655	3.73727e-10	2.79508e-08	D	13.8333	0
Spaca4	-2.67982	5.79663	0.000147382	0.00382519	D	95.6991	14.9226
Spaca6	-3.15345	4.50991	2.16535e-05	0.000713499	D	40.4794	4.53647
Spaca7	-6.63789	6.06718	4.89272e-14	6.90937e-12	D	132.21	1.31319
Spaca9	-3.31362	6.41374	4.55215e-06	0.000176919	D	154.434	15.5195
Spag4	-3.10163	7.10465	1.34149e-05	0.000467794	D	246.051	28.6514
Spam1	-7.04497	5.61156	2.58719e-14	3.8446e-12	D	96.4928	0.716284
Spanxn4	-11.5968	4.51056	6.16052e-15	1.05312e-12	D	45.0149	0
Spata19	-5.35969	6.88971	2.22385e-11	2.03877e-09	D	230.97	5.6109
Spata25	-11.4109	4.32709	2.13965e-14	3.34834e-12	D	39.5723	0
Spata3	-9.75115	6.77539	7.44349e-20	4.45356e-17	D	218.271	0.238761
Spata31	-14.1477	7.04677	1.74686e-22	2.64777e-19	D	263.853	0
Spata31d1a	-4.01571	5.18087	1.61871e-07	8.23333e-06	D	67.8058	4.17833
Spata31d1b	-9.43078	5.54084	6.04186e-17	1.41616e-14	D	92.4108	0.119381
Spata31d1c	-11.0408	3.96265	2.47722e-13	3.14648e-11	D	30.6146	0
Spata31d1d	-8.9647	5.99276	1.6135e-17	4.31584e-15	D	126.54	0.238761
Spata32	-5.11122	4.70056	8.83663e-10	6.38709e-08	D	50.0039	1.43257
Spata9	-7.70776	5.30071	7.8396e-15	1.30103e-12	D	77.8972	0.358142
Spatc1	-12.809	5.71281	1.69362e-18	5.92403e-16	D	104.317	0
Spem1	-8.58525	6.88267	1.60021e-18	5.70785e-16	D	234.826	0.596904
Spem2	-14.0376	6.93691	3.73452e-22	5.30676e-19	D	244.464	0
Spert	-6.17175	7.83083	8.86718e-14	1.20003e-11	D	448.561	6.2078
Sppl2c	-13.8756	6.77531	1.13765e-21	1.5215e-18	D	218.498	0
Spsb1	-4.28225	5.00745	4.81656e-08	2.75842e-06	D	60.6623	3.1039
Spta1	-11.2539	4.17233	6.05102e-14	8.38878e-12	D	35.4903	0
Spz1	-6.44081	8.96347	1.07862e-14	1.76427e-12	D	986.472	11.3412
Sqor	-5.50441	7.5187	7.05527e-12	7.04678e-10	D	358.305	7.87913
Srpk2	-2.88737	7.18701	4.33153e-05	0.00130086	D	256.256	34.6204
Srr	-2.66496	4.75727	0.000218182	0.00538168	D	46.2621	7.28223
Srxn1	-3.11255	3.49441	6.56467e-05	0.0018893	D	19.7294	2.26823
St6galnac2	-8.57158	8.22424	5.71907e-20	3.71511e-17	D	595.965	1.55195
St8sia3	-9.373	5.48349	8.92435e-17	2.04953e-14	D	88.7824	0.119381
Stambpl1	-5.68467	4.99779	3.61075e-11	3.18194e-09	D	62.1364	1.19381
Stat4	-3.26348	7.97501	5.04654e-06	0.000193488	D	455.251	47.3942
Stk-ps2	-4.45128	3.81611	8.68182e-08	4.72224e-06	D	26.4193	1.19381
Ston1	-6.00003	4.33212	5.54684e-11	4.68821e-09	D	39.1187	0.596904
Stox2	-3.58605	3.84124	5.69178e-06	0.000214964	D	25.9657	2.14885
Stpg3	-7.76941	5.36166	5.19401e-15	8.96035e-13	D	81.2989	0.358142
Sun5	-7.76642	6.06924	4.27412e-16	8.59968e-14	D	133.117	0.596904
Sycp1-ps1	-3.97497	1.23886	0.000277936	0.00655515	D	3.96856	0.238761
Synj2	-3.14432	5.02873	1.88039e-05	0.000628713	D	58.1678	6.56594
Tas1r1	-10.48	3.41352	9.60589e-12	9.33332e-10	D	20.7499	0
Tbc1d21	-10.1099	6.21598	5.8548e-19	2.33535e-16	D	147.971	0.119381
Tbc1d23	-2.76252	5.05799	0.000120513	0.00318067	D	57.6009	8.47603
Tbx5	-3.57346	1.40448	0.000405979	0.00900521	D	4.42211	0.358142
Tcp11x2	-4.56518	4.17939	2.7522e-08	1.60036e-06	D	34.243	1.43257
Tctex1d1	-5.31317	5.11384	1.6618e-10	1.30736e-08	D	67.012	1.67133
Tepp	-11.5711	4.48522	7.34525e-15	1.22795e-12	D	44.2211	0
Tescl	-6.51575	5.81152	1.47295e-13	1.94704e-11	D	110.553	1.19381
Tex13a	-8.5252	4.64432	2.69149e-14	3.97362e-12	D	49.3236	0.119381
Tex13c1	-6.46883	4.08409	2.8407e-11	2.54276e-09	D	32.9958	0.358142
Tex24	-8.50517	4.62456	3.08728e-14	4.52854e-12	D	48.6433	0.119381
Tex29	-4.05264	5.80887	8.30852e-08	4.54092e-06	D	105.224	6.32718
Tex35	-7.09081	5.87401	1.03555e-14	1.7061e-12	D	115.882	0.835665
Tex36	-10.0186	6.12515	1.09332e-18	4.14295e-16	D	138.9	0.119381
Tex37	-4.36675	5.14109	2.72019e-08	1.58988e-06	D	66.7853	3.22328
Tex38	-5.98105	4.9717	1.05359e-11	1.01073e-09	D	61.2293	0.955046
Tex43	-11.9438	4.85389	6.03444e-16	1.18275e-13	D	57.2607	0
Tex44	-5.50256	4.82095	1.1719e-10	9.34884e-09	D	54.7662	1.19381
Tex46	-8.94354	1.94074	9.83586e-08	5.26344e-06	D	7.14342	0
Tex48	-13.1334	6.03566	1.84868e-19	9.55263e-17	D	130.622	0
Tex50	-11.5895	4.50337	6.47599e-15	1.09879e-12	D	44.7881	0
Tex52	-3.0151	2.21769	0.000381713	0.00861908	D	7.82374	0.955046
Tfam	-4.59085	5.35408	6.65867e-09	4.20532e-07	D	78.0106	3.22328
Tigd5	-3.19167	2.36843	0.000159943	0.00412299	D	8.84423	0.955046
Tle3	-3.19329	5.67848	1.04848e-05	0.00037959	D	91.8439	10.028
Tmc5	-4.7442	6.06288	1.46271e-09	1.01701e-07	D	128.355	4.77523
Tmc7	-3.70449	7.12364	4.31625e-07	2.02339e-05	D	258.524	19.8172
Tmco2	-13.1632	6.06527	1.51329e-19	8.3345e-17	D	133.344	0
Tmco5	-4.75252	7.37222	7.73722e-10	5.69299e-08	D	318.959	11.8187
Tmco5b	-7.07395	3.22536	3.38095e-10	2.56231e-08	D	18.0286	0.119381
Tmem131l	-3.6483	6.22329	7.19328e-07	3.27093e-05	D	137.879	10.983
Tmem132cos	-9.7332	2.69028	1.04166e-09	7.47103e-08	D	12.3592	0
Tmem144	-7.1966	4.7966	2.40276e-13	3.06906e-11	D	54.6528	0.358142
Tmem178b	-2.74963	3.72498	0.000248995	0.00597799	D	22.5641	3.34266
Tmem191c	-5.37507	5.44983	1.10114e-10	8.81531e-09	D	84.8139	2.02947
Tmem205	-3.60014	4.66864	2.11275e-06	8.68634e-05	D	46.4889	3.82018
Tmem210	-11.831	4.74218	1.28851e-15	2.40127e-13	D	52.952	0
Tmem239	-8.00844	4.13577	8.34811e-13	9.58599e-11	D	34.4698	0.119381
Tmem247	-6.17871	6.31677	4.76612e-13	5.73347e-11	D	156.702	2.14885
Tmem269	-3.29262	4.20068	1.42267e-05	0.000493828	D	32.8824	3.34266
Tmem270	-5.05448	4.52317	1.60198e-09	1.10707e-07	D	44.1078	1.31319
Tmem45a2	-7.29447	0.469671	0.000290613	0.00679772	D	2.26775	0
Tmem56	-4.88945	5.28169	1.59257e-09	1.10392e-07	D	74.7224	2.507
Tmem63c	-4.13466	4.49598	1.87476e-07	9.38866e-06	D	42.1802	2.38761
Tmem79	-4.20027	2.62788	2.972e-06	0.000118964	D	11.2254	0.596904
Tmem81	-3.5076	3.31458	1.10146e-05	0.000397506	D	17.8018	1.55195
Tmem82	-8.28987	1.3382	3.54078e-06	0.000139762	D	4.5355	0
Tmem95	-10.1643	3.10639	7.14954e-11	5.95429e-09	D	16.668	0
Tmigd3	-6.2399	4.82038	5.43817e-12	5.51974e-10	D	55.2197	0.716284
Tmod1	-2.83976	3.25792	0.000271371	0.00642028	D	16.3278	2.26823
Tmsb15a	-9.07453	2.06368	5.21778e-08	2.95103e-06	D	7.82374	0
Tnfaip2	-3.89223	5.35967	2.7032e-07	1.31325e-05	D	76.4232	5.13337
Tnp1	-11.9141	8.93419	2.47009e-26	2.808e-22	D	977.514	0.238761
Tnp2	-16.343	9.23968	4.52274e-29	1.02829e-24	D	1208.48	0
Tppp2	-12.6128	5.51773	6.44292e-18	1.87803e-15	D	91.0502	0
Trem1	-8.21611	1.27155	5.18875e-06	0.000196947	D	4.30873	0
Trh	-7.29447	0.469671	0.000290613	0.00679772	D	2.26775	0
Trim17	-3.57736	7.22302	9.04858e-07	4.0103e-05	D	275.192	23.0405
Trim38	-4.67294	1.01132	0.000195424	0.00491499	D	3.40163	0.119381
Trim42	-10.7521	3.67937	1.58485e-12	1.74074e-10	D	25.0586	0
Trim66	-5.8521	4.65828	3.87908e-11	3.37911e-09	D	49.0968	0.835665
Trim80	-9.018	6.04572	1.12127e-17	3.07146e-15	D	131.303	0.238761
Triml1	-8.29601	5.32937	1.51904e-15	2.76323e-13	D	79.5981	0.238761
Trp53tg5	-7.04561	4.09827	6.11071e-12	6.14749e-10	D	33.4493	0.238761
Tsks	-4.64026	7.95523	1.28512e-09	9.1023e-08	D	476.681	19.1009
Tspan6	-4.06157	5.05067	1.44338e-07	7.39115e-06	D	62.023	3.7008
Tssk1	-2.50108	7.62003	0.000309301	0.00713935	D	333.926	58.9741
Tssk2	-6.82729	7.48299	2.77841e-15	4.89689e-13	D	354.109	3.1039
Tssk3	-8.96212	5.99019	1.64297e-17	4.34355e-15	D	126.314	0.238761
Tssk5	-7.43335	4.47824	4.88702e-13	5.84797e-11	D	43.7676	0.238761
Tssk6	-9.86467	5.97199	3.13467e-18	9.31828e-16	D	124.84	0.119381
Tstd3	-4.57385	0.927046	0.000305695	0.0070633	D	3.17485	0.119381
Ttc24	-3.81103	4.26456	1.18084e-06	5.09468e-05	D	35.3769	2.507
Ttc39a	-5.69593	6.66652	3.9349e-12	4.08511e-10	D	198.768	3.82018
Ttll2	-9.21368	2.19495	2.28675e-08	1.34345e-06	D	8.61745	0
Tuba1c	-2.69698	3.91194	0.000274401	0.00648522	D	25.6256	3.93956
Tuba4a	-3.81683	5.22156	4.44095e-07	2.07756e-05	D	69.1664	4.89461
Tuba8	-9.22426	6.25082	2.75222e-18	8.57185e-16	D	151.486	0.238761
Tubb6	-3.40917	4.88205	4.71292e-06	0.000182543	D	53.4055	5.01399
Txndc2	-4.40243	7.69115	5.9327e-09	3.77831e-07	D	394.135	18.6234
Txndc8	-9.33568	5.44645	1.14227e-16	2.59707e-14	D	86.5147	0.119381
Ube2dnl1	-8.94354	1.94074	9.83586e-08	5.26344e-06	D	7.14342	0
Ube2dnl2	-3.09634	2.10697	0.000356572	0.00809893	D	7.2568	0.835665
Ube4bos3	-9.40839	2.37968	7.07851e-09	4.43352e-07	D	9.86472	0
Ubl4b	-9.92245	6.02947	2.1097e-18	6.85232e-16	D	129.942	0.119381
Ubqln3	-6.05591	7.84877	2.06068e-13	2.64699e-11	D	453.664	6.8047
Ubqlnl	-13.4074	6.30861	2.82649e-20	2.1421e-17	D	157.949	0
Unc93a	-5.08645	1.37127	2.69459e-05	0.000860453	D	4.5355	0.119381
Uqcc1	-2.66386	4.65963	0.000233397	0.00565124	D	43.2007	6.8047
Uri1	-4.02316	6.13848	9.26914e-08	5.02967e-06	D	132.21	8.11789
Usp25	-3.60349	6.24308	9.9129e-07	4.36782e-05	D	139.467	11.4606
Usp50	-12.7201	5.62438	3.11921e-18	9.31828e-16	D	98.0802	0
Vars	-3.1605	7.72108	9.18839e-06	0.000335324	D	379.055	42.3802
Vav3	-4.07337	3.59712	6.42155e-07	2.9495e-05	D	22.3373	1.31319
Vgll3	-4.18038	3.41651	5.60297e-07	2.6051e-05	D	19.7294	1.07443
Vmn2r-ps11	-8.79946	1.80629	2.22885e-07	1.09449e-05	D	6.46309	0
Vmn2r-ps54	-8.66732	1.68373	4.65727e-07	2.17429e-05	D	5.89615	0
Vmn2r7	-8.5818	1.60484	7.45e-07	3.35958e-05	D	5.55599	0
Vsig1	-4.9617	4.87281	1.34391e-09	9.43063e-08	D	56.2402	1.79071
Vsig10	-2.92843	2.44691	0.000355341	0.00807904	D	9.18439	1.19381
Wbp2nl	-5.24892	4.0753	1.84038e-09	1.26413e-07	D	32.3154	0.835665
Wbscr17	-3.55847	1.76152	0.000168571	0.00429666	D	5.78276	0.477523
Wbscr25	-3.62573	6.64281	7.46212e-07	3.35958e-05	D	184.368	14.9226
Wdr13	-2.94171	3.67341	0.000114561	0.00303574	D	22.1106	2.86514
Wdr64	-4.99187	5.57068	6.34674e-10	4.68505e-08	D	91.6171	2.86514
Wnt3	-3.91086	3.44751	1.60597e-06	6.72437e-05	D	19.9562	1.31319
Wscd2	-3.31463	2.08711	0.000184741	0.00469305	D	7.2568	0.716284
Wwtr1	-4.25399	4.53516	1.02444e-07	5.42928e-06	D	43.5408	2.26823
Zcchc13	-6.82414	3.8822	2.57229e-11	2.33002e-09	D	28.687	0.238761
Zdhhc19	-9.50663	5.61615	3.60263e-17	8.80746e-15	D	97.3999	0.119381
Zdhhc25	-7.23206	4.8315	1.88646e-13	2.45089e-11	D	56.0134	0.358142
Zfp185	-3.42912	3.01257	2.32823e-05	0.000752702	D	14.2868	1.31319
Zfp219	-3.45012	4.57578	4.88225e-06	0.00018812	D	43.2007	3.93956
Zfp458	-6.78369	2.94601	2.01254e-09	1.35778e-07	D	14.7404	0.119381
Zfp536	-7.29447	0.469671	0.000290613	0.00679772	D	2.26775	0
Zfp558	-2.93129	4.27623	7.2183e-05	0.00204632	D	33.7895	4.41709
Zfp58	-3.72769	3.28054	4.6408e-06	0.000180057	D	17.5751	1.31319
Zfp618	-4.22456	2.35013	5.9495e-06	0.000223665	D	9.18439	0.477523
Zfp65	-3.09604	2.84057	0.000113548	0.00301944	D	12.3592	1.43257
Zfp72	-4.33959	3.40075	3.07142e-07	1.47949e-05	D	19.616	0.955046
Zfp941	-5.41222	2.53028	1.5198e-07	7.74759e-06	D	10.7718	0.238761
Zic5	-8.8491	1.85252	1.6842e-07	8.47169e-06	D	6.68987	0
Znrf4	-4.00691	7.25052	7.20808e-08	3.96811e-06	D	286.19	17.7877
a	0.252899	1.06731	0.913871	1	M	1.70081	2.02947
A1bg	0	-2.10399	1	1	M	0	0
A1cf	-0.204145	1.0242	0.824298	1	M	1.92759	1.67133
A2m	1.14099	3.93593	0.102748	0.608193	M	9.41117	20.7723
A2ml1	1.94353	-0.931693	0.430642	1	M	0.113388	0.477523
A3galt2	-3.13737	-1.78287	1	1	M	0.113388	0
A4galt	1.3774	0.545321	0.219277	0.899418	M	0.680325	1.79071
A4gnt	0	-2.10399	1	1	M	0	0
A630020A06	1.21466	0.946383	0.232646	0.927977	M	1.02049	2.38761
AA387883	4.12291	-1.51737	0.52381	1	M	0	0.238761
AA388235	0	-2.10399	1	1	M	0	0
AA413626	0	-2.10399	1	1	M	0	0
AA414768	0.329802	-0.196233	1	1	M	0.566938	0.716284
AA465934	0	-2.10399	1	1	M	0	0
AA467197	0.262512	6.26996	0.692561	1	M	69.9601	83.9247
AA536875	0	-2.10399	1	1	M	0	0
AA543186	0.954658	0.484755	0.431875	1	M	0.793713	1.55195
AA543401	0	-2.10399	1	1	M	0	0
AA545190	0	-2.10399	1	1	M	0	0
AA619741	0	-2.10399	1	1	M	0	0
AA792892	4.68	-1.2942	0.285714	0.985287	M	0	0.358142
AA986860	-1.07968	2.34677	0.159851	0.775745	M	6.57648	3.1039
Aaas	0.0253805	4.38012	0.970952	1	M	20.4098	20.7723
Aacs	1.26567	4.03862	0.0690698	0.477316	M	9.52455	22.9211
Aadac	0	-2.10399	1	1	M	0	0
Aadacl2	0	-2.10399	1	1	M	0	0
Aadacl3	0	-2.10399	1	1	M	0	0
Aadacl4	0	-2.10399	1	1	M	0	0
Aadat	-3.13737	-1.78287	1	1	M	0.113388	0
Aaed1	1.15015	3.92491	0.100009	0.596934	M	9.29778	20.6529
Aagab	1.12433	3.92466	0.107809	0.628014	M	9.41117	20.5335
Aak1	-0.0273262	6.05049	0.969229	1	M	66.6719	65.4207
Aamdc	-0.141288	3.98191	0.8481	1	M	16.3278	14.8032
Aamp	0.0733202	8.99777	0.911144	1	M	497.998	523.962
Aanat	0.0660534	-1.51899	1	1	M	0.113388	0.119381
Aar2	0.676076	4.85517	0.315724	1	M	22.1106	35.3367
Aard	0.936481	3.08487	0.201027	0.858157	M	5.66938	10.8636
Aars	0.465514	7.56988	0.479254	1	M	159.423	220.138
Aars2	0.323973	5.39579	0.63164	1	M	37.1911	46.5585
Aarsd1	0.52276	4.25944	0.440791	1	M	15.5341	22.3242
Aasdh	0.173345	2.40529	0.854685	1	M	4.76228	5.37213
Aasdhppt	0.27972	3.98125	0.690456	1	M	14.0601	17.0714
Aass	-1.40524	-1.10546	0.658385	1	M	0.340163	0.119381
Aatf	0.263539	5.9244	0.695076	1	M	54.993	66.0176
Aatk	-1.80542	-0.936242	0.430642	1	M	0.45355	0.119381
AB124611	3.49979	-0.00913241	0.0197869	0.199767	M	0.113388	1.43257
Abat	0.602486	2.02992	0.442635	1	M	3.06146	4.65585
Abca1	1.5408	4.3961	0.0266568	0.248695	M	10.6584	31.039
Abca12	2.22624	2.51254	0.00513933	0.0712487	M	1.92759	9.07294
Abca13	-6.56362	-0.111738	0.00416566	0.0595999	M	1.36065	0
Abca14	0.212747	6.64183	0.748186	1	M	92.2975	106.965
Abca15	-0.0585426	5.70103	0.933504	1	M	52.8386	50.7368
Abca16	0.353821	6.65949	0.591726	1	M	88.5557	113.173
Abca17	0.185741	6.21234	0.779648	1	M	69.1664	78.6719
Abca2	-0.244061	4.48566	0.717213	1	M	24.0382	20.2947
Abca3	0.341067	2.84173	0.657004	1	M	6.12293	7.75975
Abca4	1.19117	0.221909	0.352672	1	M	0.566938	1.31319
Abca5	0.620579	4.69109	0.355998	1	M	20.183	31.039
Abca6	1.46218	1.36386	0.0994744	0.596934	M	1.24726	3.46204
Abca7	0.429089	3.21318	0.553447	1	M	7.71035	10.3861
Abca8a	1.43387	1.45918	0.101443	0.602198	M	1.36065	3.7008
Abca8b	1.62832	0.223149	0.187026	0.832137	M	0.45355	1.43257
Abca9	-0.394638	3.46179	0.584812	1	M	12.2459	9.3117
Abcb10	-0.338283	1.17948	0.7571	1	M	2.26775	1.79071
Abcb11	-1.40566	2.20738	0.0755634	0.507386	M	6.3497	2.38761
Abcb1a	0.905166	0.0687283	0.542974	1	M	0.566938	1.07443
Abcb1b	1.61828	-0.0998027	0.251568	0.967592	M	0.340163	1.07443
Abcb4	0.313674	1.59856	0.698707	1	M	2.49453	3.1039
Abcb5	0	-2.10399	1	1	M	0	0
Abcb6	-0.44343	4.9187	0.515581	1	M	34.5832	25.4281
Abcb7	0.0268921	1.91858	1	1	M	3.51501	3.58142
Abcb8	0.468462	4.44053	0.496409	1	M	18.0286	24.9506
Abcb9	0.154	5.98803	0.818526	1	M	59.8686	66.6145
Abcc1	0.218242	2.85226	0.786598	1	M	6.46309	7.52099
Abcc10	-0.0983181	2.81395	0.915986	1	M	7.03003	6.56594
Abcc12	0.0322757	7.12944	0.962213	1	M	138.219	141.347
Abcc2	-1.45588	-0.521738	0.372947	1	M	0.680325	0.238761
Abcc3	0.615444	6.61444	0.352565	1	M	77.2169	118.306
Abcc4	1.31763	2.31582	0.084547	0.545013	M	2.7213	6.8047
Abcc5	1.33486	3.20323	0.0645214	0.451928	M	5.10244	12.8931
Abcc6	-4.05297	-1.5206	0.52381	1	M	0.226775	0
Abcc8	-0.0766848	0.41927	1	1	M	1.13388	1.07443
Abcc9	2.82932	2.40674	0.000671796	0.0138226	M	1.24726	8.95356
Abcd1	-0.183688	5.22248	0.790172	1	M	39.4589	34.7398
Abcd2	0.627031	-0.93321	1	1	M	0.226775	0.358142
Abcd3	0.586676	2.07049	0.454799	1	M	3.17485	4.77523
Abcd4	-0.145282	-0.0169617	1	1	M	0.793713	0.716284
Abce1	0.202908	6.14646	0.758774	1	M	65.6514	75.568
Abcf1	0.0389303	7.3778	0.953871	1	M	163.845	168.327
Abcf2	-0.207867	7.97784	0.751788	1	M	269.976	233.748
Abcf3	-0.246622	6.87091	0.709004	1	M	126.767	106.846
Abcg1	2.43413	2.08175	0.00396363	0.0583282	M	1.24726	6.8047
Abcg2	-0.455015	4.25285	0.504612	1	M	21.7704	15.8776
Abcg3	0.985538	-1.29578	1	1	M	0.113388	0.238761
Abcg4	0.0713364	-0.781948	1	1	M	0.340163	0.358142
Abcg5	0.069938	-1.10391	1	1	M	0.226775	0.238761
Abcg8	0.326624	1.82913	0.688667	1	M	2.94808	3.7008
Abhd1	0.985538	-1.29578	1	1	M	0.113388	0.238761
Abhd10	0.526324	3.99983	0.446936	1	M	12.9262	18.6234
Abhd11	0.681892	5.21471	0.311021	1	M	28.3469	45.4841
Abhd11os	0.0660534	-1.51899	1	1	M	0.113388	0.119381
Abhd12	0.377978	5.65217	0.57149	1	M	43.5408	56.5865
Abhd12b	0	-2.10399	1	1	M	0	0
Abhd13	0.597869	2.60175	0.420439	1	M	4.64889	7.04346
Abhd14a	0.667448	6.41004	0.313003	1	M	65.538	104.1
Abhd14b	0.779556	2.2774	0.311546	1	M	3.40163	5.84966
Abhd15	1.8169	-0.399882	0.266667	0.984391	M	0.226775	0.835665
Abhd16a	0.080179	6.42351	0.905029	1	M	83.2265	87.9836
Abhd17a	0.529799	6.7606	0.422234	1	M	88.5557	127.857
Abhd17b	0.655397	7.20911	0.320558	1	M	114.748	180.742
Abhd17c	0.517696	3.11054	0.469491	1	M	6.91664	9.9086
Abhd18	-0.464413	3.44582	0.518908	1	M	12.3592	8.95356
Abhd2	-1.35012	6.06163	0.0444361	0.355364	M	95.5857	37.4856
Abhd3	1.12902	2.19019	0.141526	0.734958	M	2.7213	5.96904
Abhd4	-0.546717	7.47554	0.406436	1	M	211.014	144.451
Abhd5	-1.39259	6.69042	0.0375663	0.316423	M	149.218	56.8252
Abhd6	0.379522	3.26616	0.60361	1	M	8.1639	10.6249
Abhd8	-0.183912	7.32414	0.78041	1	M	170.195	149.823
Abi1	1.29153	3.60243	0.064762	0.452637	M	6.91664	16.9521
Abi2	0.817733	5.32775	0.221477	0.905017	M	28.9138	50.9756
Abi3	1.19117	0.221909	0.352672	1	M	0.566938	1.31319
Abl1	-0.845911	6.00091	0.2038	0.864638	M	81.9792	45.6034
Abl2	0.63528	4.18385	0.355333	1	M	14.0601	21.8467
Ablim1	0.702775	2.2768	0.363648	1	M	3.51501	5.73028
Ablim3	0.15768	3.0473	0.83408	1	M	7.59697	8.47603
Abo	-2.37537	-0.648068	0.186957	0.832137	M	0.680325	0.119381
Abr	0.371701	3.0289	0.605009	1	M	6.91664	8.95356
Abra	0	-2.10399	1	1	M	0	0
Abracl	2.20844	0.604654	0.0456519	0.36241	M	0.45355	2.14885
Abraxas1	-0.709216	2.26531	0.363648	1	M	5.66938	3.46204
Abraxas2	0.477984	5.72042	0.473596	1	M	43.881	61.1229
Abt1	0.502882	2.79549	0.501624	1	M	5.55599	7.87913
Abtb1	0.163435	4.10241	0.814161	1	M	15.9876	17.9071
Abtb2	-0.183035	2.60861	0.810446	1	M	6.23631	5.49151
Acaa1a	1.79021	2.40162	0.0183498	0.187483	M	2.26775	7.87913
Acaa1b	0.291079	-0.015658	1	1	M	0.680325	0.835665
Acaa2	1.36806	2.87396	0.0630951	0.446338	M	3.96856	10.2667
Acaca	-1.25299	5.65971	0.0634254	0.447978	M	70.8672	29.7258
Acacb	0.306691	1.25537	0.77773	1	M	1.92759	2.38761
Acad10	0.165238	3.49765	0.825769	1	M	10.4317	11.6993
Acad11	0.390965	3.97178	0.573626	1	M	13.3797	17.549
Acad12	0.548089	-0.102459	0.822492	1	M	0.566938	0.835665
Acad8	-0.0187258	1.94026	1	1	M	3.6284	3.58142
Acad9	0.657391	2.45623	0.394662	1	M	4.08195	6.44656
Acadl	0.606457	2.12962	0.438288	1	M	3.28824	5.01399
Acadm	1.27659	2.3982	0.0870806	0.557394	M	2.94808	7.16284
Acads	1.47624	1.11311	0.109695	0.63316	M	1.02049	2.86514
Acadsb	0.836065	3.83565	0.231336	0.926159	M	10.0915	18.0265
Acadvl	-0.125649	3.93902	0.869454	1	M	15.7609	14.4451
Acan	0.981736	0.807502	0.366588	1	M	1.02049	2.02947
Acap1	-0.910173	3.2001	0.202305	0.860851	M	11.6789	6.2078
Acap2	1.1009	3.19199	0.126284	0.685247	M	5.66938	12.1768
Acap3	0.364871	3.49227	0.60989	1	M	9.63794	12.4156
Acat1	0.905529	3.76352	0.194089	0.841978	M	9.29778	17.4296
Acat2	0.262039	2.48326	0.76046	1	M	4.87566	5.84966
Acat3	0.785613	-0.517452	0.769726	1	M	0.340163	0.596904
Acbd3	-0.0710544	5.67322	0.9203	1	M	52.0449	49.543
Acbd4	1.38206	0.902576	0.174456	0.811873	M	0.9071	2.38761
Acbd5	0.509918	5.0594	0.45138	1	M	27.3264	38.9181
Acbd6	0.426889	7.42692	0.516622	1	M	146.61	197.098
Acbd7	-0.497892	-0.297835	0.7999	1	M	0.680325	0.477523
Accs	2.14286	0.224389	0.083497	0.543172	M	0.340163	1.55195
Accsl	-3.13737	-1.78287	1	1	M	0.113388	0
Acd	0.119422	5.07486	0.862306	1	M	32.0887	34.8592
Ace	-1.78593	8.0266	0.00812136	0.102241	M	403.886	117.113
Ace2	1.2612	-0.293705	0.442579	1	M	0.340163	0.835665
Acer1	4.12291	-1.51737	0.52381	1	M	0	0.238761
Acer2	-0.378756	1.9806	0.672668	1	M	4.19534	3.22328
Acer3	0.2804	3.54281	0.700074	1	M	10.3183	12.535
Acin1	-0.278674	7.70706	0.671707	1	M	228.816	188.622
Ackr1	0	-2.10399	1	1	M	0	0
Ackr2	2.00646	-0.292328	0.191276	0.835653	M	0.226775	0.955046
Ackr3	1.63849	0.710261	0.122481	0.679254	M	0.680325	2.14885
Ackr4	1.94353	-0.931693	0.430642	1	M	0.113388	0.477523
Acly	0.0953117	4.59409	0.899772	1	M	23.1311	24.7118
Acmsd	-3.13737	-1.78287	1	1	M	0.113388	0
Acnat1	2.9956	0.364116	0.0167826	0.175272	M	0.226775	1.91009
Acnat2	2.9956	0.364116	0.0167826	0.175272	M	0.226775	1.91009
Aco1	1.24776	1.63202	0.144797	0.743329	M	1.70081	4.05895
Aco2	0.389484	7.25296	0.554296	1	M	131.87	172.744
Acod1	0	-2.10399	1	1	M	0	0
Acot1	1.02793	-0.780462	0.726708	1	M	0.226775	0.477523
Acot11	1.51876	0.990891	0.107412	0.626669	M	0.9071	2.62638
Acot12	-6.78383	0.0572069	0.00199604	0.0335101	M	1.58743	0
Acot13	0.905166	0.0687283	0.542974	1	M	0.566938	1.07443
Acot2	2.00646	-0.292328	0.191276	0.835653	M	0.226775	0.955046
Acot3	0	-2.10399	1	1	M	0	0
Acot4	-3.13737	-1.78287	1	1	M	0.113388	0
Acot5	3.20342	-1.78122	1	1	M	0	0.119381
Acot6	0	-2.10399	1	1	M	0	0
Acot7	0.095194	9.54682	0.884519	1	M	723.072	772.393
Acot8	0.27134	4.64401	0.692134	1	M	22.4507	27.0994
Acox1	-0.832714	4.60429	0.221968	0.905273	M	30.8414	17.3102
Acox2	-4.60867	-1.29894	0.285714	0.985287	M	0.340163	0
Acox3	0.399314	5.57152	0.550016	1	M	40.8195	53.8407
Acoxl	0.0660534	-1.51899	1	1	M	0.113388	0.119381
Acp1	0.397323	6.01335	0.551286	1	M	55.5599	73.1804
Acp2	1.34553	4.57958	0.0503107	0.389998	M	13.3797	34.0235
Acp4	-0.0751339	4.8229	0.91436	1	M	28.8004	27.3382
Acp5	-0.363472	1.10346	0.672306	1	M	2.15436	1.67133
Acp6	-0.338979	1.62164	0.761112	1	M	3.17485	2.507
Acp7	1.02793	-0.780462	0.726708	1	M	0.226775	0.477523
Acpp	1.05058	-0.101131	0.497906	1	M	0.45355	0.955046
Acr	-0.581852	7.73617	0.376693	1	M	255.349	170.595
Acrbp	-0.144064	9.06644	0.826066	1	M	562.629	509.159
Acsbg1	0.870011	4.7546	0.199297	0.854339	M	18.9357	34.6204
Acsf2	0.470519	1.68062	0.55548	1	M	2.49453	3.46204
Acsf3	0.0101714	4.57208	1	1	M	23.4712	23.6374
Acsl3	0.417293	3.64863	0.561904	1	M	10.545	14.0869
Acsl4	2.29047	1.3674	0.012692	0.142291	M	0.793713	3.93956
Acsl5	-0.900538	3.96856	0.188716	0.835653	M	20.0696	10.7443
Acsl6	0.402183	7.30888	0.541358	1	M	136.405	180.265
Acsm1	0	-2.10399	1	1	M	0	0
Acsm2	0	-2.10399	1	1	M	0	0
Acsm3	0.985538	-1.29578	1	1	M	0.113388	0.238761
Acsm4	0	-2.10399	1	1	M	0	0
Acsm5	6.75152	-0.00782587	0.00286389	0.0444157	M	0	1.55195
Acss1	0.345685	1.73134	0.669495	1	M	2.7213	3.46204
Acss2	-0.180166	5.76416	0.788639	1	M	57.4875	50.7368
Acss2os	-1.19887	-0.646613	0.521739	1	M	0.566938	0.238761
Acss3	1.45076	-0.19353	0.333681	1	M	0.340163	0.955046
Acta1	6.22695	-0.397073	0.0140787	0.153153	M	0	1.07443
Acta2	-0.652306	4.75268	0.336748	1	M	32.6556	20.7723
Actb	-0.333707	8.4725	0.610984	1	M	395.836	314.091
Actbl2	-4.05297	-1.5206	0.52381	1	M	0.226775	0
Actc1	3.20342	-1.78122	1	1	M	0	0.119381
Actg1	0.661642	9.92918	0.313666	1	M	755.048	1194.4
Actl6a	-0.248738	6.61571	0.708442	1	M	106.244	89.4162
Actl6b	0.627031	-0.93321	1	1	M	0.226775	0.358142
Actl7b	-0.454883	9.28148	0.487814	1	M	719.331	524.798
Actl9	-1.77387	7.39968	0.0086864	0.10745	M	260.905	76.2843
Actn1	-1.44779	2.92769	0.0488737	0.383038	M	10.7718	3.93956
Actn2	-1.04931	1.67045	0.194613	0.843287	M	3.96856	1.91009
Actn3	-0.187301	1.10442	0.832809	1	M	2.04098	1.79071
Actn4	-0.275112	4.63091	0.689418	1	M	26.8728	22.2048
Actr10	-0.104595	8.18527	0.873764	1	M	301.384	280.306
Actr1a	0.129859	8.29801	0.84339	1	M	300.364	328.655
Actr1b	0.585642	5.10997	0.384434	1	M	27.4398	41.1864
Actr2	0.910423	5.20128	0.175837	0.815719	M	25.3988	47.7523
Actr3	1.31919	5.21246	0.0516696	0.397443	M	21.0901	52.6469
Actr3b	0.597866	0.59902	0.662736	1	M	1.02049	1.55195
Actr5	0.0153752	2.56857	1	1	M	5.66938	5.73028
Actr6	0.765535	4.1806	0.26469	0.984391	M	13.2663	22.563
Actr8	0.274384	5.5911	0.682779	1	M	43.4274	52.5275
Acvr1	-0.450976	0.594516	0.662736	1	M	1.47404	1.07443
Acvr1b	0.295884	2.46844	0.724796	1	M	4.76228	5.84966
Acvr1c	-2.37537	-0.648068	0.186957	0.832137	M	0.680325	0.119381
Acvr2a	0.509951	5.15711	0.446016	1	M	29.254	41.6639
Acvr2b	0.372251	1.85293	0.644988	1	M	2.94808	3.82018
Acvrl1	2.24552	1.93272	0.00824268	0.103197	M	1.24726	5.96904
Acy1	1.42042	0.760262	0.177284	0.818757	M	0.793713	2.14885
Acy3	1.09767	3.37446	0.126729	0.68701	M	6.46309	13.8482
Acyp1	0.488691	7.33574	0.458091	1	M	134.251	188.383
Acyp2	0.361282	3.17573	0.6197	1	M	7.71035	9.9086
Ada	-0.715965	-0.198935	0.63315	1	M	0.793713	0.477523
Adad1	0.391468	8.4876	0.55076	1	M	310.342	407.088
Adad2	-0.497614	3.52021	0.483017	1	M	13.153	9.3117
Adal	-0.383416	1.82397	0.688667	1	M	3.74179	2.86514
Adam10	0.365154	3.15702	0.615257	1	M	7.59697	9.78922
Adam11	-0.150356	3.41802	0.833976	1	M	10.9986	9.9086
Adam12	3.29299	1.07905	0.00171843	0.0299159	M	0.340163	3.46204
Adam15	0.121702	5.41712	0.858017	1	M	40.7061	44.2903
Adam17	0.321905	3.85952	0.651384	1	M	12.6994	15.8776
Adam18	0.143614	7.11275	0.828196	1	M	131.303	145.048
Adam19	2.69876	2.62957	0.000858637	0.0169756	M	1.58743	10.3861
Adam1b	0.475453	7.44261	0.470146	1	M	145.363	202.112
Adam2	0.220557	8.68285	0.736615	1	M	379.395	442.067
Adam20	0.00789019	6.29592	0.992204	1	M	78.124	78.5525
Adam21	-2.46509	4.18655	0.00064132	0.0132566	M	30.3879	5.49151
Adam22	-0.81742	3.24555	0.249382	0.965261	M	11.7923	6.68532
Adam23	2.66853	1.99984	0.0020415	0.0341542	M	1.02049	6.56594
Adam25	0.180352	5.52939	0.78655	1	M	43.0873	48.8267
Adam26a	-1.75778	5.60488	0.0101873	0.119593	M	74.7224	22.0854
Adam26b	-0.786785	4.10177	0.256668	0.974713	M	21.4302	12.4156
Adam28	0	-2.10399	1	1	M	0	0
Adam3	-0.158703	10.1341	0.808388	1	M	1185.24	1061.77
Adam30	0.381574	6.86802	0.562423	1	M	101.255	131.916
Adam32	0.0944108	9.32963	0.885523	1	M	622.157	664.234
Adam33	3.31535	0.606909	0.00583707	0.0789481	M	0.226775	2.38761
Adam34	-0.58693	4.2069	0.391896	1	M	21.8838	14.5645
Adam39	-0.0252193	5.46176	0.972292	1	M	44.2211	43.4546
Adam5	0.0632291	10.1315	0.923122	1	M	1096.91	1146.06
Adam7	0	-2.10399	1	1	M	0	0
Adam8	1.58255	1.03312	0.0915827	0.575836	M	0.9071	2.74576
Adam9	1.02017	3.29835	0.156062	0.773879	M	6.3497	12.8931
Adamdec1	-4.05297	-1.5206	0.52381	1	M	0.226775	0
Adamts1	1.96966	3.39766	0.00677975	0.0888953	M	4.19534	16.4745
Adamts10	1.09197	2.68695	0.138676	0.723981	M	3.96856	8.47603
Adamts12	-0.89879	-0.405491	0.585507	1	M	0.680325	0.358142
Adamts13	0	-2.10399	1	1	M	0	0
Adamts14	4.30092	0.608037	0.00133434	0.0245053	M	0.113388	2.507
Adamts15	2.26556	1.52331	0.011508	0.131481	M	0.9071	4.41709
Adamts16	-5.32178	-0.937756	0.0942029	0.576028	M	0.566938	0
Adamts17	0.991117	4.43059	0.148671	0.748325	M	14.2868	28.4126
Adamts18	1.54263	-1.10236	0.658385	1	M	0.113388	0.358142
Adamts19	-0.591985	-0.018265	0.670342	1	M	0.9071	0.596904
Adamts2	1.84605	3.14116	0.0118082	0.13448	M	3.74179	13.49
Adamts20	-2.0065	1.24345	0.0275183	0.254819	M	3.40163	0.835665
Adamts3	-0.0766848	0.41927	1	1	M	1.13388	1.07443
Adamts4	1.16654	1.4882	0.181118	0.826713	M	1.58743	3.58142
Adamts5	2.38928	4.49253	0.000792814	0.015843	M	7.14342	37.4856
Adamts6	0.486407	1.42263	0.609666	1	M	2.04098	2.86514
Adamts7	1.34175	2.59381	0.0706593	0.486379	M	3.28824	8.35665
Adamts8	0.627031	-0.93321	1	1	M	0.226775	0.358142
Adamts9	-0.469431	1.0634	0.587191	1	M	2.15436	1.55195
Adamtsl1	0.408942	1.45321	0.676811	1	M	2.15436	2.86514
Adamtsl2	0.737385	1.48567	0.410207	1	M	1.92759	3.22328
Adamtsl3	-1.40524	-1.10546	0.658385	1	M	0.340163	0.119381
Adamtsl4	0.968754	1.45662	0.271828	0.985287	M	1.70081	3.34266
Adamtsl5	0.0740277	2.02587	0.953267	1	M	3.74179	3.93956
Adap1	0.150596	2.76777	0.858156	1	M	6.23631	6.92408
Adap2	2.96015	0.813877	0.00585897	0.0790841	M	0.340163	2.74576
Adar	0.153391	2.7176	0.881549	1	M	6.00954	6.68532
Adarb1	-0.748393	4.77007	0.268	0.985287	M	33.9029	20.1753
Adarb2	1.02793	-0.780462	0.726708	1	M	0.226775	0.477523
Adat1	0.784872	2.53216	0.288451	0.991418	M	4.08195	7.04346
Adat3	1.20994	4.57826	0.0778315	0.517723	M	14.2868	33.0685
Adck1	0.572602	3.43327	0.416187	1	M	8.50407	12.6544
Adck2	0.276863	2.12703	0.741364	1	M	3.74179	4.53647
Adck5	0.52274	2.55883	0.504734	1	M	4.64889	6.68532
Adcy1	0.00717301	2.38792	1	1	M	4.98905	5.01399
Adcy2	-0.328842	-0.645156	1	1	M	0.45355	0.358142
Adcy3	0.457576	2.34279	0.564915	1	M	4.08195	5.6109
Adcy4	2.51421	-0.640783	0.186957	0.832137	M	0.113388	0.716284
Adcy5	1.40147	2.81518	0.0575126	0.41645	M	3.74179	9.9086
Adcy6	0.930926	4.07603	0.173666	0.811107	M	11.4521	21.8467
Adcy7	1.62886	3.99995	0.0201827	0.201969	M	7.71035	23.8761
Adcy8	0	-2.10399	1	1	M	0	0
Adcy9	0.827104	1.18607	0.371253	1	M	1.47404	2.62638
Adcyap1	0	-2.10399	1	1	M	0	0
Add1	0.670216	4.21636	0.329995	1	M	14.1734	22.563
Add2	-0.708007	0.979843	0.421156	1	M	2.15436	1.31319
Add3	0.366126	5.62669	0.582509	1	M	42.9739	55.3927
Adgb	0.210589	7.20074	0.749579	1	M	136.178	157.583
Adgra1	-4.05297	-1.5206	0.52381	1	M	0.226775	0
Adgra2	1.46978	0.6024	0.180372	0.825618	M	0.680325	1.91009
Adgra3	0.251866	2.30751	0.769341	1	M	4.30873	5.13337
Adgrb1	-0.507402	1.35236	0.579401	1	M	2.7213	1.91009
Adgrb2	0.45747	0.985868	0.732196	1	M	1.47404	2.02947
Adgrb3	1.23102	0.808565	0.241983	0.948868	M	0.9071	2.14885
Adgrd1	1.19709	1.68531	0.159401	0.775745	M	1.8142	4.17833
Adgre1	2.14152	3.81079	0.00306674	0.0469532	M	5.10244	22.563
Adgre4	1.94353	-0.931693	0.430642	1	M	0.113388	0.477523
Adgre5	1.81942	2.35272	0.0169291	0.176382	M	2.15436	7.64037
Adgrf1	0	-2.10399	1	1	M	0	0
Adgrf2	3.20342	-1.78122	1	1	M	0	0.119381
Adgrf3	0.517409	5.26853	0.44025	1	M	31.5217	45.1259
Adgrf4	-3.13737	-1.78287	1	1	M	0.113388	0
Adgrf5	1.31538	0.292859	0.283653	0.985287	M	0.566938	1.43257
Adgrg1	1.62272	4.03661	0.0206372	0.205973	M	7.93713	24.4731
Adgrg2	0.472235	-0.643699	1	1	M	0.340163	0.477523
Adgrg3	0.785613	-0.517452	0.769726	1	M	0.340163	0.596904
Adgrg5	7.13539	0.29896	0.000726851	0.0147456	M	0	2.02947
Adgrg6	3.20342	-1.78122	1	1	M	0	0.119381
Adgrg7	-0.849546	-1.29737	1	1	M	0.226775	0.119381
Adgrl1	-0.59899	4.26001	0.379296	1	M	22.7909	15.042
Adgrl2	0.436669	4.95646	0.51585	1	M	26.1925	35.4561
Adgrl3	-1.54751	4.36777	0.0254126	0.239743	M	30.3879	10.3861
Adgrl4	-0.849546	-1.29737	1	1	M	0.226775	0.119381
Adgrv1	0.607058	4.61725	0.375483	1	M	19.2759	29.3677
Adh1	1.49791	0.809627	0.14853	0.748273	M	0.793713	2.26823
Adh4	-0.150983	3.07444	0.860345	1	M	8.61745	7.75975
Adh5	1.22076	2.64799	0.0986947	0.593982	M	3.6284	8.47603
Adh6-ps1	0	-2.10399	1	1	M	0	0
Adh6a	-3.13737	-1.78287	1	1	M	0.113388	0
Adh7	0.515963	4.46797	0.447817	1	M	18.0286	25.7862
Adhfe1	0.240685	0.289202	1	1	M	0.9071	1.07443
Adi1	0.968754	1.45662	0.271828	0.985287	M	1.70081	3.34266
Adipoq	-0.183035	2.60861	0.810446	1	M	6.23631	5.49151
Adipor1	0.801658	6.34147	0.228113	0.91796	M	58.9615	102.787
Adipor2	0.75723	4.70885	0.266051	0.984391	M	19.2759	32.5909
Adk	-0.12238	2.41852	0.891888	1	M	5.32921	4.89461
Adm	2.7325	-0.514591	0.12496	0.68052	M	0.113388	0.835665
Adm2	0	-2.10399	1	1	M	0	0
Adnp	1.5041	0.148591	0.23879	0.940925	M	0.45355	1.31319
Adnp2	0.898033	4.79809	0.185964	0.832137	M	19.2759	35.9336
Ado	0.709416	5.24872	0.292723	0.999002	M	28.687	46.9166
Adora1	-0.618495	0.537317	0.545915	1	M	1.47404	0.955046
Adora2a	-0.485757	-0.934726	1	1	M	0.340163	0.238761
Adora2b	-0.184514	-0.197585	1	1	M	0.680325	0.596904
Adora3	-5.57879	-0.786402	0.0565217	0.41645	M	0.680325	0
Adpgk	0.760261	2.51729	0.320336	1	M	4.08195	6.92408
Adprh	0.494718	4.10118	0.478165	1	M	14.0601	19.8172
Adprhl1	0	-2.10399	1	1	M	0	0
Adprhl2	0.376664	1.29058	0.71239	1	M	1.92759	2.507
Adprm	0.657017	2.20507	0.398232	1	M	3.40163	5.37213
Adra1a	-0.849546	-1.29737	1	1	M	0.226775	0.119381
Adra1b	-0.485757	-0.934726	1	1	M	0.340163	0.238761
Adra1d	-5.98626	-0.524591	0.0219002	0.213334	M	0.9071	0
Adra2a	0.472235	-0.643699	1	1	M	0.340163	0.477523
Adra2b	3.20342	-1.78122	1	1	M	0	0.119381
Adra2c	4.12291	-1.51737	0.52381	1	M	0	0.238761
Adrb1	1.5357	0.42517	0.183672	0.832137	M	0.566938	1.67133
Adrb3	5.0809	-1.10081	0.161491	0.775745	M	0	0.477523
Adrm1	-0.151391	6.13254	0.818294	1	M	73.5885	66.2563
Adsl	0.619066	4.29529	0.370563	1	M	15.3073	23.518
Adss	0.325191	6.90572	0.622223	1	M	106.244	133.11
Adssl1	1.62005	2.74258	0.0293632	0.26672	M	3.17485	9.78922
Aebp1	1.74122	3.46696	0.0156947	0.166745	M	4.98905	16.7133
Aebp2	0.896033	4.62728	0.18663	0.832137	M	17.1215	31.8747
Aen	-0.140414	2.86047	0.864681	1	M	7.37019	6.68532
Aes	1.03841	3.88425	0.137208	0.721934	M	9.52455	19.5784
AF067061	0	-2.10399	1	1	M	0	0
AF067063	3.20342	-1.78122	1	1	M	0	0.119381
AF357355	0	-2.10399	1	1	M	0	0
AF357359	0.985538	-1.29578	1	1	M	0.113388	0.238761
AF357399	4.12291	-1.51737	0.52381	1	M	0	0.238761
AF357425	0	-2.10399	1	1	M	0	0
AF357426	0	-2.10399	1	1	M	0	0
AF366264	-1.21776	4.81029	0.0748759	0.504409	M	38.8919	16.7133
AF529169	0	-2.10399	1	1	M	0	0
Afap1l1	0.300339	2.62663	0.721195	1	M	5.32921	6.56594
Afap1l2	0.0713364	-0.781948	1	1	M	0.340163	0.358142
Afdn	-0.232785	5.26825	0.730957	1	M	41.3865	35.2173
Aff1	1.57913	2.24781	0.0404197	0.330094	M	2.26775	6.8047
Aff3	-1.60852	1.76829	0.0470814	0.371424	M	4.76228	1.55195
Aff4	0.413795	6.56828	0.531308	1	M	81.1855	108.159
Afg1l	1.19511	2.11452	0.121234	0.676244	M	2.49453	5.73028
Afg3l1	-1.07655	3.93458	0.121809	0.678454	M	20.4098	9.66984
Afg3l2	0.488128	5.54036	0.463005	1	M	38.5518	54.0795
Afm	-2.53271	2.6721	0.0011363	0.0214575	M	10.4317	1.79071
Afmid	-0.2459	1.21651	0.84052	1	M	2.26775	1.91009
Afp	-4.05297	-1.5206	0.52381	1	M	0.226775	0
Aftph	0.559387	6.74454	0.397721	1	M	86.5147	127.499
Aga	0.690395	1.10925	0.467852	1	M	1.47404	2.38761
Agap1	-2.00557	3.95917	0.00472774	0.0662892	M	24.4917	6.08842
Agap2	2.20062	1.29964	0.0171989	0.17831	M	0.793713	3.7008
Agap3	0.00391634	4.58954	1	1	M	23.8114	23.8761
Agbl1	-4.01753	0.47083	0.00229484	0.0372151	M	2.15436	0.119381
Agbl2	0.575147	6.63192	0.383977	1	M	79.4847	118.426
Agbl3	-0.149349	6.3319	0.823998	1	M	84.4737	76.1649
Agbl4	0.200378	6.25275	0.762514	1	M	70.7538	81.2983
Agbl5	0.0271837	9.92046	0.96704	1	M	959.712	977.967
Ager	-0.33468	0.0648839	0.840166	1	M	0.9071	0.716284
Agfg1	0.265755	7.43173	0.686469	1	M	156.588	188.263
Agfg2	0.0740097	1.94096	0.950626	1	M	3.51501	3.7008
Aggf1	1.04453	5.11996	0.122215	0.679254	M	22.5641	46.5585
Agk	0.256358	2.27317	0.764237	1	M	4.19534	5.01399
Agl	0.098349	2.83945	0.890731	1	M	6.68987	7.16284
Agmat	5.86987	-0.639323	0.0347826	0.29876	M	0	0.835665
Agmo	2.58419	0.0725765	0.0536329	0.405739	M	0.226775	1.43257
Ago1	-0.0511116	2.79035	0.971498	1	M	6.80325	6.56594
Ago2	0.425605	2.6943	0.571582	1	M	5.32921	7.16284
Ago3	0.508791	2.29254	0.518754	1	M	3.85518	5.49151
Ago4	0.0742332	3.8741	0.931734	1	M	14.0601	14.8032
Agpat1	0.0332751	8.50907	0.960003	1	M	359.892	368.29
Agpat3	-0.352679	8.17925	0.591133	1	M	324.855	254.4
Agpat4	-0.402588	-0.105113	0.822492	1	M	0.793713	0.596904
Agpat5	0.163155	2.55567	0.868265	1	M	5.32921	5.96904
Agps	0.48846	3.0707	0.494757	1	M	6.80325	9.55046
Agr2	0	-2.10399	1	1	M	0	0
Agr3	0.151288	1.25446	1	1	M	2.04098	2.26823
Agrn	-0.413961	3.03156	0.586377	1	M	9.071	6.8047
Agrp	0	-2.10399	1	1	M	0	0
Agt	0.950541	4.04582	0.164487	0.785838	M	11.112	21.4885
Agtpbp1	-0.225882	7.88218	0.731124	1	M	254.101	217.273
Agtr1a	-0.367024	4.35537	0.594293	1	M	22.7909	17.6684
Agtr1b	0.385434	-0.402688	1	1	M	0.45355	0.596904
Agtr2	3.20342	-1.78122	1	1	M	0	0.119381
Agtrap	0.556898	5.07504	0.407154	1	M	27.0996	39.8732
Agxt	0	-2.10399	1	1	M	0	0
Agxt2	0	-2.10399	1	1	M	0	0
Ahctf1	0.012882	8.16559	0.98501	1	M	285.623	288.185
Ahcy	0.633661	4.80727	0.34944	1	M	21.7704	33.7848
Ahcyl1	0.793958	5.65205	0.235	0.93343	M	36.6242	63.5106
Ahcyl2	0.201183	7.00903	0.760782	1	M	119.624	137.527
Ahdc1	-0.0624373	6.7415	0.925649	1	M	109.079	104.458
Ahi1	0.343135	7.86903	0.601519	1	M	205.912	261.205
Ahr	1.46978	0.6024	0.180372	0.825618	M	0.680325	1.91009
Ahrr	1.2612	-0.293705	0.442579	1	M	0.340163	0.835665
Ahsa1	0.994599	5.83859	0.135782	0.717105	M	38.0982	75.9262
Ahsa2	0.612467	3.23303	0.392109	1	M	7.2568	11.1024
Ahsg	4.12291	-1.51737	0.52381	1	M	0	0.238761
AI115009	0	-2.10399	1	1	M	0	0
AI182371	1.36818	0.0700106	0.305221	1	M	0.45355	1.19381
AI197445	0	-2.10399	1	1	M	0	0
AI314180	0.0398065	5.46064	0.953835	1	M	43.2007	44.4096
AI314278	3.20342	-1.78122	1	1	M	0	0.119381
AI413582	0.468887	2.42359	0.554174	1	M	4.30873	5.96904
AI427809	4.68	-1.2942	0.285714	0.985287	M	0	0.358142
AI429214	0.651357	5.99142	0.327257	1	M	49.3236	77.4781
AI450353	3.20342	-1.78122	1	1	M	0	0.119381
AI463170	0	-2.10399	1	1	M	0	0
AI464131	0.712057	3.88096	0.309472	1	M	10.9986	18.0265
AI467606	0.392569	0.852139	0.804303	1	M	1.36065	1.79071
AI506816	0	-2.10399	1	1	M	0	0
AI593442	-6.78383	0.0572069	0.00199604	0.0335101	M	1.58743	0
AI597479	0.658867	4.63151	0.331693	1	M	19.0491	30.0839
AI606473	0	-2.10399	1	1	M	0	0
AI646519	-4.60867	-1.29894	0.285714	0.985287	M	0.340163	0
AI661453	0.447891	0.652889	0.779001	1	M	1.13388	1.55195
AI662270	6.95619	0.153637	0.00140897	0.0253725	M	0	1.79071
AI837181	0.458998	5.83384	0.490466	1	M	47.8495	65.7788
AI839979	5.0809	-1.10081	0.161491	0.775745	M	0	0.477523
AI846148	-0.143106	5.7208	0.831339	1	M	55.1063	49.9012
AI847159	-0.849546	-1.29737	1	1	M	0.226775	0.119381
AI854703	0.291079	-0.015658	1	1	M	0.680325	0.835665
AI987944	0.359227	5.9228	0.588526	1	M	52.952	67.9276
Aicda	0	-2.10399	1	1	M	0	0
Aida	0.605255	3.9954	0.380652	1	M	12.4726	18.9815
Aif1l	0.652556	0.75703	0.597593	1	M	1.13388	1.79071
Aifm1	-0.0587324	2.00408	1	1	M	3.85518	3.7008
Aifm2	0.854726	5.18449	0.203343	0.863343	M	25.739	46.5585
Aifm3	-0.22428	1.84856	0.843823	1	M	3.6284	3.1039
Aig1	0.744939	0.80644	0.521385	1	M	1.13388	1.91009
Aim2	5.86987	-0.639323	0.0347826	0.29876	M	0	0.835665
Aimp1	0.443535	5.56851	0.50625	1	M	40.0258	54.4376
Aimp2	0.380879	4.15766	0.590253	1	M	15.3073	19.9366
Aip	0.618355	3.63723	0.382876	1	M	9.63794	14.8032
Aipl1	-1.67396	-0.406892	0.266667	0.984391	M	0.793713	0.238761
Aire	-2.31657	-0.0221718	0.0729734	0.496328	M	1.24726	0.238761
Airn	4.12291	-1.51737	0.52381	1	M	0	0.238761
Ajap1	3.20342	-1.78122	1	1	M	0	0.119381
Ajuba	0.515693	1.87708	0.515523	1	M	2.83469	4.05895
Ak1	-0.62416	7.23144	0.344	1	M	181.987	118.068
Ak2	0.276786	6.97564	0.674949	1	M	113.614	137.646
Ak3	0.546445	4.18752	0.427503	1	M	14.627	21.3692
Ak4	-0.611055	2.68495	0.418362	1	M	7.48358	4.89461
Ak5	0.593974	1.32586	0.526087	1	M	1.8142	2.74576
Ak6	1.1328	4.29204	0.0981392	0.591228	M	12.1325	26.6219
Ak7	0.0324843	7.05187	0.962049	1	M	130.963	133.945
Ak8	0.0212252	8.12149	0.974868	1	M	276.212	280.306
Akain1	0	-2.10399	1	1	M	0	0
Akap10	-0.645924	6.01229	0.331918	1	M	78.4642	50.1399
Akap11	0.966633	5.47916	0.148873	0.749177	M	30.0477	58.7353
Akap12	-1.35372	10.82	0.041799	0.33965	M	2598.28	1016.65
Akap13	1.33628	4.40628	0.0512462	0.395599	M	11.9057	30.0839
Akap14	0.347946	4.52573	0.604241	1	M	20.0696	25.5475
Akap17b	0.0737322	1.06634	1	1	M	1.8142	1.91009
Akap2	0	-2.10399	1	1	M	0	0
Akap5	-0.885935	-0.783434	0.726708	1	M	0.45355	0.238761
Akap6	-0.308286	2.67458	0.699347	1	M	6.80325	5.49151
Akap7	0.692837	3.86926	0.322759	1	M	10.9986	17.7877
Akap8	0.547769	5.11683	0.416419	1	M	28.0067	40.9476
Akap8l	-0.243646	6.58384	0.712184	1	M	103.75	87.6255
Akap9	0.385142	6.63976	0.560211	1	M	86.2879	112.695
Akip1	1.45991	5.43212	0.0315159	0.280338	M	22.9043	63.033
Akirin1	-0.208361	5.64835	0.755961	1	M	53.5189	46.3197
Akirin2	0.708462	7.22168	0.283195	0.985287	M	113.161	184.921
Akna	-0.206715	6.70399	0.754768	1	M	111.46	96.579
Akp3	1.29064	1.90513	0.119726	0.67015	M	2.04098	5.01399
Akr1a1	1.12986	4.78218	0.0964913	0.585176	M	17.1215	37.4856
Akr1b10	1.14913	0.759185	0.285115	0.985287	M	0.9071	2.02947
Akr1b3	0	-2.10399	1	1	M	0	0
Akr1b7	0	-2.10399	1	1	M	0	0
Akr1b8	0.410139	2.39135	0.609731	1	M	4.30873	5.73028
Akr1c12	5.39428	-0.930174	0.0942029	0.576028	M	0	0.596904
Akr1c13	0.981736	0.807502	0.366588	1	M	1.02049	2.02947
Akr1c14	0.785613	-0.517452	0.769726	1	M	0.340163	0.596904
Akr1c18	-3.13737	-1.78287	1	1	M	0.113388	0
Akr1c20	0.985538	-1.29578	1	1	M	0.113388	0.238761
Akr1c21	3.20342	-1.78122	1	1	M	0	0.119381
Akr1c6	0	-2.10399	1	1	M	0	0
Akr1cl	0.356161	3.29194	0.628027	1	M	8.39068	10.7443
Akr1d1	0	-2.10399	1	1	M	0	0
Akr1e1	0.32827	5.1191	0.62772	1	M	30.6146	38.4406
Akr7a5	0.313375	4.09918	0.658827	1	M	15.0805	18.7428
Akt1	0.401706	5.07821	0.549678	1	M	28.9138	38.2018
Akt1s1	0.655321	4.35873	0.33623	1	M	15.7609	24.8312
Akt2	0.613197	6.07345	0.355202	1	M	53.0654	81.1789
Akt3	0.300453	5.07702	0.655687	1	M	30.0477	37.008
Aktip	-0.756687	4.26268	0.267514	0.985287	M	23.8114	14.0869
Alad	0.108498	3.32338	0.901097	1	M	9.41117	10.1474
Alas1	0.448963	6.67805	0.497213	1	M	86.4013	117.948
Alas2	-1.13225	0.476628	0.26675	0.984391	M	1.58743	0.716284
Alb	0	-2.10399	1	1	M	0	0
Alcam	0.375459	2.04868	0.642691	1	M	3.40163	4.41709
Aldh16a1	0.904442	3.49768	0.197986	0.851089	M	7.71035	14.4451
Aldh18a1	0.67702	1.85512	0.388873	1	M	2.60791	4.17833
Aldh1a1	1.08888	4.65641	0.109342	0.632822	M	15.9876	34.0235
Aldh1a2	0.24809	6.60129	0.707581	1	M	88.5557	105.174
Aldh1a7	-0.724403	0.593391	0.465039	1	M	1.58743	0.955046
Aldh1b1	0.890889	1.22301	0.330406	1	M	1.47404	2.74576
Aldh1l1	-0.420581	1.38526	0.651531	1	M	2.7213	2.02947
Aldh1l2	-3.13737	-1.78287	1	1	M	0.113388	0
Aldh2	1.52753	4.53072	0.0266982	0.24892	M	11.7923	34.0235
Aldh3a1	1.8169	-0.399882	0.266667	0.984391	M	0.226775	0.835665
Aldh3a2	0.144161	4.28135	0.845372	1	M	18.2554	20.1753
Aldh3b1	0.758456	6.2317	0.252056	0.968521	M	55.6733	94.1914
Aldh3b2	0.910904	5.63987	0.173001	0.80861	M	34.4698	64.8237
Aldh3b3	0.155658	1.18231	1	1	M	1.92759	2.14885
Aldh4a1	0.879028	2.42696	0.249307	0.965135	M	3.6284	6.68532
Aldh5a1	1.02793	-0.780462	0.726708	1	M	0.226775	0.477523
Aldh6a1	0.81833	4.13862	0.232379	0.927977	M	12.586	22.2048
Aldh7a1	0.156546	3.38144	0.848254	1	M	9.63794	10.7443
Aldh8a1	0.791904	2.45734	0.300655	1	M	3.85518	6.68532
Aldh9a1	0.478199	5.34055	0.474178	1	M	33.6761	46.9166
Aldoa	-0.411095	7.98093	0.531495	1	M	288.118	216.676
Aldoart1	-0.386876	6.78524	0.558263	1	M	124.726	95.3852
Aldoart2	-1.18962	8.06069	0.0732333	0.497322	M	370.891	162.597
Aldob	1.02793	-0.780462	0.726708	1	M	0.226775	0.477523
Aldoc	0.223366	0.420449	1	1	M	1.02049	1.19381
Alg1	0.142596	2.35665	0.887266	1	M	4.64889	5.13337
Alg10b	0.342493	2.39078	0.676549	1	M	4.42211	5.6109
Alg11	0.620801	3.25977	0.38587	1	M	7.37019	11.3412
Alg12	-1.46499	4.32364	0.0335847	0.295733	M	29.0272	10.5055
Alg13	0.223291	5.90859	0.739852	1	M	55.2197	64.4656
Alg14	1.06628	1.22394	0.240055	0.944165	M	1.36065	2.86514
Alg2	-0.0566146	1.48061	1	1	M	2.60791	2.507
Alg3	0.80988	3.18935	0.27006	0.985287	M	6.46309	11.3412
Alg5	-0.134656	2.08477	0.910267	1	M	4.19534	3.82018
Alg6	0.548089	-0.102459	0.822492	1	M	0.566938	0.835665
Alg8	0.605832	4.50285	0.373264	1	M	17.8018	27.0994
Alg9	0.579888	5.80243	0.382855	1	M	44.5613	66.6145
Alk	-1.88362	0.138516	0.109379	0.632822	M	1.36065	0.358142
Alkal1	0	-2.10399	1	1	M	0	0
Alkal2	-3.13737	-1.78287	1	1	M	0.113388	0
Alkbh1	0.575963	3.37761	0.412266	1	M	8.1639	12.1768
Alkbh2	0.934156	0.29164	0.479207	1	M	0.680325	1.31319
Alkbh3	-0.35311	5.43284	0.597893	1	M	48.1897	37.7243
Alkbh4	0.841552	4.01888	0.221978	0.905273	M	11.4521	20.5335
Alkbh5	0.335088	5.83676	0.615802	1	M	50.3441	63.5106
Alkbh6	0.591609	2.16752	0.449741	1	M	3.40163	5.13337
Alkbh7	0.401246	3.82517	0.568392	1	M	12.0191	15.8776
Alkbh8	1.06363	0.85528	0.315121	1	M	1.02049	2.14885
Alms1	-0.0690199	7.3172	0.917453	1	M	163.051	155.434
Alms1-ps2	-0.849546	-1.29737	1	1	M	0.226775	0.119381
Alox12	-1.40524	-1.10546	0.658385	1	M	0.340163	0.119381
Alox12b	3.08958	-0.290949	0.0577711	0.41645	M	0.113388	1.07443
Alox12e	3.20342	-1.78122	1	1	M	0	0.119381
Alox15	0.855302	0.987877	0.421156	1	M	1.24726	2.26823
Alox5	2.62859	1.19359	0.00666491	0.0877945	M	0.566938	3.58142
Alox8	-3.13737	-1.78287	1	1	M	0.113388	0
Aloxe3	1.2612	-0.293705	0.442579	1	M	0.340163	0.835665
Alpi	6.95619	0.153637	0.00140897	0.0253725	M	0	1.79071
Alpk1	-2.00042	2.42041	0.00954156	0.113818	M	8.1639	2.02947
Alpk2	1.74268	0.294078	0.146765	0.746189	M	0.45355	1.55195
Alpk3	0.0730047	0.066165	1	1	M	0.793713	0.835665
Alppl2	0.345685	1.73134	0.669495	1	M	2.7213	3.46204
Als2	-0.261973	5.19893	0.69722	1	M	39.799	33.1878
Als2cl	1.02844	1.73593	0.226132	0.914829	M	2.04098	4.17833
Als2cr11	0.0536078	7.87933	0.935627	1	M	230.857	239.597
Als2cr12	0.589332	7.34323	0.371217	1	M	129.489	194.829
Alx1	0.707993	4.99442	0.294	1	M	24.0382	39.2763
Alx3	5.65158	-0.777486	0.0565217	0.41645	M	0	0.716284
Alx4	1.02793	-0.780462	0.726708	1	M	0.226775	0.477523
Alyref	0.565536	3.77859	0.419609	1	M	10.8852	16.1164
Alyref2	0.627031	-0.93321	1	1	M	0.226775	0.358142
Amacr	0.695918	0.899478	0.545468	1	M	1.24726	2.02947
Ambn	4.12291	-1.51737	0.52381	1	M	0	0.238761
Ambp	1.04292	-0.401285	0.585507	1	M	0.340163	0.716284
Ambra1	0.698909	5.9598	0.292163	0.997542	M	47.2826	76.7618
Amd1	0	-2.10399	1	1	M	0	0
Amd2	0	-2.10399	1	1	M	0	0
Amdhd1	0	-2.10399	1	1	M	0	0
Amdhd2	0.746353	6.60997	0.260065	0.982362	M	72.7948	122.127
Amelx	0	-2.10399	1	1	M	0	0
Amer1	0.472235	-0.643699	1	1	M	0.340163	0.477523
Amer2	-0.529285	6.22155	0.424497	1	M	87.8753	60.8842
Amer3	1.54263	-1.10236	0.658385	1	M	0.113388	0.358142
Amfr	-0.433305	5.57901	0.516358	1	M	54.6528	40.4701
Amh	-0.145282	-0.0169617	1	1	M	0.793713	0.716284
Amhr2	0.0567347	3.29747	0.959679	1	M	9.41117	9.78922
Amigo1	-0.204145	1.0242	0.824298	1	M	1.92759	1.67133
Amigo2	0.548089	-0.102459	0.822492	1	M	0.566938	0.835665
Amigo3	0.329802	-0.196233	1	1	M	0.566938	0.716284
Ammecr1	0.187904	0.754875	1	1	M	1.36065	1.55195
Ammecr1l	0.581445	7.69936	0.377059	1	M	166.34	248.909
Amn	-3.34605	1.58078	0.000458791	0.0100299	M	4.98905	0.477523
Amn1	-0.0499082	6.29627	0.942913	1	M	79.7114	77.0006
Amot	1.45203	0.947402	0.12613	0.684579	M	0.9071	2.507
Amotl1	-0.925571	6.8946	0.162958	0.780661	M	155.568	81.8952
Amotl2	0.721196	1.22208	0.438358	1	M	1.58743	2.62638
Ampd1	-0.33468	0.0648839	0.840166	1	M	0.9071	0.716284
Ampd2	0.547158	2.95651	0.463906	1	M	6.12293	8.95356
Ampd3	2.50855	1.33481	0.00745943	0.0952261	M	0.680325	3.93956
Amt	-0.153454	2.21668	0.876722	1	M	4.64889	4.17833
Amtn	0	-2.10399	1	1	M	0	0
Amy1	0.963109	1.90299	0.216737	0.894614	M	2.38114	4.65585
Amy2a3	0	-2.10399	1	1	M	0	0
Amy2a4	0	-2.10399	1	1	M	0	0
Amy2a5	0	-2.10399	1	1	M	0	0
Amy2b	0	-2.10399	1	1	M	0	0
Amz1	2.17398	-0.192177	0.137874	0.721934	M	0.226775	1.07443
Amz2	0.0122217	8.19079	0.985802	1	M	290.726	293.199
Anapc1	-0.213758	4.69441	0.753639	1	M	27.5532	23.7568
Anapc10	0.513795	5.17593	0.443312	1	M	29.5941	42.2608
Anapc11	0.470258	5.29182	0.48429	1	M	32.6556	45.2453
Anapc13	0.118637	4.73975	0.86417	1	M	25.3988	27.577
Anapc15	0.210776	4.22482	0.765997	1	M	17.1215	19.8172
Anapc16	-0.210395	3.51586	0.775744	1	M	12.0191	10.3861
Anapc2	0.772499	5.43854	0.248882	0.963982	M	31.8619	54.4376
Anapc4	0.151567	3.94753	0.844771	1	M	14.4002	15.997
Anapc5	-0.109466	6.10289	0.869906	1	M	71.094	65.8982
Anapc7	0.767313	4.15714	0.263149	0.984391	M	13.0396	22.2048
Ang	2.25691	-0.778974	0.282609	0.985287	M	0.113388	0.596904
Ang2	0	-2.10399	1	1	M	0	0
Ang3	0	-2.10399	1	1	M	0	0
Ang4	-4.05297	-1.5206	0.52381	1	M	0.226775	0
Ang5	0	-2.10399	1	1	M	0	0
Ang6	0	-2.10399	1	1	M	0	0
Angel1	-0.329808	8.44713	0.615173	1	M	388.466	309.077
Angel2	0.281055	4.7604	0.686735	1	M	24.2649	29.487
Angpt1	1.94353	-0.931693	0.430642	1	M	0.113388	0.477523
Angpt2	-0.497892	-0.297835	0.7999	1	M	0.680325	0.477523
Angpt4	0.0660534	-1.51899	1	1	M	0.113388	0.119381
Angptl1	3.20342	-1.78122	1	1	M	0	0.119381
Angptl2	0.77781	0.944347	0.479616	1	M	1.24726	2.14885
Angptl3	0	-2.10399	1	1	M	0	0
Angptl4	0.806878	1.60179	0.356891	1	M	2.04098	3.58142
Angptl6	0.905166	0.0687283	0.542974	1	M	0.566938	1.07443
Angptl7	5.65158	-0.777486	0.0565217	0.41645	M	0	0.716284
Angptl8	0.0660534	-1.51899	1	1	M	0.113388	0.119381
Ank	0.765261	0.543033	0.545915	1	M	0.9071	1.55195
Ank1	-6.56362	-0.111738	0.00416566	0.0595999	M	1.36065	0
Ank3	0.658379	3.50272	0.350093	1	M	8.61745	13.6094
Ankar	0.502355	6.6688	0.446887	1	M	84.0202	119.023
Ankdd1b	1.78953	0.810689	0.0837197	0.544154	M	0.680325	2.38761
Ankef1	-1.03562	8.25706	0.117595	0.662941	M	410.916	200.44
Ankfn1	-2.06259	0.58889	0.0456519	0.36241	M	2.04098	0.477523
Ankfy1	1.32777	3.65081	0.057833	0.416632	M	7.03003	17.6684
Ankhd1	-0.107398	6.65704	0.87098	1	M	104.43	96.9372
Ankib1	-0.120261	4.50195	0.86705	1	M	23.3578	21.4885
Ankk1	1.27869	0.485917	0.26675	0.984391	M	0.680325	1.67133
Ankle1	0.293863	0.804317	0.898528	1	M	1.36065	1.67133
Ankle2	0.0826658	5.33164	0.90428	1	M	38.8919	41.1864
Ankmy1	0.579275	6.39602	0.38198	1	M	67.3522	100.638
Ankmy2	1.05837	0.359316	0.394643	1	M	0.680325	1.43257
Ankra2	0.399095	4.62516	0.556384	1	M	21.0901	27.8157
Ankrd1	3.20342	-1.78122	1	1	M	0	0.119381
Ankrd10	0.54256	3.98411	0.432366	1	M	12.6994	18.504
Ankrd11	-0.109492	5.60376	0.870776	1	M	50.2307	46.5585
Ankrd12	0.854313	5.11301	0.202053	0.860851	M	24.4917	44.2903
Ankrd13a	0.348298	8.31354	0.595617	1	M	279.727	356.113
Ankrd13b	-0.506941	1.17854	0.605363	1	M	2.38114	1.67133
Ankrd13c	0.505195	5.5333	0.447175	1	M	38.0982	54.0795
Ankrd13d	1.01058	1.29421	0.261464	0.983723	M	1.47404	2.98452
Ankrd16	0.622193	2.09069	0.42641	1	M	3.17485	4.89461
Ankrd17	0.530664	5.64729	0.426522	1	M	40.8195	58.9741
Ankrd2	4.12291	-1.51737	0.52381	1	M	0	0.238761
Ankrd22	0.366054	2.43832	0.653067	1	M	4.5355	5.84966
Ankrd23	-0.311404	1.8937	0.749699	1	M	3.85518	3.1039
Ankrd24	0.199116	2.0874	0.821578	1	M	3.74179	4.29771
Ankrd26	0.556777	1.60018	0.483994	1	M	2.26775	3.34266
Ankrd27	0.306294	4.59653	0.651747	1	M	21.4302	26.5025
Ankrd28	-0.0948523	5.74971	0.886793	1	M	55.3331	51.8112
Ankrd29	0	-2.10399	1	1	M	0	0
Ankrd33	0	-2.10399	1	1	M	0	0
Ankrd33b	0.526685	0.421629	0.745855	1	M	0.9071	1.31319
Ankrd34a	3.08958	-0.290949	0.0577711	0.41645	M	0.113388	1.07443
Ankrd34b	-3.13737	-1.78287	1	1	M	0.113388	0
Ankrd34c	0	-2.10399	1	1	M	0	0
Ankrd35	3.08958	-0.290949	0.0577711	0.41645	M	0.113388	1.07443
Ankrd36	0.0773229	8.799	0.906368	1	M	433.254	457.109
Ankrd37	2.49618	0.812814	0.0155141	0.165205	M	0.45355	2.62638
Ankrd39	-1.17895	1.13768	0.195166	0.844394	M	2.7213	1.19381
Ankrd40	-0.160562	5.30558	0.811562	1	M	41.4998	37.1274
Ankrd42	0.0162108	8.46227	0.980814	1	M	350.481	354.441
Ankrd44	0.73732	2.68398	0.318426	1	M	4.64889	7.75975
Ankrd45	0.334583	5.85577	0.617282	1	M	51.0244	64.3462
Ankrd46	1.12902	2.19019	0.141526	0.734958	M	2.7213	5.96904
Ankrd49	-0.194897	5.89502	0.770134	1	M	63.2702	55.2733
Ankrd50	0.0477264	2.71663	1	1	M	6.23631	6.44656
Ankrd52	-1.09776	2.60091	0.147151	0.747124	M	7.93713	3.7008
Ankrd54	0.667672	7.96745	0.310519	1	M	193.212	306.928
Ankrd55	1.60881	4.21642	0.021219	0.210854	M	9.071	27.6963
Ankrd6	0.209316	0.540746	1	1	M	1.13388	1.31319
Ankrd60	-0.170444	7.22701	0.79634	1	M	158.402	140.75
Ankrd61	-0.654055	7.38173	0.321256	1	M	203.644	129.409
Ankrd63	-0.212527	0.480109	0.876186	1	M	1.24726	1.07443
Ankrd66	-4.05297	-1.5206	0.52381	1	M	0.226775	0
Ankrd7	-0.836339	6.49781	0.207473	0.872567	M	115.542	64.7044
Anks1	-0.384838	4.32628	0.578161	1	M	22.4507	17.1908
Anks1b	0.724647	2.7099	0.3269	1	M	4.76228	7.87913
Anks3	0.287269	4.32134	0.676297	1	M	17.8018	21.7273
Anks4b	0.981736	0.807502	0.366588	1	M	1.02049	2.02947
Anks6	0.525174	3.26761	0.465778	1	M	7.71035	11.1024
Ankub1	-0.885935	-0.783434	0.726708	1	M	0.45355	0.238761
Ankzf1	1.20589	3.56633	0.0840242	0.544839	M	7.03003	16.2358
Anln	0.458622	4.29351	0.500459	1	M	16.3278	22.4436
Ano1	-0.0667937	3.73449	0.940018	1	M	13.3797	12.7737
Ano10	0.352338	5.79363	0.595404	1	M	48.5299	61.9586
Ano2	-0.556884	0.648453	0.573302	1	M	1.58743	1.07443
Ano3	0.985538	-1.29578	1	1	M	0.113388	0.238761
Ano4	-4.60867	-1.29894	0.285714	0.985287	M	0.340163	0
Ano5	0.379843	2.37496	0.639255	1	M	4.30873	5.6109
Ano6	1.09197	2.68695	0.138676	0.723981	M	3.96856	8.47603
Ano7	-0.328842	-0.645156	1	1	M	0.45355	0.358142
Ano8	3.38532	0.66177	0.00455058	0.0641425	M	0.226775	2.507
Ano9	0.0720568	-0.518881	1	1	M	0.45355	0.477523
Anp32a	1.02331	2.99304	0.162494	0.779259	M	5.10244	10.3861
Anp32b	0.0116722	5.13216	0.988426	1	M	34.6966	34.9786
Anp32e	0.930877	2.22535	0.225552	0.913947	M	3.06146	5.84966
Anpep	1.25171	0.656218	0.253153	0.969135	M	0.793713	1.91009
Antxr1	2.29047	1.3674	0.012692	0.142291	M	0.793713	3.93956
Antxr2	-0.462791	4.37055	0.499533	1	M	23.698	17.1908
Anxa1	1.86373	2.38589	0.0144538	0.155597	M	2.15436	7.87913
Anxa10	0	-2.10399	1	1	M	0	0
Anxa11	-1.07569	4.46917	0.116203	0.657213	M	29.7075	14.0869
Anxa13	0.0660534	-1.51899	1	1	M	0.113388	0.119381
Anxa2	0.893299	6.07922	0.179358	0.82398	M	47.1692	87.6255
Anxa3	1.86106	4.3537	0.00792873	0.0999821	M	8.73084	31.7553
Anxa4	1.2801	1.97134	0.100074	0.596934	M	2.15436	5.25275
Anxa5	2.31208	3.67162	0.00160342	0.0282162	M	4.19534	20.8916
Anxa6	1.719	3.71361	0.0165559	0.174025	M	6.00954	19.8172
Anxa7	0.771929	4.04399	0.263236	0.984391	M	12.0191	20.5335
Anxa8	0.985538	-1.29578	1	1	M	0.113388	0.238761
Anxa9	-1.49455	0.889158	0.104627	0.616312	M	2.38114	0.835665
Aoah	2.05438	1.19171	0.0275183	0.254819	M	0.793713	3.34266
Aoc1	-3.13737	-1.78287	1	1	M	0.113388	0
Aoc2	0.0235786	1.82692	1	1	M	3.28824	3.34266
Aoc3	1.44814	2.46231	0.0528233	0.403239	M	2.83469	7.75975
Aox1	1.31532	2.95232	0.0731017	0.496973	M	4.30873	10.7443
Aox2	-0.591985	-0.018265	0.670342	1	M	0.9071	0.596904
Aox4	-0.227401	2.04399	0.816944	1	M	4.19534	3.58142
Ap1ar	0.219343	3.05803	0.766161	1	M	7.48358	8.71479
Ap1b1	1.0238	5.72831	0.126427	0.6857	M	34.81	70.7928
Ap1g1	0.309727	5.0821	0.645879	1	M	30.0477	37.2468
Ap1g2	1.62142	2.79248	0.0289387	0.264343	M	3.28824	10.1474
Ap1m1	0.345027	8.54336	0.598892	1	M	328.484	417.236
Ap1m2	0.954658	0.484755	0.431875	1	M	0.793713	1.55195
Ap1s1	1.30422	3.0165	0.0750256	0.504968	M	4.5355	11.2218
Ap1s2	0.801707	3.96537	0.243902	0.952812	M	11.2254	19.5784
Ap1s3	0.359291	0.482432	0.876186	1	M	1.02049	1.31319
Ap2a1	-0.789232	8.07728	0.23125	0.926018	M	341.863	197.814
Ap2a2	-0.488524	6.12243	0.462282	1	M	81.0721	57.7803
Ap2b1	-0.230978	9.15633	0.724424	1	M	615.921	524.798
Ap2m1	0.00155106	5.12244	1	1	M	34.5832	34.6204
Ap2s1	0.443539	6.62691	0.501443	1	M	83.5666	113.65
Ap3b1	0.169885	7.74679	0.796352	1	M	201.943	227.182
Ap3b2	6.22695	-0.397073	0.0140787	0.153153	M	0	1.07443
Ap3d1	-0.284115	8.0081	0.66534	1	M	282.448	231.957
Ap3m1	0.718773	4.64235	0.289719	0.993522	M	18.7089	30.8002
Ap3m2	-0.410249	2.84637	0.581255	1	M	7.93713	5.96904
Ap3s1	-0.196849	5.82285	0.765624	1	M	60.2088	52.5275
Ap3s2	0.0425408	3.43561	0.981624	1	M	10.4317	10.7443
Ap4b1	0.517277	5.86089	0.435656	1	M	47.6228	68.1664
Ap4e1	1.32108	4.26768	0.0571164	0.41645	M	10.8852	27.2188
Ap4m1	0.866781	5.51364	0.1959	0.84564	M	32.2021	58.7353
Ap4s1	0.187595	2.93123	0.795797	1	M	6.91664	7.87913
Ap5b1	0.406844	3.37591	0.564457	1	M	8.73084	11.5799
Ap5m1	0.420814	2.2032	0.599598	1	M	3.74179	5.01399
Ap5s1	0.418008	0.755952	0.792443	1	M	1.24726	1.67133
Ap5z1	0.630485	2.44055	0.415664	1	M	4.08195	6.32718
Apaf1	0.925093	2.17006	0.229628	0.922079	M	2.94808	5.6109
Apba1	0.213031	6.25951	0.748276	1	M	70.7538	82.0146
Apba2	-4.60867	-1.29894	0.285714	0.985287	M	0.340163	0
Apba3	0.113415	4.69824	0.867992	1	M	24.7185	26.7413
Apbb1	-0.0520254	4.12905	0.954085	1	M	17.5751	16.9521
Apbb1ip	-1.91891	2.51075	0.0147487	0.158377	M	8.61745	2.26823
Apbb2	1.74268	0.294078	0.146765	0.746189	M	0.45355	1.55195
Apbb3	0.85309	2.41096	0.26429	0.984391	M	3.6284	6.56594
Apc	0.626853	3.96894	0.36305	1	M	12.1325	18.7428
Apc2	-0.315852	1.2517	0.767877	1	M	2.38114	1.91009
Apcdd1	-0.164975	0.702609	0.89207	1	M	1.47404	1.31319
Apcs	0	-2.10399	1	1	M	0	0
Apeh	1.21667	4.03815	0.0803335	0.529256	M	9.75133	22.6823
Apela	0	-2.10399	1	1	M	0	0
Apex1	1.1714	5.21324	0.0833764	0.543172	M	22.6775	51.095
Apex2	0.951973	1.25904	0.293949	1	M	1.47404	2.86514
Aph1a	1.31031	2.19145	0.0883561	0.563023	M	2.49453	6.2078
Aph1b	0.886491	2.09266	0.251644	0.967592	M	2.83469	5.25275
Aph1c	1.10039	3.21951	0.126356	0.685473	M	5.78276	12.4156
Api5	0.444828	4.85834	0.515149	1	M	24.3783	33.1878
Apip	0.676318	2.97927	0.360748	1	M	5.89615	9.43108
Aplf	-0.418447	1.72597	0.669495	1	M	3.51501	2.62638
Apln	0.430082	0.219431	0.854437	1	M	0.793713	1.07443
Aplnr	4.12291	-1.51737	0.52381	1	M	0	0.238761
Aplp1	2.40067	5.10467	0.000643796	0.0132946	M	10.8852	57.5415
Aplp2	0.193902	6.56111	0.769413	1	M	87.8753	100.519
Apmap	0.46036	2.85453	0.540855	1	M	5.89615	8.11789
Apoa1	-0.849546	-1.29737	1	1	M	0.226775	0.119381
Apoa2	0	-2.10399	1	1	M	0	0
Apoa4	0	-2.10399	1	1	M	0	0
Apoa5	0	-2.10399	1	1	M	0	0
Apob	-3.13737	-1.78287	1	1	M	0.113388	0
Apobec2	0.329802	-0.196233	1	1	M	0.566938	0.716284
Apobec4	-1.12902	5.7268	0.0920492	0.576028	M	72.3413	33.0685
Apoc1	1.5566	0.657328	0.14853	0.748273	M	0.680325	2.02947
Apoc2	0	-2.10399	1	1	M	0	0
Apoc3	0	-2.10399	1	1	M	0	0
Apoc4	0	-2.10399	1	1	M	0	0
Apod	2.88919	1.63921	0.00171465	0.0299159	M	0.680325	5.13337
Apof	-4.05297	-1.5206	0.52381	1	M	0.226775	0
Apoh	-0.152592	5.09876	0.823646	1	M	35.8305	32.2328
Apol10a	-6.30363	-0.303331	0.00922396	0.111312	M	1.13388	0
Apol10b	0	-2.10399	1	1	M	0	0
Apol11a	0.985538	-1.29578	1	1	M	0.113388	0.238761
Apol11b	5.65158	-0.777486	0.0565217	0.41645	M	0	0.716284
Apol6	-0.485757	-0.934726	1	1	M	0.340163	0.238761
Apol7a	0	-2.10399	1	1	M	0	0
Apol7c	-0.0872682	2.9064	0.94769	1	M	7.48358	7.04346
Apol7d	0.985538	-1.29578	1	1	M	0.113388	0.238761
Apol7e	3.20342	-1.78122	1	1	M	0	0.119381
Apol8	0.472235	-0.643699	1	1	M	0.340163	0.477523
Apol9a	0	-2.10399	1	1	M	0	0
Apol9b	4.12291	-1.51737	0.52381	1	M	0	0.238761
Apold1	-0.094229	0.287984	1	1	M	1.02049	0.955046
Apom	0.472235	-0.643699	1	1	M	0.340163	0.477523
Apon	0	-2.10399	1	1	M	0	0
Apoo	1.01169	2.17069	0.18837	0.835412	M	2.83469	5.73028
Apoo-ps	0	-2.10399	1	1	M	0	0
Apool	-0.164975	0.702609	0.89207	1	M	1.47404	1.31319
Apopt1	-1.14255	4.15998	0.0954373	0.580954	M	24.2649	10.983
App	0.783353	6.09288	0.239082	0.94145	M	50.0039	86.0735
Appbp2	0.554292	6.14481	0.403645	1	M	57.1473	83.9247
Appbp2os	1.54762	1.29693	0.0847783	0.546039	M	1.13388	3.34266
Appl1	0.467269	4.19587	0.498805	1	M	15.1939	21.011
Appl2	1.04616	3.83773	0.134104	0.710661	M	9.18439	18.9815
Aprt	0.663752	7.12163	0.314642	1	M	107.605	170.476
Aptx	-1.4384	6.3613	0.0326394	0.288976	M	119.737	44.1709
Aqp1	1.02793	-0.780462	0.726708	1	M	0.226775	0.477523
Aqp11	0.133348	8.49832	0.839102	1	M	344.698	378.079
Aqp12	5.39428	-0.930174	0.0942029	0.576028	M	0	0.596904
Aqp2	0.83176	0.854233	0.454082	1	M	1.13388	2.02947
Aqp3	-5.00884	-1.107	0.161491	0.775745	M	0.45355	0
Aqp4	0	-2.10399	1	1	M	0	0
Aqp5	5.0809	-1.10081	0.161491	0.775745	M	0	0.477523
Aqp6	0	-2.10399	1	1	M	0	0
Aqp8	-1.99792	0.212004	0.083497	0.543172	M	1.47404	0.358142
Aqp9	0.849298	6.41812	0.200427	0.856401	M	60.8891	109.711
Aqr	0.412407	5.54668	0.535763	1	M	39.9124	53.1244
Ar	1.63024	2.35155	0.0310613	0.277598	M	2.38114	7.40161
Araf	0.0591238	3.50396	0.964905	1	M	10.8852	11.3412
Arap1	2.32241	2.94812	0.00204396	0.0341702	M	2.49453	12.535
Arap2	-0.631437	2.26592	0.420445	1	M	5.55599	3.58142
Arap3	2.82938	1.79456	0.00162304	0.0285395	M	0.793713	5.73028
Arc	0.156829	8.80828	0.811016	1	M	423.729	472.39
Arcn1	0.441242	6.44259	0.503598	1	M	73.5885	99.9217
Areg	4.12291	-1.51737	0.52381	1	M	0	0.238761
Arel1	-1.14533	6.30141	0.0866522	0.556061	M	108.285	48.9461
Arf1	0.577854	7.45497	0.380368	1	M	140.601	209.871
Arf2	0.771027	4.43999	0.255201	0.972554	M	15.8743	27.0994
Arf3	0.542632	6.01901	0.412982	1	M	52.6118	76.6424
Arf4	-0.418774	6.70457	0.525703	1	M	119.057	89.058
Arf5	0.429034	4.11996	0.54091	1	M	14.627	19.6978
Arf6	0.934131	4.80455	0.169035	0.797505	M	19.0491	36.4111
Arfgap1	0.726574	5.53225	0.275527	0.985287	M	34.6966	57.4221
Arfgap2	0.21355	5.97813	0.74856	1	M	58.1678	67.4501
Arfgap3	0.272183	7.05552	0.679914	1	M	120.304	145.286
Arfgef1	-0.196495	6.93588	0.766372	1	M	130.509	113.889
Arfgef2	-0.109556	6.7172	0.868526	1	M	108.965	100.996
Arfgef3	0.155658	1.18231	1	1	M	1.92759	2.14885
Arfip1	0.891231	2.51836	0.228052	0.91796	M	3.85518	7.16284
Arfip2	0.391115	3.12869	0.588489	1	M	7.37019	9.66984
Arfrp1	-0.0459596	4.66366	0.95207	1	M	25.5122	24.7118
Arg1	-3.13737	-1.78287	1	1	M	0.113388	0
Arg2	-2.10383	0.281898	0.06403	0.448763	M	1.58743	0.358142
Arglu1	0.605867	5.21383	0.363842	1	M	29.254	44.529
Arhgap1	0.751727	4.14748	0.27281	0.985287	M	13.0396	21.9661
Arhgap10	1.23445	4.16185	0.0763732	0.511163	M	10.545	24.8312
Arhgap11a	0.23529	3.54954	0.749515	1	M	10.545	12.4156
Arhgap12	-0.91574	3.82891	0.186922	0.832137	M	18.2554	9.66984
Arhgap15	0.252899	1.06731	0.913871	1	M	1.70081	2.02947
Arhgap15os	-3.13737	-1.78287	1	1	M	0.113388	0
Arhgap17	2.32427	3.75622	0.00143956	0.0256503	M	4.42211	22.2048
Arhgap19	0.209436	6.58601	0.752817	1	M	88.8958	102.787
Arhgap20	0.300256	3.76962	0.671131	1	M	12.0191	14.8032
Arhgap20os	-3.13737	-1.78287	1	1	M	0.113388	0
Arhgap21	0.941112	3.41326	0.179939	0.825483	M	7.14342	13.7288
Arhgap22	2.89636	0.764574	0.00728936	0.0941118	M	0.340163	2.62638
Arhgap23	0.343736	4.82783	0.609053	1	M	24.8319	31.5165
Arhgap24	0.827104	1.18607	0.371253	1	M	1.47404	2.62638
Arhgap25	3.31535	0.606909	0.00583707	0.0789481	M	0.226775	2.38761
Arhgap26	-0.486374	2.64654	0.528055	1	M	7.03003	5.01399
Arhgap27	2.28593	0.659548	0.0365207	0.309326	M	0.45355	2.26823
Arhgap27os3	4.12291	-1.51737	0.52381	1	M	0	0.238761
Arhgap28	1.00519	1.18701	0.2718	0.985287	M	1.36065	2.74576
Arhgap29	-0.407062	8.32	0.535183	1	M	364.087	274.576
Arhgap30	-1.10962	3.80938	0.111973	0.642235	M	18.8223	8.71479
Arhgap31	2.37158	1.22951	0.0120652	0.136679	M	0.680325	3.58142
Arhgap32	0.0741455	2.77934	0.971498	1	M	6.46309	6.8047
Arhgap33	0.0923396	6.92162	0.889805	1	M	117.129	124.872
Arhgap33os	-0.0583632	3.37114	0.942509	1	M	10.3183	9.9086
Arhgap35	-0.278811	6.70149	0.675042	1	M	113.841	93.8333
Arhgap36	6.05943	-0.513159	0.0219002	0.213334	M	0	0.955046
Arhgap39	0.283253	5.5541	0.675391	1	M	42.1802	51.3337
Arhgap4	3.51584	0.765652	0.00222798	0.0366007	M	0.226775	2.74576
Arhgap40	1.88945	1.39838	0.0347653	0.29876	M	1.02049	3.82018
Arhgap42	-0.916542	0.84586	0.315121	1	M	2.04098	1.07443
Arhgap44	0.225939	3.18367	0.763571	1	M	8.1639	9.55046
Arhgap5	0.418913	6.46918	0.526754	1	M	75.6295	101.115
Arhgap6	5.39428	-0.930174	0.0942029	0.576028	M	0	0.596904
Arhgap8	-5.57879	-0.786402	0.0565217	0.41645	M	0.680325	0
Arhgap9	2.62105	0.906707	0.0103313	0.120473	M	0.45355	2.86514
Arhgdia	0.681704	5.89298	0.306158	1	M	45.4684	72.9416
Arhgdig	-0.14667	0.802193	0.898528	1	M	1.58743	1.43257
Arhgef1	1.15557	3.97968	0.0962765	0.584167	M	9.63794	21.4885
Arhgef10	0.0200107	5.33712	0.979892	1	M	39.9124	40.4701
Arhgef10l	0.964303	4.53254	0.154074	0.768205	M	15.5341	30.3227
Arhgef11	-0.152388	4.89983	0.824754	1	M	31.1816	28.0545
Arhgef12	0.222445	4.83821	0.742412	1	M	26.1925	30.5615
Arhgef15	1.16699	2.47558	0.115978	0.656594	M	3.28824	7.40161
Arhgef16	4.12291	-1.51737	0.52381	1	M	0	0.238761
Arhgef17	0.716656	2.8914	0.331988	1	M	5.4426	8.95356
Arhgef18	0.115709	2.08675	0.910267	1	M	3.85518	4.17833
Arhgef19	1.54263	-1.10236	0.658385	1	M	0.113388	0.358142
Arhgef25	0.203909	2.74338	0.79915	1	M	6.00954	6.92408
Arhgef26	0.905166	0.0687283	0.542974	1	M	0.566938	1.07443
Arhgef28	1.14913	0.759185	0.285115	0.985287	M	0.9071	2.02947
Arhgef3	-0.431855	3.04158	0.568243	1	M	9.18439	6.8047
Arhgef33	0.234591	4.25622	0.740498	1	M	17.3483	20.4141
Arhgef37	-1.11686	-0.29921	0.442579	1	M	0.793713	0.358142
Arhgef38	0	-2.10399	1	1	M	0	0
Arhgef39	0.445314	2.81903	0.554538	1	M	5.78276	7.87913
Arhgef4	-0.885935	-0.783434	0.726708	1	M	0.45355	0.238761
Arhgef40	1.43135	2.21068	0.0629007	0.44529	M	2.38114	6.44656
Arhgef5	-0.0624513	0.539603	1	1	M	1.24726	1.19381
Arhgef6	-1.79771	3.79768	0.011318	0.130424	M	21.2035	6.08842
Arhgef7	0.102522	5.3871	0.883717	1	M	40.1392	43.0965
Arhgef9	0.385434	-0.402688	1	1	M	0.45355	0.596904
Arid1a	-0.274179	6.0309	0.680851	1	M	71.3208	58.9741
Arid1b	0.133784	3.1165	0.86393	1	M	8.05052	8.83418
Arid2	-0.111371	7.54968	0.866152	1	M	194.346	179.907
Arid3a	-0.233568	5.43814	0.728529	1	M	46.6023	39.6344
Arid3b	0.416641	6.7005	0.528035	1	M	88.8958	118.664
Arid3c	5.39428	-0.930174	0.0942029	0.576028	M	0	0.596904
Arid4a	0.716719	4.30064	0.298883	1	M	14.7404	24.2343
Arid4b	1.0384	5.16542	0.124964	0.68052	M	23.3578	47.9911
Arid5a	1.73066	2.96636	0.0193561	0.196992	M	3.51501	11.6993
Arid5b	-0.871329	2.87671	0.23163	0.926682	M	9.18439	5.01399
Arih1	-0.716505	7.54488	0.277301	0.985287	M	231.878	141.108
Arih2	0.232762	8.08818	0.723046	1	M	250.02	293.796
Arl1	0.482584	5.70441	0.46864	1	M	43.314	60.526
Arl10	0.472235	-0.643699	1	1	M	0.340163	0.477523
Arl11	-1.52542	3.75139	0.0318862	0.283079	M	19.616	6.8047
Arl13a	0.455107	4.54511	0.506515	1	M	19.5027	26.7413
Arl13b	-0.42949	6.10018	0.519243	1	M	78.4642	58.2578
Arl14	0	-2.10399	1	1	M	0	0
Arl14ep	0.855074	5.65945	0.201147	0.858347	M	35.8305	64.8237
Arl14epl	0.36048	3.58631	0.61723	1	M	10.3183	13.2513
Arl15	0.716083	0.358116	0.612094	1	M	0.793713	1.31319
Arl16	1.33765	2.49199	0.0724939	0.49511	M	3.06146	7.75975
Arl2	0.592871	4.84838	0.382893	1	M	22.7909	34.3817
Arl2bp	-0.0604323	7.78588	0.927423	1	M	225.074	215.84
Arl3	0.687952	7.50545	0.296773	1	M	139.013	223.958
Arl4a	0.262302	8.75501	0.689087	1	M	392.661	470.957
Arl4c	0.642599	3.74835	0.365604	1	M	10.3183	16.1164
Arl4d	2.44786	1.66484	0.00591026	0.0795593	M	0.9071	5.01399
Arl5a	0.877455	1.78481	0.263542	0.984391	M	2.26775	4.17833
Arl5b	0.385242	4.42005	0.577225	1	M	18.3688	23.9955
Arl5c	4.49253	0.766731	0.000488131	0.0105395	M	0.113388	2.86514
Arl6	0.622475	5.12013	0.355369	1	M	27.213	41.9026
Arl6ip1	0.198322	5.65499	0.768931	1	M	46.7157	53.602
Arl6ip4	-0.239619	4.28561	0.735828	1	M	20.8633	17.6684
Arl6ip5	2.14426	2.08043	0.00997463	0.117748	M	1.47404	6.56594
Arl6ip6	0.573237	6.37781	0.386257	1	M	66.6719	99.2054
Arl8a	2.55984	1.91155	0.00318886	0.0484962	M	1.02049	6.08842
Arl8b	0.475177	6.93125	0.471152	1	M	101.935	141.705
Armc1	0.78645	2.99094	0.285442	0.985287	M	5.66938	9.78922
Armc10	0.0417693	2.43553	1	1	M	5.10244	5.25275
Armc12	-0.406005	7.30665	0.537546	1	M	180.173	135.975
Armc2	0.288224	6.33214	0.665109	1	M	72.3413	88.3418
Armc3	0.206581	7.92551	0.753318	1	M	225.528	260.25
Armc4	0.0986025	6.4925	0.88472	1	M	86.7415	92.8782
Armc5	0.39078	3.92266	0.571997	1	M	12.9262	16.9521
Armc6	-0.408235	1.21558	0.686852	1	M	2.38114	1.79071
Armc7	1.06231	0.708074	0.335879	1	M	0.9071	1.91009
Armc8	0.126423	4.5085	0.858624	1	M	21.5436	23.518
Armc9	0.352149	6.48443	0.593571	1	M	78.4642	100.16
Armcx1	3.23965	-0.190823	0.0399705	0.327839	M	0.113388	1.19381
Armcx2	1.07059	2.26208	0.16191	0.777439	M	2.94808	6.2078
Armcx3	2.00139	1.86312	0.0180807	0.186094	M	1.36065	5.49151
Armcx4	1.05524	0.14733	0.438083	1	M	0.566938	1.19381
Armcx5	1.90117	1.99641	0.0221354	0.215257	M	1.58743	5.96904
Armcx6	2.42945	0.763496	0.0236304	0.225559	M	0.45355	2.507
Armt1	-0.256251	5.44173	0.706844	1	M	47.0558	39.3956
Arnt	0.656134	4.68822	0.335216	1	M	19.8428	31.2778
Arnt2	-0.270884	0.752721	0.792443	1	M	1.58743	1.31319
Arntl	0.564291	2.24046	0.471443	1	M	3.6284	5.37213
Arntl2	0.0727919	-0.103786	1	1	M	0.680325	0.716284
Arpc1a	0.0615605	6.72333	0.926639	1	M	103.183	107.681
Arpc1b	1.40263	3.91604	0.0443029	0.354478	M	8.1639	21.6079
Arpc2	0.66104	7.26291	0.316337	1	M	118.83	187.905
Arpc3	1.33257	4.31969	0.0525577	0.40207	M	11.2254	28.2932
Arpc4	0.985052	3.14389	0.177858	0.82074	M	5.78276	11.4606
Arpc5	1.50527	3.73118	0.0321838	0.285386	M	6.80325	19.3397
Arpc5l	0.445665	6.80094	0.49994	1	M	94.225	128.334
Arpin	2.00646	-0.292328	0.191276	0.835653	M	0.226775	0.955046
Arpp19	-0.6241	3.71597	0.365453	1	M	15.6475	10.1474
Arpp21	0.223366	0.420449	1	1	M	1.02049	1.19381
Arr3	0	-2.10399	1	1	M	0	0
Arrb1	-2.19967	4.43711	0.00199711	0.0335101	M	35.1501	7.64037
Arrb2	2.21535	3.43122	0.00254827	0.0406009	M	3.74179	17.4296
Arrdc1	0.582642	2.29314	0.455728	1	M	3.74179	5.6109
Arrdc2	0.20207	2.45235	0.824282	1	M	4.87566	5.6109
Arrdc3	0.726504	6.20295	0.274783	0.985287	M	55.3331	91.565
Arrdc4	1.47784	2.53749	0.0476925	0.374684	M	2.94808	8.23727
Arsa	0.169565	8.58183	0.796087	1	M	360.459	405.417
Arsb	0.619307	3.67074	0.382648	1	M	9.86472	15.1614
Arsg	1.71016	2.03734	0.0375767	0.316423	M	1.8142	5.96904
Arsi	2.25691	-0.778974	0.282609	0.985287	M	0.113388	0.596904
Arsj	3.20342	-1.78122	1	1	M	0	0.119381
Arsk	-0.833048	2.81917	0.256424	0.974182	M	8.73084	4.89461
Art1	-0.566749	2.65913	0.456779	1	M	7.2568	4.89461
Art2a-ps	-4.05297	-1.5206	0.52381	1	M	0.226775	0
Art2b	0	-2.10399	1	1	M	0	0
Art3	0.478443	8.0591	0.466531	1	M	222.693	310.271
Art4	2.00646	-0.292328	0.191276	0.835653	M	0.226775	0.955046
Art5	-0.123608	6.25861	0.854145	1	M	79.5981	73.061
Artn	-0.139493	2.70209	0.850972	1	M	6.57648	5.96904
Arv1	0.463452	1.25629	0.63737	1	M	1.8142	2.507
Arvcf	-0.392581	2.75039	0.606931	1	M	7.37019	5.6109
Arx	3.45206	0.714638	0.00281198	0.0440919	M	0.226775	2.62638
Arxes1	3.20342	-1.78122	1	1	M	0	0.119381
Arxes2	0.861027	-0.194882	0.63315	1	M	0.45355	0.835665
As3mt	0.304268	3.74478	0.665858	1	M	11.7923	14.5645
Asah1	2.57759	3.0248	0.000702647	0.0143664	M	2.26775	13.6094
Asah2	2.12655	0.54761	0.0572733	0.41645	M	0.45355	2.02947
Asap1	-0.0468491	7.97123	0.943783	1	M	254.782	246.641
Asap2	0.370648	0.94231	0.814851	1	M	1.47404	1.91009
Asap3	-1.36501	2.48489	0.0773867	0.51582	M	7.71035	2.98452
Asb1	-0.115566	6.03669	0.863998	1	M	68.0325	62.7943
Asb10	-0.591985	-0.018265	0.670342	1	M	0.9071	0.596904
Asb11	0.785613	-0.517452	0.769726	1	M	0.340163	0.596904
Asb12	-2.7565	2.43234	0.000671796	0.0138226	M	8.95762	1.31319
Asb13	2.00646	-0.292328	0.191276	0.835653	M	0.226775	0.955046
Asb14	-1.11788	1.0996	0.224728	0.911745	M	2.60791	1.19381
Asb16	3.20342	-1.78122	1	1	M	0	0.119381
Asb17os	-0.485757	-0.934726	1	1	M	0.340163	0.238761
Asb18	0	-2.10399	1	1	M	0	0
Asb2	0.67702	1.85512	0.388873	1	M	2.60791	4.17833
Asb3	0.314657	2.85317	0.684316	1	M	6.23631	7.75975
Asb4	0.935354	6.0822	0.161523	0.775745	M	46.3755	88.6999
Asb5	-2.85193	0.347335	0.0167826	0.175272	M	1.8142	0.238761
Asb6	-0.128771	2.1238	0.912508	1	M	4.30873	3.93956
Asb7	-0.626962	3.20272	0.386264	1	M	10.8852	7.04346
Asb8	-2.1786	4.72009	0.00197638	0.0335101	M	42.7471	9.43108
Ascc1	-2.03732	5.77697	0.00314206	0.0479771	M	87.762	21.3692
Ascc2	-0.226293	6.91206	0.732054	1	M	129.602	110.785
Ascc3	-0.174632	5.77804	0.794198	1	M	57.941	51.3337
Ascl1	0	-2.10399	1	1	M	0	0
Ascl2	0.069938	-1.10391	1	1	M	0.226775	0.238761
Ascl3	3.81882	0.226871	0.00744743	0.0951797	M	0.113388	1.79071
Ascl4	0.0660534	-1.51899	1	1	M	0.113388	0.119381
Ascl5	0	-2.10399	1	1	M	0	0
Asdurf	0	-2.10399	1	1	M	0	0
Asf1a	0.447266	4.33571	0.512822	1	M	16.8947	23.0405
Asf1b	0.299538	5.14515	0.659986	1	M	31.5217	38.7987
Asgr1	0.0660534	-1.51899	1	1	M	0.113388	0.119381
Asgr2	1.54263	-1.10236	0.658385	1	M	0.113388	0.358142
Ash1l	0.432625	5.55411	0.516193	1	M	39.799	53.7213
Ash2l	0.30001	7.42631	0.648554	1	M	153.98	189.577
Asic1	4.12291	-1.51737	0.52381	1	M	0	0.238761
Asic2	0	-2.10399	1	1	M	0	0
Asic3	0.0713364	-0.781948	1	1	M	0.340163	0.358142
Asic4	0	-2.10399	1	1	M	0	0
Asic5	0	-2.10399	1	1	M	0	0
Asl	-0.184759	3.11335	0.819207	1	M	8.95762	7.87913
Asmt	0	-2.10399	1	1	M	0	0
Asna1	0.376924	6.43889	0.569471	1	M	75.2893	97.7728
Asns	-1.19268	5.61189	0.0769077	0.513818	M	67.6924	29.6064
Asnsd1	-0.0831278	7.53701	0.900169	1	M	190.831	180.146
Aspa	3.42528	1.55603	0.000458791	0.0100299	M	0.45355	5.01399
Aspdh	3.20342	-1.78122	1	1	M	0	0.119381
Aspg	1.76836	-0.0117441	0.189984	0.835653	M	0.340163	1.19381
Asph	1.13134	2.13349	0.141868	0.735869	M	2.60791	5.73028
Asphd1	2.32405	-0.0984739	0.0999758	0.596934	M	0.226775	1.19381
Asphd2	1.54263	-1.10236	0.658385	1	M	0.113388	0.358142
Aspm	0.63528	4.18385	0.355333	1	M	14.0601	21.8467
Aspn	2.7325	-0.514591	0.12496	0.68052	M	0.113388	0.835665
Asprv1	-2.37537	-0.648068	0.186957	0.832137	M	0.680325	0.119381
Aspscr1	-0.122991	7.72852	0.852052	1	M	220.879	202.828
Asrgl1	0.155424	10.178	0.812263	1	M	1095.89	1220.55
Ass1	0	-2.10399	1	1	M	0	0
Aste1	0.238999	6.46124	0.718342	1	M	80.6185	95.1465
Astl	0	-2.10399	1	1	M	0	0
Astn1	-3.10021	-0.202983	0.0399705	0.327839	M	1.13388	0.119381
Astn2	-1.40524	-1.10546	0.658385	1	M	0.340163	0.119381
Asxl1	0.10958	7.83772	0.868024	1	M	219.858	237.21
Asxl2	0.489106	4.92968	0.465331	1	M	25.172	35.3367
Asxl3	-2.1617	0.931115	0.0287437	0.262879	M	2.7213	0.596904
Asz1	0.9439	4.05596	0.16755	0.792688	M	11.2254	21.6079
Atad2	-1.01106	5.47108	0.131093	0.69937	M	58.9615	29.2483
Atad2b	-0.188511	3.70134	0.802539	1	M	13.6065	11.9381
Atad3a	0.917668	3.87155	0.189009	0.835653	M	9.9781	18.8622
Atad3aos	0.960982	1.3612	0.282111	0.985287	M	1.58743	3.1039
Atad5	1.10034	4.25671	0.107719	0.627652	M	12.0191	25.7862
Atat1	-1.96575	5.15873	0.0045161	0.063867	M	56.467	14.4451
Atcay	-0.184514	-0.197585	1	1	M	0.680325	0.596904
Ate1	0.421309	5.68415	0.526386	1	M	43.7676	58.6159
Atf1	0.734065	7.04977	0.267031	0.984862	M	99.3275	165.223
Atf2	0.0946781	6.50545	0.887898	1	M	87.6486	93.5945
Atf4	1.48283	5.08738	0.0297316	0.268352	M	17.8018	49.7818
Atf5	-0.866422	3.14507	0.219493	0.89998	M	11.112	6.08842
Atf6	0.8827	4.25449	0.199306	0.854339	M	13.2663	24.4731
Atf6b	0.145064	4.07255	0.833795	1	M	15.7609	17.4296
Atf7	1.01376	4.26467	0.137993	0.721934	M	12.586	25.4281
Atf7ip	0.614944	5.80133	0.354697	1	M	43.881	67.2114
Atf7ip2	0.410841	5.45749	0.540822	1	M	37.5313	49.9012
Atg10	1.99002	0.949439	0.0400936	0.328344	M	0.680325	2.74576
Atg101	1.28742	2.77769	0.0807707	0.531366	M	3.85518	9.43108
Atg12	0.660624	5.48702	0.322115	1	M	34.5832	54.6764
Atg13	0.300759	6.25069	0.65181	1	M	68.0325	83.8053
Atg14	0.281513	3.43031	0.694805	1	M	9.52455	11.5799
Atg16l1	0.14013	2.97418	0.850498	1	M	7.2568	7.99851
Atg16l2	0.516714	0.805379	0.701513	1	M	1.24726	1.79071
Atg2a	-0.286174	6.19967	0.665291	1	M	80.5052	66.0176
Atg2b	-0.0439817	6.06414	0.948209	1	M	67.6924	65.6594
Atg3	0.257583	4.47641	0.706586	1	M	20.0696	23.9955
Atg4a	0.653665	0.986873	0.567307	1	M	1.36065	2.14885
Atg4b	0.428998	5.38298	0.523015	1	M	35.3769	47.6329
Atg4c	0.0613346	4.71051	0.930514	1	M	25.3988	26.5025
Atg4d	-0.492923	4.03015	0.475879	1	M	18.8223	13.3706
Atg5	1.5013	2.1927	0.0516732	0.397443	M	2.26775	6.44656
Atg7	-0.122579	5.98461	0.855775	1	M	65.7648	60.4067
Atg9a	-0.355286	8.60338	0.588046	1	M	436.315	341.071
Atg9b	0.977411	2.09332	0.205609	0.869068	M	2.7213	5.37213
Atic	0.619315	1.98817	0.429983	1	M	2.94808	4.53647
Atl1	-0.0276985	4.81752	0.971292	1	M	28.2335	27.6963
Atl2	0.562629	5.56281	0.398309	1	M	37.9848	56.109
Atm	-0.119476	4.203	0.86956	1	M	18.9357	17.4296
Atmin	0.00577541	6.05216	0.996925	1	M	65.9915	66.2563
Atn1	0.539579	4.36974	0.429769	1	M	16.668	24.2343
Atoh1	0	-2.10399	1	1	M	0	0
Atoh7	0	-2.10399	1	1	M	0	0
Atoh8	0.586891	7.78566	0.372514	1	M	176.204	264.667
Atox1	0.422669	4.10529	0.546687	1	M	14.5136	19.4591
Atp10a	-0.748715	6.84101	0.258095	0.978498	M	143.435	85.3572
Atp10b	-1.90439	0.974824	0.0480368	0.376999	M	2.7213	0.716284
Atp10d	1.78454	3.46728	0.0134116	0.148599	M	4.87566	16.8327
Atp11a	-0.29557	5.92442	0.657914	1	M	66.6719	54.3182
Atp11b	-0.355709	4.86911	0.601287	1	M	32.5422	25.4281
Atp11c	0.635075	4.38701	0.352253	1	M	16.2144	25.1893
Atp12a	-0.64178	-0.52031	0.769726	1	M	0.566938	0.358142
Atp13a1	0.164624	4.60873	0.811343	1	M	22.7909	25.5475
Atp13a2	0.543156	3.68968	0.446155	1	M	10.3183	15.042
Atp13a3	0.921029	5.00207	0.172448	0.806577	M	21.9972	41.6639
Atp13a4	2.30085	2.3045	0.00461399	0.0648755	M	1.58743	7.87913
Atp13a5	0.627031	-0.93321	1	1	M	0.226775	0.358142
Atp1a1	1.25669	3.98064	0.070898	0.487439	M	9.18439	21.9661
Atp1a2	1.74913	3.3384	0.0161562	0.170612	M	4.5355	15.2807
Atp1a3	-0.502074	0.142291	0.700311	1	M	1.02049	0.716284
Atp1b1	1.494	1.60583	0.08217	0.537926	M	1.47404	4.17833
Atp1b2	0.399868	3.17611	0.581063	1	M	7.59697	10.028
Atp1b3	-1.80532	7.35715	0.00763028	0.0968632	M	254.555	72.8223
Atp1b4	0	-2.10399	1	1	M	0	0
Atp23	0.105726	2.46678	0.929971	1	M	5.10244	5.49151
Atp2a1	0.593974	1.32586	0.526087	1	M	1.8142	2.74576
Atp2a2	-0.193997	6.78688	0.768048	1	M	117.583	102.787
Atp2a3	2.06605	2.38703	0.00954156	0.113818	M	1.92759	8.11789
Atp2b1	0.761521	3.80499	0.275622	0.985287	M	10.2049	17.3102
Atp2b2	-0.916542	0.84586	0.315121	1	M	2.04098	1.07443
Atp2b3	-4.60867	-1.29894	0.285714	0.985287	M	0.340163	0
Atp2b4	0.469894	6.47455	0.477713	1	M	74.3822	103.026
Atp2c1	-0.198225	4.27314	0.78348	1	M	20.4098	17.7877
Atp2c2	-0.117682	1.50995	1	1	M	2.7213	2.507
Atp4a	0.291079	-0.015658	1	1	M	0.680325	0.835665
Atp4b	0	-2.10399	1	1	M	0	0
Atp5a1	0.278257	7.53344	0.672383	1	M	167.247	202.828
Atp5b	0.213231	8.95283	0.744923	1	M	458.766	531.841
Atp5c1	0.223085	6.29003	0.738425	1	M	72.0011	84.044
Atp5d	0.755541	6.52551	0.255051	0.972146	M	68.3727	115.441
Atp5e	0.169251	5.53107	0.799598	1	M	43.314	48.7073
Atp5f1	0.432281	6.41511	0.514916	1	M	72.4546	97.7728
Atp5g1	-0.246286	4.96187	0.718948	1	M	33.5627	28.2932
Atp5g2	0.62738	4.17912	0.361289	1	M	14.0601	21.7273
Atp5g3	0.447979	4.08586	0.521509	1	M	14.1734	19.3397
Atp5h	0.536721	6.14579	0.418811	1	M	57.6009	83.5665
Atp5j	0.485724	6.95805	0.46148	1	M	103.409	144.809
Atp5j2	0.443881	5.1681	0.507943	1	M	30.2745	41.1864
Atp5k	-0.050551	4.52842	0.947554	1	M	23.2444	22.4436
Atp5l	0.49891	5.34287	0.455222	1	M	33.4493	47.2748
Atp5o	0.179935	6.48134	0.785341	1	M	83.5666	94.6689
Atp5s	0.69043	5.17331	0.303806	1	M	27.4398	44.2903
Atp6ap1	1.42707	3.69819	0.0419129	0.340211	M	6.91664	18.6234
Atp6ap1l	0.482626	6.06812	0.46599	1	M	55.7867	77.9556
Atp6ap2	1.76187	3.96879	0.012298	0.138832	M	7.03003	23.8761
Atp6v0a1	0.742074	3.86977	0.289066	0.99263	M	10.7718	18.0265
Atp6v0a2	0.577448	4.59963	0.399129	1	M	19.2759	28.7708
Atp6v0a4	-1.40524	-1.10546	0.658385	1	M	0.340163	0.119381
Atp6v0b	-0.00530454	4.09562	1	1	M	16.8947	16.8327
Atp6v0c	0	-2.10399	1	1	M	0	0
Atp6v0c-ps2	0	-2.10399	1	1	M	0	0
Atp6v0d1	0.588576	4.86	0.382787	1	M	23.0177	34.6204
Atp6v0d2	-3.13737	-1.78287	1	1	M	0.113388	0
Atp6v0e	1.07294	3.66859	0.123774	0.68052	M	8.05052	16.9521
Atp6v0e2	-0.494751	3.23981	0.4935	1	M	10.7718	7.64037
Atp6v1a	0.470595	6.48588	0.476047	1	M	74.9492	103.861
Atp6v1b1	1.03452	4.51488	0.13042	0.69937	M	14.8538	30.4421
Atp6v1b2	0.84237	5.23235	0.210932	0.881247	M	26.7595	47.9911
Atp6v1c1	0.386992	6.1392	0.559747	1	M	60.8891	79.627
Atp6v1c2	0.83176	0.854233	0.454082	1	M	1.13388	2.02947
Atp6v1d	0.992484	6.7953	0.134917	0.713866	M	74.1555	147.555
Atp6v1e1	0.7	3.9589	0.309105	1	M	11.6789	18.9815
Atp6v1e2	0.352298	6.92696	0.593396	1	M	106.698	136.213
Atp6v1f	-0.528506	5.65946	0.427275	1	M	59.4151	41.1864
[truncated: 20,737 more rows]

## Sheet: Fig 2A
Species	ID	Amino acid sequences
Human	NP_699161.1	MANYYEVLGVQASASPEDIKKAYRKLALRWHPDKNPDNKEEAEKKFKLVSEAYEVLSDSKKRSLYDRAGC DSWRAGGGASTPYHSPFDTGYTFRNPEDIFREFFGGLDPFSFEFWDSPFNSDRGGRGHGLRGAFSAGFGE FPAFMEAFSSFNMLGCSGGSHTTFSSTSFGGSSSGSSGFKSVMSSTEMINGHKVTTKRIVENGQERVEVE EDGQLKSVTVNGKEQLKWMDSK
Chimp	XP_526299.1	MANYYEVLGVQASASPEDIKKAYRKLALRWHPDKNPDNKEEAEKKFKLVSEAYEVLSDSKKRSLYDRAGC DSWRAGGGASTPYHSPFDTGYTFRNPEDIFREFFGGLDPFSFEFWDSPFNSDCGGQGHGLRGAFSAGFGE FPAFMEAFSSFNMLGCSGGSHTTCSSTSFGGSSSGSSGFKSVMSSTEMINGHKVTTKRIVENGQERVEVE EDGQLKSVTVNGKEQLKWMDSK
Gorilla	XP_003279940.1	MANYYEVLGVQASASLEDIKKAYRKLALRWHPDKNPDNKEEAEKKFKQVSEAYEVLSDSKKRSLYDRAGS DSWRAGGGASTPYRSPFDTGYIFRNPEDIFREFFGGLDPFSFEFWDSPFNSDHGGRGHGLRGAFSEGLGE FPAFMEAFSSFNVLGRSGGSHTTFSSTSFGGSSSGSSGFKSVMSSTEMINGHKVTTKRIVENGQERVEVE EDGQLKSVTVNGKEQLRWMDSK
Gibbon	NP_001271507.1	MANYYEVLGVQASASPEDIKKAYRKLALRWHPDKNPDNKEEAEKKFKQVSEAYEVLSDSKKRSLYDRAGC DSWRAGGGASTPYGSPFDTGYTFRNPEDIFREFFGGLDPFSFEFWDSPFNSDRGGRGHGLRGAFSAGFGE FPAFMEAFSSFNTLGRSGGSHTTFSSTSFGGSGSGSSGFKSVMSSTEMINGHKVTTKRIVENGQERVEVE EDGQLKSVTVNGKEQLKWMDSK
Squirrel	XP_012598866.1	MATYYQVLGVPPAASAEDIKKAYRKLALRWHPDKNPSLKEEAEKRFKQVSEAYEVLSDSKRRAAYDRTGC DTWRAGGGGSGGGGRGGGRGGGPNVPYGGGGSPFEAGYSFRNPEDIFREFFGGLDPFSFDFWDSPLGGGG GRASGGGGGRASGNGGRGLRGAFSAGFGEFPAFMEAFSSFDAPGRGGGSRTAFSSASFGGSAGGSSGFRS VMSSTEVVNGHKVTTKRVVENGQERVEVEEDGQLKSVTINGKEQLKRVDNK
Mouse	XP_008761299.1	MANYYEVLGVQSSASPEDIKKAYRKLALRWHPDKNPDNKEEAEKKFKQVSEAYEVLSDSKKRSVYDRAGC DGWRAGGGASVPHAGPFGAGYPFRNPEDIFREFFGGLDPFSFEFWDTPFSDRGRPHGLRGAFSSGFGEFP AFMEAFSSFDTLGHGGGSHSTFSSTSFGGSGSGSSGFKSVMSSTEMVNGRKVTTKRIVENGHERVEVEED GKLRKPGIPRSSGPAKCRKCDRRSC
Cow	NP_064348.1	MANYYEVLGVQSSASPEDIKKAYRKLALRWHPDKNPDNKEEAEKKFKQVSEAYEVLSDSKKRSVYDRAGC DRWRAGGGANVPHSSPFGAGYPFRNPEDIFREFFGGLDPFSFEFWDTPFSGRGRPHGLHRVFPSGFGEFP AFMEALSSFNTLGHGGGSRSTFSSASFGGSGSSGFKSVMSSTEMVNGRKVTTKRIIENGQERVEVEEDGQ LRSVTVNGKEKLMRVDK
Macaque	XP_026266702.1	MANYYEVLGVQSSASPEDIKKAYRKLALRWHPDKNPDNKEEAEKKFKQVSEAYEVLSDSKKRSLYDRAGC DSWRAGGGASTPYNSPFDTGYTFRNPEDIFREFFGGLDPFSFDFWDVPFSSDRGSRGHGLRGAFSAGFGE FPAFMEAFSNFDVLGRSGGSRTTFSSTSFGGSGSGSSGFKSVMSSTEMVNGHKVTTKRIVENGQERVEVE EDGQLKSVTINGKEQLKRVDSK
Rabbit	XP_002713131.1	MANYYEVLGVQASASPEDIKKAYRKLALRWHPDKNPDNKEEAEKKFKQVSEAYEVLSDSKKRSVYDRAGC DSWRAGGGGASTPYSSPFDTGYTFRNPEDIFREFFGGLDPFSFDFWDNPFGSERGGRGHGLRGAFSAGFG EFPAFMEAFSSFDALGRSGGSRTTFSSTSFGGSGSGSSGFKSVMSSTEMINGHKVTTKRIVENGQERVEV EEDGQLRSVTVNGKEQLKRVDGK
Horse	XP_851811.1_1	MANYYEVLGVQSSASPEDIKKAYRKLALRWHPDKNPDNKEEAEKQFKQVSEAYEVLSDTKRRSVYDRAGC DSWRAGGGASAPYGSPFDAGYTFRNPEDIFREFFGGLDPFSFDFWDAPFNSDRAGRGPGLRGAFSAGFGE FPAFMEAFSAFDALGRAGGASRTTFSSTSFGGSGAGSSGFKSVMSSTEMVNGHKVTTKRIVENGQERMEV EEDGQLKSVTINGKEQLKRVDNK
Elephant	XP_023475636.1	MANYYEVLGVAASASPEDIKKAYRKLALRWHPDKNPDDKEEAEKKFKQVSEAYEVLSDAKKRSLYDRAGA GGGRAGGPARGPFGAGYPFRNPEDIFREFFGGLDPFSFDLWDGPPGERTGRGAGLRGVLAAGFGEFPAFL EAFSAFDGPGRGASGRAASSAASCGGPGAGSSRFKSVVSSTEMVNGRKVTTKRIVENGQERVEVEEDGQL TSVTIDGKEQLQRVGGK
Pig	XP_020925098.1	MANYYEVLGVQASASPEDIKKAYRKLALRWHPDKNPDNKEEAEKKFKQVSEAYEVLSDSKKRSVYDRAGC DSWRAGGASTPYSSPFDSGYIFRNPEDIFREFFGGLDPFSFDFWDTPFVSDRGGRGHGLRGAFSAGFGEF PAFMEAFSAFDTLGRGVGGAGRTTFSSTSFSGSGSSGFKSVMSSTEMVNGHKVTTKRIVENGQERVEVEE DGQLKSVTINGKEQLKRVDSK
Lemur	XP_002697194.1	MANYYEVLGVQASASPEDIKKAYRKLALRWHPDKNPDNKEEAEKKFKQVSEAYEVLSDSKKRSLYDRAGC DGWRLGGTGSPHGSPFGGGYTFRNPEDIFREFFGGLDPFSFDFWDAPFGSERGARGHGLRGAFSAGFGEF PAFMEAFSAFDSLGRGGAGRTTFSSTSFGGSGSGGSGFKSVMSSTEIVNGHKVTTKRIVENGQERVEVEE DGQLTSVTINGKEQLKRVDSK
Rat	XP_010588225.1	MANFYEVLGVKSSASPEDIKKAYRKLALRWHPDKNPDHQRGGREEFKQCLRPMSLSDSKKGSLYDRAGCD SWRAGGGASTPYNSPFDTGYTFRNPEDIFREFFGGLDPFSFDFWDNPFNSDRDSRGRGLRGAFSAGFGEF PAFMEAFSSFDNTLGRGGGGSRTTFSSTSFGGSGSGSSGFKSVMSSTEMINGRKITTKRIVENGQERVEV EEDGQLKSVTINGKEQLKRVDNK
Dog	XP_012887771.1	MANYYEVLGVQANASAEDIKKAYRKLALRWHPDKNPNNKEEAEKKFKQVSEAYEVLSDSKKRLVYDRAGC EAWRAGGAGPACGGPFSSGYTFRNPEDIFREFFGGLDPFSFDFWDGPFGSERGRSHGLRGAFTAGFGEFP AFVEAFSAFDSLGRAGGGSRSTFSSTSFGGSGAGSSGFKSVMSSTEMVNGHKITTKRVVENGQERVEVEE DGQLTSVTVNGKEQLKRVDSK

## Sheet: Fig 2B
Sample	Tissue_abbr	Tissue	Gender	Number	Expression data
mAg_Female(F)_815	Ag	Adrenal gland	F	815	0
mAg_F_831	Ag	Adrenal gland	F	831	0
mAg_Male(M)_783	Ag	Adrenal gland	M	783	0
mAg_M_799	Ag	Adrenal gland	M	799	0
mBr_F_812	Br	Brain	F	812	0
mBr_F_828	Br	Brain	F	828	0
mBr_F_848	Br	Brain	F	848	0
mBr_F_850	Br	Brain	F	850	0
mBr_M_780	Br	Brain	M	780	0
mBr_M_796	Br	Brain	M	796	0
mBr_M_844	Br	Brain	M	844	0
mBr_M_846	Br	Brain	M	846	0
mFs_F_823	Fs	Forestomach	F	823	0
mFs_F_839	Fs	Forestomach	F	839	0
mFs_M_791	Fs	Forestomach	M	791	0.16
mFs_M_807	Fs	Forestomach	M	807	0
mHe_F_818	He	Heart	F	818	0
mHe_F_834	He	Heart	F	834	0
mHe_M_786	He	Heart	M	786	0
mHe_M_802	He	Heart	M	802	0
mKi_F_814	Ki	Kidney	F	814	0
mKi_F_830	Ki	Kidney	F	830	0
mKi_M_782	Ki	Kidney	M	782	0
mKi_M_798	Ki	Kidney	M	798	0.15
mLi_F_813	Li	Liver	F	813	0
mLi_F_829	Li	Liver	F	829	0
mLi_F_849	Li	Liver	F	849	0
mLi_F_851	Li	Liver	F	851	0
mLi_M_781	Li	Liver	M	781	0.13
mLi_M_797	Li	Liver	M	797	0
mLi_M_845	Li	Liver	M	845	0
mLi_M_847	Li	Liver	M	847	0
mLin_F_825	Lin	Large intestine	F	825	0
mLin_F_841	Lin	Large intestine	F	841	0
mLin_M_793	Lin	Large intestine	M	793	0
mLin_M_809	Lin	Large intestine	M	809	0
mLu_F_817	Lu	Lung	F	817	0
mLu_F_833	Lu	Lung	F	833	0
mLu_M_785	Lu	Lung	M	785	0
mLu_M_801	Lu	Lung	M	801	0
mMu_F_826	Mu	Muscle	F	826	0
mMu_F_842	Mu	Muscle	F	842	0
mMu_M_794	Mu	Muscle	M	794	0
mMu_M_810	Mu	Muscle	M	810	0.12
mOv_F_820	Ov	Ovary	F	820	0
mOv_F_836	Ov	Ovary	F	836	0
mSin_F_824	Sin	Small intestine	F	824	0
mSin_F_840	Sin	Small intestine	F	840	0
mSin_M_792	Sin	Small intestine	M	792	0
mSin_M_808	Sin	Small intestine	M	808	0
mSp_F_816	Sp	Spleen	F	816	0
mSp_F_832	Sp	Spleen	F	832	0
mSp_M_784	Sp	Spleen	M	784	0.14
mSp_M_800	Sp	Spleen	M	800	0.14
mSt_F_822	St	Stomach	F	822	0
mSt_F_838	St	Stomach	F	838	0
mSt_M_790	St	Stomach	M	790	0.39
mSt_M_806	St	Stomach	M	806	0.18
mTe_M_788	Te	Testis	M	788	81.55
mTe_M_804	Te	Testis	M	804	72.17
mTh_F_819	Th	Thymus	F	819	0
mTh_F_835	Th	Thymus	F	835	0
mTh_M_787	Th	Thymus	M	787	0
mTh_M_803	Th	Thymus	M	803	0
mUt_F_827	Ut	Uterus	F	827	0
mUt_F_843	Ut	Uterus	F	843	0
mVg_M_795	Vg	Vesicular gland	M	795	0
mVg_M_811	Vg	Vesicular gland	M	811	0

## Sheet: Fig 2C
Sample	Type	Expression data
sertoli_config_low	Sertoli cells	0
sertoli_config_high	sertoli cells	0.09
sg_config_low	spermatogonia	0
sg_config_high	spermatogonia	0
sc_config_low	spermatocytes	24.08
sc_config_high	spermatocytes	26.56
sd_config_low	spermatids	248.04
sd_config_high	spermatids	256.21
sz_config_low	spermatozoa	6.54
sz_config_high	spermatozoa	7.88

## Sheet: Fig 4C
	Dnajb8+/+	Dnajb8-/-
body weight(g)	34.2	29.1
	31.1	32.9
	32.1	37.1
	36	35.4
	38.8	30.2
	30.5

## Sheet: Fig 4D
	Dnajb8+/+	Dnajb8-/-
testis weight(mg)	84.2	82.3
	90.1	93.6
	88.5	93.4
	90.4	90.9
	98.1	97.3
	91.7

## Sheet: Fig 4E
	Dnajb8+/+	Dnajb8-/-
pups	10	8
	5	7
	6	5
	5	6
	6	7
	5	6
	7	7
	6	8
	4	5
	5	8
	8	7
	5	4
No. of pups per litter	6	6.5

## Sheet: Fig 5A
	Dnajb8+/+	Dnajb8-/-
Sperm count (×107)	1.25	1.32
	1.51	1.43
	1.09	1.18
	1.43	1.05
	1.15	1.53
	1.6

## Sheet: Fig 5B
	Dnajb8+/+	Dnajb8-/-
Sperm motility (%)	65	66
	73	84
	79	80
	61	71
	77	70
	60

[truncated: 4 more sheets: Fig 6C, Fig6D, Fig 6F, Fig 6G]
